# Supplementary material for: Transcriptome Wide Annotation of Eukaryotic RNase III Reactivity and Degradation Signals
Source: PLoS Genet. 2015 Feb 13;11(2):e1005000. doi: 10.1371/journal.pgen.1005000 (PMC4334505; doi:10.1371/journal.pgen.1005000)
Supplement: S4 Table — (XLSX) [file pgen.1005000.s011.xlsx]

## Sheet: S4. In silico Targets
Table S4 (related to Figure 1): List of Transcripts Containing at Least One Predicted G2-loop With Score Higher Than 0.85
ID of Associated RNA	Name of Associated RNA	Type of Associated RNA	Loop Score	Known Substrate	In vitro Cleavage Detected in This Study	SGD Predicted Expression Level (RNA/cell)	Change in Expression Upon RNT1 deletion (log2)	Gene Function
LSR1	LSR1	ncRNA	0.998347	Yes	Yes	NA	-0.212697	U2 spliceosomal RNA (U2 snRNA), component of the spliceosome; pairs with the branchpoint sequence; functionally equivalent to mammalian U2 snRNA; stress-induced pseudouridylations at positions 56 and 93 may contribute to regulation of splicing
snR47	SNR47	ncRNA	0.995047	Yes	Yes	NA	-0.376512	C/D box small nucleolar RNA (snoRNA); guides 2'-O-methylation of large subunit (LSU) rRNA at position A2220 and small subunit (SSU) rRNA at position A619
snR68	SNR68	ncRNA	0.99374	Yes	Yes	NA	0.431405	C/D box small nucleolar RNA (snoRNA); guides 2'-O-methylation of large subunit (LSU) rRNA at position A2640
snR17b	SNR17B	ncRNA	0.991756	Yes	Yes	NA	-0.181667	Small nucleolar RNA (snoRNA) U3; part of small (ribosomal) subunit (SSU) processosome; SNR17A also encodes snoRNA U3
YMR229C	RRP5	Antisens	0.991712	No	No	NA	-0.332722	RNA binding protein involved in synthesis of both 18S and 5.8S rRNAs; component of both the ribosomal small subunit (SSU) processosome and the 90S preribosome; has binding preference for single stranded tracts of U's; relocalizes from nucleolus to nucleus upon DNA replication stress
YDL248W	COS7	Antisens	0.991548	No	No	NA	0.769642	Protein of unknown function; member of the DUP380 subfamily of conserved, often subtelomerically-encoded proteins; the authentic, non-tagged protein is detected in highly purified mitochondria in high-throughput studies
YNL097W-A	YNL097W-A	PCG	0.990836	No	No	NA	0.326755	Dubious open reading frame; unlikely to encode a functional protein, based on available experimental and comparative sequence data; completely overlaps the verified gene PHO23/YNL097C
snR14	SNR14	ncRNA	0.990712	Yes	No	NA	0.378101	U4 spliceosomal RNA (U4 snRNA); interacts with U6
NTS1-2	NTS1-2	ncRNA	0.990032	No	Yes	NA	0.334279	Non-transcribed region of the rDNA repeat between the 3' ETS and RDN5; required for rDNA repeat expansion
YLL023C	POM33	PCG	0.989826	No	No	1.3	0.78141	Transmembrane nucleoporin; involved in nuclear pore complex (NPC) distribution, assembly or stabilization; highly conserved across species, orthologous to human TMEM33 and paralogous to Per33p; protein abundance increases in response to DNA replication stress
YBR112C	CYC8	Antisens	0.989202	No	No	NA	0.330967	General transcriptional co-repressor; acts together with Tup1p; also acts as part of a transcriptional co-activator complex that recruits the SWI/SNF and SAGA complexes to promoters; can form the prion [OCT+]
YIL047C	SYG1	PCG	0.989083	No	No	2.39	0.505138	Plasma membrane protein of unknown function; truncation and overexpression suppresses lethality of G-alpha protein deficiency
YIL047C-A	YIL047C-A	PCG	0.989083	No	No	NA	0.376906	Dubious open reading frame; unlikely to encode a functional protein, based on available experimental and comparative sequence data; almost completely overlaps ORF SYG1/YIL047C
YJL047C-A	YJL047C-A	PCG	0.988583	No	No	NA	0.497813	Putative protein of unknown function
snR60	SNR60	ncRNA	0.988583	Yes	Yes	NA	1.12515	C/D box small nucleolar RNA (snoRNA); guides 2'-O-methylation of large subunit (LSU) rRNA at positions A817 and G908
YJL093C	TOK1	Antisens	0.9884	No	No	NA	0.852581	Outward-rectifier potassium channel of the plasma membrane; has two pore domains in tandem, each of which forms a functional channel permeable to potassium; carboxy tail functions to prevent inner gate closures; target of K1 toxin
YGL209W	MIG2	PCG	0.988247	Yes	Yes	2.45	0.389561	Zinc finger transcriptional repressor; cooperates with Mig1p in glucose-induced repression of many genes; under low glucose conditions Mig2p relocalizes to mitochondrion, where it interacts with Ups1p and antagonizes mitochondrial fission factor, Dnm1p, indicative of a role in mitochondrial fusion or regulating morphology; regulates filamentous growth along with Mig2p in response to glucose deple…
snR17a	SNR17A	ncRNA	0.988151	Yes	Yes	NA	-0.868979	Small nucleolar RNA (snoRNA) U3; part of Small ribosomal SubUnit (SSU) processosome; SNR17B also encodes snoRNA U3
YDL154W	MSH5	Antisens	0.98812	No	No	NA	0.783547	Protein of the MutS family; forms a dimer with Msh4p that facilitates crossovers between homologs during meiosis; msh5-Y823H mutation confers tolerance to DNA alkylating agents; homologs present in C. elegans and humans
YNLWsigma2	YNLWsigma2	Antisens	0.987743	No	No	NA	NA	Ty3 LTR
YNLWsigma3	YNLWsigma3	Antisens	0.987743	No	No	NA	NA	Ty3 LTR
ETS2-1	ETS2-1	ncRNA	0.987722	Yes	No	NA	NA	Non-coding region located adjacent to and downstream of RDN25; transcribed as part of the 35S rRNA precursor transcript; contains the primary rRNA transcription termination site at +93 and a secondary termination site between +211 and +250
RDN25-1	RDN25-1	ncRNA	0.987722	Yes	No	NA	NA	25S ribosomal RNA (25S rRNA); component of the large (60S) ribosomal subunit; encoded in the rDNA repeat (RDN1) as part of the 35S primary transcript; formed by endonucleolytic cleavage at the C2 site of internal transcribed spacer 2 (ITS2)
RDN37-1	RDN37-1	ncRNA	0.987722	Yes	No	NA	NA	35S ribosomal RNA (35S rRNA) transcript; encoded by the RDN1 locus; processed into the 25S, 18S and 5.8S rRNAs (represented by the RDN25, RDN18, and RDN58 loci)
YKL011C	CCE1	PCG	0.987341	No	No	0.4	0.640931	Mitochondrial cruciform cutting endonuclease; cleaves Holliday junctions formed during recombination of mitochondrial DNA; CCE1 has a paralog, MRS1, that arose from the whole genome duplication
snR63	SNR63	ncRNA	0.986929	Yes	Yes	NA	0.324251	C/D box small nucleolar RNA (snoRNA); guides 2'-O-methylation of large subunit (LSU) rRNA at position A2256
YJL051W	IRC8	PCG	0.986619	No	No	0.3	0.750162	Bud tip localized protein of unknown function; mRNA is targeted to the bud by a She2p dependent transport system; mRNA is cell cycle regulated via Fkh2p, peaking in G2/M phase; null mutant displays increased levels of spontaneous Rad52p foc
YLR259C	HSP60	PCG	0.986474	No	Yes	8.74	-0.848364	Tetradecameric mitochondrial chaperonin; required for ATP-dependent folding of precursor polypeptides and complex assembly; prevents aggregation and mediates protein refolding after heat shock; role in mtDNA transmission; phosphorylated
snR58	SNR58	ncRNA	0.986231	Yes	Yes	NA	0.658311	C/D box small nucleolar RNA (snoRNA); guides 2'-O-methylation of large subunit (LSU) rRNA at position C663
YHR042W	NCP1	Antisens	0.986085	No	No	NA	-0.188584	NADP-cytochrome P450 reductase; involved in ergosterol biosynthesis; associated and coordinately regulated with Erg11p
YML093W	UTP14	PCG	0.98575	No	Yes	1.51	0.282282	Subunit of U3-containing Small Subunit (SSU) processome complex; involved in production of 18S rRNA and assembly of small ribosomal subunit
YPL245W	YPL245W	Antisens	0.985643	No	No	NA	0.44402	Putative protein of unknown function; green fluorescent protein (GFP)-fusion protein localizes to both the nucleus and the cytoplasm
snR7-L	SNR7-L	ncRNA	0.985633	Yes	Yes	NA	0.119853	U5 spliceosomal RNA (U5 snRNA), long form; associated with spliceosome
snR7-S	SNR7-S	ncRNA	0.985633	Yes	Yes	NA	0.0966113	U5 spliceosomal RNA (U5 snRNA), short form; derived from SNR7-L by 3' end processing; associated with spliceosome
YJL212C	OPT1	PCG	0.985233	No	No	1.56	0.0873763	Proton-coupled oligopeptide transporter of the plasma membrane; also transports glutathione and phytochelatin; member of the OPT family
YBR012W-B	YBR012W-B	Antisens	0.984971	No	No	NA	-0.699911	Retrotransposon TYA Gag and TYB Pol genes; transcribed/translated as one unit; polyprotein is processed to make a nucleocapsid-like protein (Gag), reverse transcriptase (RT), protease (PR), and integrase (IN); similar to retroviral genes
snR65	SNR65	ncRNA	0.984769	Yes	Yes	NA	0.0444991	C/D box small nucleolar RNA (snoRNA); guides 2'-O-methylation of large subunit (LSU) rRNA at position U2347
snR43	SNR43	ncRNA	0.984554	Yes	Yes	NA	-0.288251	H/ACA box small nucleolar RNA (snoRNA); guides pseudouridylation of large subunit (LSU) rRNA at position U966 and of 5.8S rRNA at position 73
YDR390C	UBA2	PCG	0.984424	No	No	1.22	0.558003	Subunit of heterodimeric nuclear SUMO activating enzyme E1 with Aos1p; activates Smt3p (SUMO) before its conjugation to proteins (sumoylation), which may play a role in protein targeting; essential for viability;
YJR002W	MPP10	PCG	0.984289	No	Yes	0.9	0.201678	Component of the SSU processome and 90S preribosome; required for pre-18S rRNA processing, interacts with and controls the stability of Imp3p and Imp4p, essential for viability; similar to human Mpp10p
YDR159W	SAC3	PCG	0.983701	No	No	0.6	0.715817	Nuclear pore-associated protein; required for biogenesis of the small ribosomal subunit; component of TREX-2 complex (Sac3p-Thp1p-Sus1p-Cdc31p) involved in transcription elongation and mRNA export from the nucleus; involved in post-transcriptional tethering of active genes to the nuclear periphery and to non-nascent mRNP; similar to the human germinal center-associated nuclear protein (GANP)
YDR170W-A	YDR170W-A	Antisens	0.983624	No	No	NA	-0.546045	Retrotransposon TYA Gag gene; Gag is a nucleocapsid protein that is the structural constituent of virus-like particles (VLPs); similar to retroviral Gag; YDR170W-A is part of a mutant retrotransposon; distribution in the cytoplasm becomes irregular rather than punctate upon DNA replication stress
YNL255C	GIS2	Antisens	0.983333	No	No	NA	0.344463	Translational activator for mRNAs with internal ribosome entry sites; associates with polysomes and binds to a specific subset of mRNAs; localizes to RNA processing bodies (P bodies) and to stress granules; may have a role in translation regulation under stress conditions; ortholog of human ZNF9/CNBP, a gene involved in myotonic dystrophy type 2
YDR232W	HEM1	Antisens	0.983251	No	No	NA	0.00483737	5-aminolevulinate synthase; catalyzes the first step in the heme biosynthetic pathway; an N-terminal signal sequence is required for localization to the mitochondrial matrix; expression is regulated by Hap2p-Hap3p
YPL019C	VTC3	PCG	0.982947	No	No	1.39	-1.63658	Subunit of vacuolar transporter chaperone (VTC) complex; involved in membrane trafficking, vacuolar polyphosphate accumulation, microautophagy and non-autophagic vacuolar fusion; VTC3 has a paralog, VTC2, that arose from the whole genome duplication
YOL021C	DIS3	PCG	0.982845	No	Yes	1.59	0.367943	Exosome core complex catalytic subunit; possesses both endonuclease and 3'-5' exonuclease activity; involved in 3'-5' RNA processing and degradation in both the nucleus and the cytoplasm; has similarity to E. coli RNase R and to human DIS3; mutations in Dis3p corresponding to human mutations implicated in multiple myeloma cause phenotypes suggesting impaired exosome function; protein abundance in…
YLR173W	YLR173W	Antisens	0.982712	No	No	NA	0.828328	Putative protein of unknown function
YLR110C	CCW12	Antisens	0.982707	No	No	NA	-0.85976	Cell wall mannoprotein; plays a role in maintenance of newly synthesized areas of cell wall; localizes to periphery of small buds, septum region of larger buds, and shmoo tip; CCW12 has a paralog, YDR134C, that arose from the whole genome duplication
YBL024W	NCL1	Antisens	0.982625	No	No	NA	-0.0451104	S-adenosyl-L-methionine-dependent tRNA: m5C-methyltransferase; methylates cytosine to m5C at several positions in tRNAs and intron-containing pre-tRNAs; increases proportion of tRNALeu(CAA) with m5C at wobble position in response to hydrogen peroxide, causing selective translation of mRNA from genes enriched in TTG codon; loss of NCL1 confers hypersensitivity to oxidative stress; similar to Nop2p…
YAR028W	YAR028W	PCG	0.982608	No	No	0.3	0.688279	Putative integral membrane protein; member of DUP240 gene family; GFP-fusion protein is induced in response to the DNA-damaging agent MMS
YBL038W	MRPL16	PCG	0.982381	No	No	1.82	0.72155	Mitochondrial ribosomal protein of the large subunit; homologous to bacterial L16 ribosomal protein; synthetically lethal with hac1 mutant suggesting a role in the maturation of secretory proteins
YNR034W	SOL1	PCG	0.982038	No	No	0.6	0.649263	Protein with a possible role in tRNA export; shows similarity to 6-phosphogluconolactonase non-catalytic domains but does not exhibit this enzymatic activity; homologous to Sol3p and Sol4p; SOL1 has a paralog, SOL2, that arose from the whole genome duplication; protein abundance increases in response to DNA replication stress
chrXI_430921_431409	chrXI_430921_431409	Intergenic	0.981787	No	No	NA	NA	NA
YLR235C	YLR235C	PCG	0.981168	No	No	NA	0.383392	Dubious open reading frame; unlikely to encode a functional protein, based on available experimental and comparative sequence data; overlaps ORFs TOP3/YLR234W and YLR236C
YLR236C	YLR236C	PCG	0.981168	No	No	NA	0.391586	Dubious open reading frame; unlikely to encode a functional protein, based on available experimental and comparative sequence data; overlaps ORF YLR235C
YMR224C	MRE11	Antisens	0.981125	No	No	NA	0.658068	Nuclease subunit of the MRX complex with Rad50p and Xrs2p; complex functions in repair of DNA double-strand breaks and in telomere stability; Mre11p associates with Ser/Thr-rich ORFs in premeiotic phase; nuclease activity required for MRX function; widely conserved; forms nuclear foci upon DNA replication stress
YHR102W	KIC1	Antisens	0.981043	No	No	NA	0.711151	Protein kinase of the PAK/Ste20 family, required for cell integrity; physically interacts with Cdc31p (centrin), which is a component of the spindle pole body; part of the RAM network that regulates cellular polarity and morphogenesis
YLR070C	XYL2	Antisens	0.981005	No	No	NA	0.805162	Xylitol dehydrogenase; converts xylitol to D-xylulose; expression induced by xylose, even though this pentose sugar is not well utilized by S. cerevisiae; null mutant has cell wall defect
YLR071C	RGR1	Antisens	0.981005	No	No	NA	0.503983	Subunit of the RNA polymerase II mediator complex; associates with core polymerase subunits to form the RNA polymerase II holoenzyme; required for glucose repression, HO repression, RME1 repression and sporulation
YGR031W	IMO32	PCG	0.980829	No	No	0.7	0.67583	Conserved mitochondrial protein of unknown function; processed by both mitochondrial processing peptidase and mitochondrial octapeptidyl aminopeptidase; gene contains the nested antisense gene NAG1
YOL064C	MET22	PCG	0.980805	No	No	1.39	0.24899	Bisphosphate-3'-nucleotidase; involved in salt tolerance and methionine biogenesis; dephosphorylates 3'-phosphoadenosine-5'-phosphate and 3'-phosphoadenosine-5'-phosphosulfate, intermediates of the sulfate assimilation pathway
YOL065C	INP54	PCG	0.980805	No	No	0.3	0.739588	Phosphatidylinositol 4,5-bisphosphate 5-phosphatase; role in secretion; localizes to the endoplasmic reticulum via the C-terminal tail; lacks the Sac1 domain and proline-rich region found in the other 3 INP proteins
YJL101C	GSH1	Antisens	0.98072	No	No	NA	0.525986	Gamma glutamylcysteine synthetase; catalyzes the first step in glutathione (GSH) biosynthesis; expression induced by oxidants, cadmium, and mercury; protein abundance increases in response to DNA replication stress
YDR179W-A	YDR179W-A	PCG	0.980399	No	No	NA	0.65789	Putative protein of unknown function
YHR092C	HXT4	PCG	0.980336	No	No	3.08	0.612273	High-affinity glucose transporter; member of the major facilitator superfamily, expression is induced by low levels of glucose and repressed by high levels of glucose; HXT4 has a paralog, HXT7, that arose from the whole genome duplication
YDL038C	YDL038C	Antisens	0.980309	No	No	NA	-0.224323	NA
YBL052C	SAS3	PCG	0.980287	No	No	0.81	0.578877	Histone acetyltransferase catalytic subunit of NuA3 complex; acetylates histone H3, involved in transcriptional silencing; homolog of the mammalian MOZ proto-oncogene; mutant has aneuploidy tolerance; sas3gcn5 double mutation is lethal
YMR012W	CLU1	Antisens	0.97971	No	No	NA	-0.398311	Subunit of the eukaryotic translation initiation factor 3 (eIF3); component of unknown function; deletion causes defects in mitochondrial organization but not in growth or translation initiation; can rescue cytokinesis and mitochondrial organization defects of the Dictyostelium cluA- mutant
YAL051W	OAF1	Antisens	0.979472	No	No	NA	0.80245	Oleate-activated transcription factor; acts alone and as a heterodimer with Pip2p; activates genes involved in beta-oxidation of fatty acids and peroxisome organization and biogenesis; involved in diauxic shift; OAF1 has a paralog, PIP2, that arose from the whole genome duplication
YGR271W	SLH1	Antisens	0.979229	No	No	NA	0.711666	Putative RNA helicase related to Ski2p; involved in translation inhibition of non-poly(A) mRNAs; required for repressing propagation of dsRNA viruses
YOR090C	PTC5	PCG	0.979146	No	No	0.4	0.602638	Mitochondrial type 2C protein phosphatase (PP2C); involved in regulation of pyruvate dehydrogenase activity by dephosphorylating the serine 133 of the Pda1p subunit; localizes to the intermembrane space and is imported via the presequence pathway and processed by the inner membrane protease (Imp1p-Imp2p); acts in concert with kinases Pkp1p and Pkp2p and phosphatase Ptc6p
YBR097W	VPS15	PCG	0.978968	No	No	0.3	0.576028	Serine/threonine protein kinase involved in vacuolar protein sorting; functions as a membrane-associated complex with Vps34p; active form recruits Vps34p to the Golgi membrane; interacts with the GDP-bound form of Gpa1p; myristoylated; a fraction is localized, with Vps34p, to nuclear pores at nucleus-vacuole junctions and may facilitate transcription elongation for genes positioned at the nuclear…
YJL159W	HSP150	Antisens	0.978849	No	No	NA	0.16331	O-mannosylated heat shock protein; secreted and covalently attached to the cell wall via beta-1,3-glucan and disulfide bridges; required for cell wall stability; induced by heat shock, oxidative stress, and nitrogen limitation; HSP150 has a paralog, PIR3, that arose from the whole genome duplication
YBL079W	NUP170	PCG	0.978752	No	Yes	1.22	0.342801	Subunit of the inner ring of the nuclear pore complex (NPC); contributes to NPC assembly and nucleocytoplasmic transport; both Nup170p and NUP157p are similar to human Nup155p; NUP170 has a paralog, NUP157, that arose from the whole genome duplication
YLR210W	CLB4	PCG	0.978624	No	No	0.6	0.729371	B-type cyclin involved in cell cycle progression; activates Cdc28p to promote the G2/M transition; may be involved in DNA replication and spindle assembly; accumulates during S phase and G2, then targeted for ubiquitin-mediated degradation; CLB4 has a paralog, CLB3, that arose from the whole genome duplication
YNL149C	PGA2	PCG	0.978572	No	Yes	4	0.158634	Essential protein required for maturation of Gas1p and Pho8p; involved in protein trafficking; GFP-fusion protein localizes to the ER and YFP-fusion protein to the nuclear envelope-ER network; null mutants have a cell separation defect
YIL140W	AXL2	PCG	0.978495	No	Yes	0.4	0.864221	Integral plasma membrane protein; required for axial budding in haploid cells; localizes to the incipient bud site and bud neck; glycosylated by Pmt4p; potential Cdc28p substrate
YDR007W	TRP1	PCG	0.978455	No	No	NA	0.367218	Phosphoribosylanthranilate isomerase; catalyzes the third step in tryptophan biosynthesis; in 2004, the sequence of TRP1 from strain S228C was updated by changing the previously annotated internal STOP (TAA) to serine (TCA)
YPR145W	ASN1	PCG	0.978393	No	Yes	12	-0.225214	Asparagine synthetase; catalyzes the synthesis of L-asparagine from L-aspartate in the asparagine biosynthetic pathway; ASN1 has a paralog, ASN2, that arose from the whole genome duplication
YLR091W	GEP5	Antisens	0.978339	No	No	NA	0.741632	Protein of unknown function; required for mitochondrial genome maintenance; detected in highly purified mitochondria in high-throughput studies; null mutant has decreased levels of cardiolipin and phosphatidylethanolamine
snR40	SNR40	ncRNA	0.978266	Yes	Yes	NA	0.0184513	C/D box small nucleolar RNA (snoRNA); guides 2'-O-methylation of large subunit (LSU) rRNA at position U898 and small subunit (SSU) rRNA at position G1271
chrV_60991_61212	chrV_60991_61212	Intergenic	0.978155	No	No	NA	NA	NA
YGR144W	THI4	PCG	0.978007	No	No	0.7	0.799089	Thiazole synthase; abundant protein involved in the formation of the thiazole moiety of thiamine during thiamine biosynthesis; acts more as a co-substrate rather than an enzyme by providing the sulphur source for thiazole formation; undergoes a single turnover only; required for mitochondrial genome stability in response to DNA damaging agents
YLR354C	TAL1	Antisens	0.977809	No	No	NA	0.0263322	Transaldolase, enzyme in the non-oxidative pentose phosphate pathway; converts sedoheptulose 7-phosphate and glyceraldehyde 3-phosphate to erythrose 4-phosphate and fructose 6-phosphate; TAL1 has a paralog, NQM1, that arose from the whole genome duplication
YLR016C	PML1	PCG	0.977725	No	No	0.9	0.540449	Subunit of the RES complex; RES complex is required for nuclear retention of unspliced pre-mRNAs; acts in the same pathway as Pml39p and Mlp1p
YMR013W-A	YMR013W-A	PCG	0.977637	No	No	NA	1.79853	Dubious open reading frame; unlikely to encode a functional protein, based on available experimental and comparative sequence data; completely overlaps the characterized snoRNA gene snR73
snR72	SNR72	ncRNA	0.977637	Yes	Yes	NA	1.0136	C/D box small nucleolar RNA (snoRNA); guides 2'-O-methylation of large subunit (LSU) rRNA at position A876
snR73	SNR73	ncRNA	0.977637	Yes	Yes	NA	1.88648	C/D box small nucleolar RNA (snoRNA); guides 2'-O-methylation of large subunit (LSU) rRNA at position C2959
YNL124W	NAF1	Antisens	0.977529	No	No	NA	0.0998674	RNA-binding protein required for the assembly of box H/ACA snoRNPs; thus required for pre-rRNA processing; forms a complex with Shq1p and interacts with H/ACA snoRNP components Nhp2p and Cbf5p; similar to Gar1p
YDR164C	SEC1	Antisens	0.977343	No	No	NA	0.538835	Sm-like protein involved in docking and fusion of exocytic vesicles; binds to assembled SNARE complexes at the membrane and stimulates membrane fusion; localization to sites of secretion (bud neck and bud tip) is dependent on SNARE function; interacts directly with essential exocyst subunit Sec6p
YML009W-B	YML009W-B	PCG	0.977038	No	No	NA	-0.331534	Dubious open reading frame; unlikely to encode a functional protein, based on available experimental and comparative sequence data; deletion mutation confers an increase in Ty1 transposition
YML010W	SPT5	PCG	0.977038	No	Yes	1.3	-0.153094	Component of the universally conserved Spt4/5 complex (DSIF complex); the complex has multiple roles in concert with RNA polymerases I and II, including regulation of transcription elongation, RNA processing, quality control, and transcription-coupled DNA repair
YPL258C	THI21	PCG	0.976621	No	No	0.4	0.846056	Hydroxymethylpyrimidine (HMP) and HMP-phosphate kinase; involved in thiamine biosynthesis; member of a gene family with THI20 and THI22; functionally redundant with Thi20p
YNL278W	CAF120	Antisens	0.976392	No	No	NA	0.812445	Part of the CCR4-NOT transcriptional regulatory complex; involved in controlling mRNA initiation, elongation, and degradation; CAF120 has a paralog, SKG3, that arose from the whole genome duplication
YGL236C	MTO1	PCG	0.976206	No	No	0.3	0.424094	Mitochondrial protein; forms a heterodimer complex with Mss1p that performs the 5-carboxymethylaminomethyl modification of the wobble uridine base in mitochondrial tRNAs; required for respiration in paromomycin-resistant 15S rRNA mutants
YLL032C	YLL032C	Antisens	0.976143	No	No	NA	0.62428	Protein of unknown function; may interact with ribosomes, based on co-purification experiments; green fluorescent protein (GFP)-fusion protein localizes to the cytoplasm; YLL032C is not an essential gene
YNL092W	YNL092W	Antisens	0.97609	No	No	NA	0.825379	Putative S-adenosylmethionine-dependent methyltransferase; of the seven beta-strand family; YNL092W is not an essential gene
YMR170C	ALD2	PCG	0.976007	No	No	3.17	0.791854	Cytoplasmic aldehyde dehydrogenase; involved in ethanol oxidation and beta-alanine biosynthesis; uses NAD+ as the preferred coenzyme; expression is stress induced and glucose repressed; very similar to Ald3p
YOL080C	REX4	PCG	0.975964	No	No	0.8	0.315283	Putative RNA exonuclease; possibly involved in pre-rRNA processing and ribosome assembly
YOR342C	YOR342C	Antisens	0.975917	No	No	NA	0.314649	Protein of unknown function; green fluorescent protein (GFP)-fusion protein localizes to the cytoplasm and the nucleus; relocalizes from nucleus to cytoplasm upon DNA replication stress; YOR342C has a paralog, YAL037W, that arose from the whole genome duplication
YKR093W	PTR2	Antisens	0.975728	No	No	NA	0.286446	Integral membrane peptide transporter; mediates transport of di- and tri-peptides; conserved protein that contains 12 transmembrane domains; PTR2 expression is regulated by the N-end rule pathway via repression by Cup9p
YGL123W	RPS2	PCG	0.975618	No	No	85	-0.966932	Protein component of the small (40S) subunit; essential for control of translational accuracy; phosphorylation by C-terminal domain kinase I (CTDK-I) enhances translational accuracy; methylated on one or more arginine residues by Hmt1p; homologous to mammalian ribosomal protein S2 and bacterial S5
chrXIII_13315_14402	chrXIII_13315_14402	Intergenic	0.975386	No	No	NA	NA	NA
YBL029W	YBL029W	PCG	0.975119	No	No	0.3	0.617485	Non-essential protein of unknown function
YLR238W	FAR10	PCG	0.97509	No	No	0.3	0.724824	Protein involved in recovery from arrest in response to pheromone; acts in a cell cycle arrest recovery pathway independent from Far1p; interacts with Far3p, Far7p, Far8p, Far9p, and Far11p; potential Cdc28p substrate; FAR10 has a paralog, VPS64, that arose from the whole genome duplication
YAR002C-A	ERP1	Antisens	0.974889	No	No	NA	0.504372	Member of the p24 family involved in ER to Golgi transport; role in misfolded protein quality control; forms heterotrimeric complex with Erp2p, Emp24p, and Erv25p; localized to COPII-coated vesicles; ERP1 has a paralog, ERP6, that arose from the whole genome duplication
YAR014C	BUD14	Antisens	0.974885	No	No	NA	0.547997	Protein involved in bud-site selection; Bud14p-Glc7p complex is a cortical regulator of dynein; inhibitor of the actin assembly factor Bnr1p (formin); diploid mutants display a random budding pattern instead of the wild-type bipolar pattern; relative distribution to the nucleus increases upon DNA replication stress
YOL122C	SMF1	PCG	0.974693	No	Yes	1.3	1.17191	Divalent metal ion transporter; broad specificity for di-valent and tri-valent metals; post-translationally regulated by levels of metal ions; member of the Nramp family of metal transport proteins
YIL034C	CAP2	Antisens	0.974655	No	No	NA	0.721922	Beta subunit of the capping protein heterodimer (Cap1p and Cap2p); capping protein (CP) binds to the barbed ends of actin filaments preventing further polymerization; localized predominantly to cortical actin patches; protein increases in abundance and relocalizes from bud neck to plasma membrane upon DNA replication stress
YGL185C	YGL185C	Antisens	0.974563	No	No	NA	0.64448	Putative protein with sequence similar to hydroxyacid dehydrogenases; green fluorescent protein (GFP)-fusion protein localizes to the cytoplasm
chrX_405080_405443	chrX_405080_405443	Intergenic	0.97452	No	No	NA	NA	NA
chrV_503917_505247	chrV_503917_505247	Intergenic	0.974422	No	No	NA	NA	NA
YHL007C	STE20	PCG	0.974286	No	No	0.7	0.340114	Cdc42p-activated signal transducing kinase; involved in pheromone response, pseudohyphal/invasive growth, vacuole inheritance, down-regulation of sterol uptake; GBB motif binds Ste4p; member of the PAK (p21-activated kinase) family
YER145C-A	YER145C-A	PCG	0.974264	No	No	NA	0.015143	Dubious open reading frame; unlikely to encode a functional protein, based on available experimental and comparative sequence data; almost completely overlaps verified ORF LSM5/YER146W
YGR072W	UPF3	Antisens	0.973981	No	No	NA	0.779451	Component of the nonsense-mediated mRNA decay (NMD) pathway; along with Nam7p and Nmd2p; involved in decay of mRNA containing nonsense codons; involved in telomere maintenance
snR77	SNR77	ncRNA	0.973938	Yes	Yes	NA	0.924449	C/D box small nucleolar RNA (snoRNA); guides 2'-O-methylation of small subunit (SSU) rRNA at position U578
snR78	SNR78	ncRNA	0.973938	Yes	Yes	NA	3.58781	C/D box small nucleolar RNA (snoRNA); guides 2'-O-methylation of large subunit (LSU) rRNA at position U2421
YGR103W	NOP7	Antisens	0.973419	No	No	NA	-0.0608284	Component of several different pre-ribosomal particles; forms a complex with Ytm1p and Erb1p that is required for maturation of the large ribosomal subunit; required for exit from G<sub>0</sub> and the initiation of cell proliferation
snR62	SNR62	ncRNA	0.973288	Yes	Yes	NA	NA	C/D box small nucleolar RNA (snoRNA); guides 2'-O-methylation of large subunit (LSU) rRNA at position U1888
YIR019C	FLO11	Antisens	0.973129	No	No	NA	0.741425	GPI-anchored cell surface glycoprotein (flocculin); required for pseudohyphal formation, invasive growth, flocculation, and biofilms; transcriptionally regulated by the MAPK pathway (via Ste12p and Tec1p) and the cAMP pathway (via Flo8p); required for formation of fibrous interconnections between cells in a colony of a wild S. cerevisiae strain; a portion is cleaved and shed from cells, and free …
chrXI_589087_589897	chrXI_589087_589897	Intergenic	0.973118	No	No	NA	NA	NA
YML006C	GIS4	PCG	0.973114	No	No	1.1	0.619157	CAAX box containing protein of unknown function; proposed to be involved in the RAS/cAMP signaling pathway
YMR058W	FET3	Antisens	0.97265	No	No	NA	-0.203647	Ferro-O2-oxidoreductase; required for high-affinity iron uptake and involved in mediating resistance to copper ion toxicity, belongs to class of integral membrane multicopper oxidases; protein abundance increases in response to DNA replication stress
YMR106C	YKU80	Antisens	0.972569	No	No	NA	0.606255	Subunit of the telomeric Ku complex (Yku70p-Yku80p); involved in telomere length maintenance, structure and telomere position effect; required for localization of telomerase ribonucleoprotein via interaction with the TLC1 guide RNA; relocates to sites of double-strand cleavage to promote nonhomologous end joining during DSB repair
YPL256C	CLN2	Antisens	0.972405	No	No	NA	0.458692	G1 cyclin involved in regulation of the cell cycle; activates Cdc28p kinase to promote the G1 to S phase transition; late G1 specific expression depends on transcription factor complexes, MBF (Swi6p-Mbp1p) and SBF (Swi6p-Swi4p); CLN2 has a paralog, CLN1, that arose from the whole genome duplication
YOL033W	MSE1	PCG	0.972372	No	No	0.4	0.609259	Mitochondrial glutamyl-tRNA synthetase; predicted to be palmitoylated
YDR520C	URC2	PCG	0.972277	No	No	0.4	0.738307	Putative Zn(II)2Cys6 motif containing transcription factor; non-essential gene identified in a screen for mutants with increased levels of rDNA transcription; similar to S. kluyveri Urc2p involved in uracil catabolism
YCR089W	FIG2	Antisens	0.972249	No	No	NA	0.674477	Cell wall adhesin, expressed specifically during mating; may be involved in maintenance of cell wall integrity during mating; FIG2 has a paralog, AGA1, that arose from the whole genome duplication
YER116C	SLX8	PCG	0.972138	No	Yes	0.2	0.687019	Subunit of Slx5-Slx8 SUMO-targeted ubiquitin ligase (STUbL) complex; stimulated by prior attachment of SUMO to the substrate; contains a C-terminal RING domain; forms nuclear foci upon DNA replication stress
YER008C	SEC3	Antisens	0.971945	No	No	NA	0.521515	Subunit of the exocyst complex; the exocyst mediates polarized targeting and tethering of post-Golgi secretory vesicles to sites of exocytosis prior to SNARE-mediated fusion; PtdIns[4,5]P2-binding protein that localizes to exocytic sites in a Rho1p-dependent, actin-independent manner, targeting and anchoring the exocyst to the plasma membrane with Exo70p; direct GTP Rho1p effector; required for E…
YGL127C	SOH1	Antisens	0.971799	No	No	NA	0.535587	Subunit of the RNA polymerase II mediator complex; associates with core polymerase subunits to form the RNA polymerase II holoenzyme; involved in telomere maintenance; conserved with other metazoan MED31 subunits
YLR378C	SEC61	Antisens	0.971702	No	No	NA	0.431043	Conserved ER protein translocation channel; essential subunit of Sec61 complex (Sec61p, Sbh1p, and Sss1p); forms a channel for SRP-dependent protein import and may be responsible for retrograde transport of misfolded proteins out of the ER; with Sec63 complex allows SRP-independent protein import into ER
YGR027C	RPS25A	Antisens	0.971639	No	No	NA	-0.377297	Protein component of the small (40S) ribosomal subunit; homologous to mammalian ribosomal protein S25, no bacterial homolog; RPS25A has a paralog, RPS25B, that arose from the whole genome duplication
chrVII_609840_610428	chrVII_609840_610428	Intergenic	0.971463	No	No	NA	NA	NA
YBL066C	SEF1	Antisens	0.971359	No	No	NA	0.818999	Putative transcription factor; has homolog in Kluyveromyces lactis
YHR107C	CDC12	PCG	0.971112	No	Yes	1	0.372953	Component of the septin ring that is required for cytokinesis; septins are GTP-binding proteins that assemble into rod-like hetero-oligomers that can associate with other rods to form filaments; septin rings at the mother-bud neck act as scaffolds for recruiting cell division factors and as barriers to prevent diffusion of specific proteins between mother and daughter cells
YHR028C	DAP2	Antisens	0.971099	No	No	NA	0.514401	Dipeptidyl aminopeptidase; synthesized as a glycosylated precursor; localizes to the vacuolar membrane; similar to Ste13p
YOR291W	YPK9	Antisens	0.970808	No	No	NA	0.69782	Vacuolar protein with a possible role in sequestering heavy metals; has similarity to the type V P-type ATPase Spf1p; homolog of human ATP13A2 (PARK9), mutations in which are associated with Parkinson disease and Kufor-Rakeb syndrome
YOL010W	RCL1	PCG	0.97043	No	No	1.64	0.24212	Endonuclease that cleaves pre-rRNA at site A2 for 18S rRNA biogenesis; subunit of U3-containing 90S preribosome processome complex involved in small ribosomal subunit assembly; stimulates Bms1p GTPase and U3 binding activity; similar to RNA cyclase-like proteins but no cyclase activity detected
YDL180W	YDL180W	Antisens	0.970275	No	No	NA	0.859899	Putative protein of unknown function; green fluorescent protein (GFP)-fusion protein localizes to the vacuole
YJL210W	PEX2	PCG	0.970177	No	No	0.7	0.718038	RING-finger peroxin and E3 ubiquitin ligase; peroxisomal membrane protein with a C-terminal zinc-binding RING domain, forms translocation subcomplex with Pex10p and Pex12p which functions in peroxisomal matrix protein import
YPR029C	APL4	PCG	0.970095	No	No	1.1	0.543909	Gamma-adaptin; large subunit of the clathrin-associated protein (AP-1) complex; binds clathrin; involved in vesicle mediated transport
YLR256W-A	YLR256W-A	Antisens	0.969932	No	No	NA	-0.755414	Retrotransposon TYA Gag gene co-transcribed with TYB Pol; translated as TYA or TYA-TYB polyprotein; Gag is a nucleocapsid protein that is the structural constituent of virus-like particles (VLPs); similar to retroviral Gag
YOR217W	RFC1	PCG	0.969866	No	Yes	1.1	0.470886	Subunit of heteropentameric Replication factor C (RF-C); RF-C is a DNA binding protein and ATPase that acts as a clamp loader of the proliferating cell nuclear antigen (PCNA) processivity factor for DNA polymerases delta and epsilon
YBR121C	GRS1	Antisens	0.969853	No	No	NA	-0.341005	Cytoplasmic and mitochondrial glycyl-tRNA synthase; ligates glycine to the cognate anticodon-bearing tRNA; transcription termination factor that may interact with the 3'-end of pre-mRNA to promote 3'-end formation; GRS1 has a paralog, GRS2, that arose from the whole genome duplication
YBR121C-A	YBR121C-A	Antisens	0.969853	No	No	NA	-0.334276	Dubious open reading frame; unlikely to encode a functional protein, based on available experimental and comparative sequence data; completely contained within the verified gene GRS1; identified by expression profiling and mass spectrometry
YBR247C	ENP1	PCG	0.969813	No	No	1.21	-0.0382493	Protein associated with U3 and U14 snoRNAs; required for pre-rRNA processing and 40S ribosomal subunit synthesis; localized in the nucleus and concentrated in the nucleolus
YKL054C	DEF1	Antisens	0.969699	No	No	NA	0.0101641	RNAPII degradation factor; forms a complex with Rad26p in chromatin, enables ubiquitination and proteolysis of RNAPII present in an elongation complex; mutant is deficient in Zip1p loading onto chromosomes during meiosis
YGR238C	KEL2	PCG	0.969405	No	No	0.2	0.53746	Protein that negatively regulates mitotic exit; functions in a complex with Kel1p, interacts with Tem1p and Lte1p; localizes to regions of polarized growth; potential Cdc28p substrate; KEL2 has a paralog, KEL1, that arose from the whole genome duplication
chrX_231017_231157	chrX_231017_231157	Intergenic	0.969338	No	No	NA	NA	NA
YNL135C	FPR1	Antisens	0.969209	No	No	NA	0.343566	Peptidyl-prolyl cis-trans isomerase (PPIase); binds to the drugs FK506 and rapamycin; also binds to the nonhistone chromatin binding protein Hmo1p and may regulate its assembly or function
YNL102W	POL1	Antisens	0.968971	No	No	NA	0.351368	Catalytic subunit of the DNA polymerase I alpha-primase complex; required for the initiation of DNA replication during mitotic DNA synthesis and premeiotic DNA synthesis
YHR218W	YHR218W	PCG	0.968767	No	No	0.8	NA	Helicase-like protein encoded within the telomeric Y' element
YJL225C	YJL225C	PCG	0.968767	No	No	3.69	NA	Putative Y' element ATP-dependent helicase
YOR176W	HEM15	PCG	0.968763	No	No	2	0.283013	Ferrochelatase; a mitochondrial inner membrane protein, catalyzes the insertion of ferrous iron into protoporphyrin IX, the eighth and final step in the heme biosynthetic pathway
YLR425W	TUS1	Antisens	0.968704	No	No	NA	0.839978	Guanine nucleotide exchange factor (GEF) that modulate Rho1p activity; involved in the cell integrity signaling pathway; interacts with Rgl1p; localization of Tus1p to the bed neck is regulated by Rgl1p; multicopy suppressor of tor2 mutation and ypk1 ypk2 double mutation; potential Cdc28p substrate
snR76	SNR76	ncRNA	0.968548	Yes	Yes	NA	3.11459	C/D box small nucleolar RNA (snoRNA); guides 2'-O-methylation of large subunit (LSU) rRNA at position C2197
YCR076C	FUB1	PCG	0.968512	No	No	1.1	0.856249	Putative protein of unknown function; interacts physically with multiple subunits of the 20S proteasome and genetically with genes encoding 20S core particle and 19S regulatory particle subunits; exhibits boundary activity which blocks the propagation of heterochromatic silencing; contains a PI31 proteasome regulator domain and sequence similarity with human PSMF1, a proteasome inhibitor; not an …
YLR080W	EMP46	PCG	0.968505	No	No	0.1	0.863422	Integral membrane component of ER-derived COPII-coated vesicles; functions in ER to Golgi transport; EMP46 has a paralog, EMP47, that arose from the whole genome duplication
YPL154C	PEP4	PCG	0.968412	No	No	4.4	0.924906	Vacuolar aspartyl protease (proteinase A); required for the posttranslational precursor maturation of vacuolar proteinases; important for protein turnover after oxidative damage; synthesized as a zymogen, self-activates
YDR219C	MFB1	Antisens	0.968252	No	No	NA	0.76196	Mitochondria-associated F-box protein; involved in maintenance of normal mitochondrial morphology; interacts with Skp1p through the F-box motif; preferentially localizes to the mother cell during budding
YNL173C	MDG1	Antisens	0.968184	No	No	NA	0.733836	Plasma membrane protein; involved in G-protein mediated pheromone signaling pathway; overproduction suppresses bem1 mutations; MDG1 has a paralog, CRP1, that arose from the whole genome duplication
YEL011W	GLC3	PCG	0.967895	No	No	0.2	0.743065	Glycogen branching enzyme, involved in glycogen accumulation; green fluorescent protein (GFP)-fusion protein localizes to the cytoplasm in a punctate pattern; relocalizes from nucleus to cytoplasmic foci upon DNA replication stress
YKR102W	FLO10	Antisens	0.967701	No	No	NA	0.944722	Member of the FLO family of cell wall flocculation proteins; not expressed in most lab strains; overproduction induces flocculation that can be inhibited by mannose, sucrose, or glucose; overproduction also promotes haploid invasive growth and diploid filamentous growth
YLR086W	SMC4	PCG	0.9676	No	Yes	0.3	0.712781	Subunit of the condensin complex; condensin reorganizes chromosomes during both mitosis and meiosis; forms a subcomplex with Smc2p that has ATP-hydrolyzing and DNA-binding activity, but other condensin subunits are required for chromatin binding; required for tRNA gene clustering at the nucleolus; potential Cdc28p substrate
YEL055C	POL5	PCG	0.967589	No	No	0.8	-0.00889664	DNA Polymerase phi; has sequence similarity to the human MybBP1A and weak sequence similarity to B-type DNA polymerases, not required for chromosomal DNA replication; required for the synthesis of rRNA
YLL003W	SFI1	Antisens	0.967547	No	No	NA	0.804166	Centrin (Cdc31p)-binding protein required for SPB duplication; localizes to the half-bridge of the spindle pole body (SPB); required for progression through G(2)-M transition; has similarity to Xenopus laevis XCAP-C
YOR228C	MCP1	Antisens	0.967443	No	No	NA	0.903692	Mitochondrial protein of unknown function involved in lipid homeostasis; integral membrane protein that localizes to the mitochondrial outer membrane; involved in mitochondrial morphology; interacts genetically with MDM10, and other members of the ERMES complex; contains five predicted transmembrane domains
YNR033W	ABZ1	PCG	0.967269	No	No	1.1	0.379408	Para-aminobenzoate (PABA) synthase; has similarity to Escherichia coli PABA synthase components PabA and PabB; required for the synthesis of para-aminobenzoic acid, an important intermediate for folate and ubiquinone Q biosynthesis; protein abundance increases in response to DNA replication stress
YMR238W	DFG5	Antisens	0.967165	No	No	NA	0.67373	Putative mannosidase; essential glycosylphosphatidylinositol (GPI)-anchored membrane protein required for cell wall biogenesis in bud formation, involved in filamentous growth, homologous to Dcw1p
YGR031W	IMO32	Antisens	0.967129	No	No	NA	0.67583	Conserved mitochondrial protein of unknown function; processed by both mitochondrial processing peptidase and mitochondrial octapeptidyl aminopeptidase; gene contains the nested antisense gene NAG1
YKL180W	RPL17A	PCG	0.967074	No	No	33.2	-0.447505	Ribosomal 60S subunit protein L17A; copurifies with the Dam1 complex (aka DASH complex); homologous to mammalian ribosomal protein L17 and bacterial L22; RPL17A has a paralog, RPL17B, that arose from the whole genome duplication; protein abundance increases in response to DNA replication stress
YIR010W	DSN1	PCG	0.966924	No	No	0.3	0.797943	Essential component of the MIND kinetochore complex; joins kinetochore subunits contacting DNA to those contacting microtubules; phosphorylation of Dsn1p promotes interaction between outer and inner kinetochore proteins; N-terminal end interacts with monopolin subunit Csm1p and is essential for meiotic but not mitotic chromosome segregation; important for chromosome segregation; complex consists …
chrXVI_775320_775623	chrXVI_775320_775623	Intergenic	0.966774	No	No	NA	NA	NA
YHR174W	ENO2	Antisens	0.966742	No	No	NA	-0.937031	Enolase II, a phosphopyruvate hydratase; catalyzes conversion of 2-phosphoglycerate to phosphoenolpyruvate during glycolysis and the reverse reaction during gluconeogenesis; expression induced in response to glucose; ENO2 has a paralog, ENO1, that arose from the whole genome duplication
YMR167W	MLH1	PCG	0.966729	No	No	0.2	0.764862	Protein required for mismatch repair in mitosis and meiosis; also required for crossing over during meiosis; forms a complex with Pms1p and Msh2p-Msh3p during mismatch repair; human homolog is associated with hereditary non-polyposis colon cancer
YMR075W	RCO1	Antisens	0.966714	No	No	NA	0.741512	Essential component of the Rpd3S histone deacetylase complex; interacts with Eaf3p
YEL007W	MIT1	Antisens	0.966704	No	No	NA	0.828224	Transcriptional regulator of pseudohyphal growth; protein with sequence similarity to S. pombe gti1+ (gluconate transport inducer 1) and C. albicans Wor1
YGL150C	INO80	PCG	0.966599	No	No	0.8	0.284401	ATPase and nucleosome spacing factor; subunit of complex containing actin and actin-related proteins that has chromatin remodeling activity and 3' to 5' DNA helicase activity in vitro; promotes nucleosome shifts in the 3 prime direction; has a role in modulating stress gene transcription
YIL047C	SYG1	Antisens	0.966503	No	No	NA	0.505138	Plasma membrane protein of unknown function; truncation and overexpression suppresses lethality of G-alpha protein deficiency
YCR024C	SLM5	Antisens	0.96644	No	No	NA	0.763632	Mitochondrial asparaginyl-tRNA synthetase
chrVI_15571_16864	chrVI_15571_16864	Intergenic	0.966407	No	No	NA	NA	NA
YGR013W	SNU71	PCG	0.966379	No	No	0.3	0.830516	Component of U1 snRNP required for mRNA splicing via spliceosome; yeast specific, no metazoan counterpart
YDR221W	GTB1	PCG	0.966271	No	No	0.2	0.857943	Glucosidase II beta subunit, forms a complex with alpha subunit Rot2p; involved in removal of two glucose residues from N-linked glycans during glycoprotein biogenesis in the ER; relocalizes from ER to cytoplasm upon DNA replication stress
YBL092W	RPL32	Antisens	0.966167	No	No	NA	-0.83793	Ribosomal 60S subunit protein L32; overexpression disrupts telomeric silencing; homologous to mammalian ribosomal protein L32, no bacterial homolog
YOR281C	PLP2	PCG	0.966135	No	No	1.49	0.26292	Protein that interacts with the CCT complex to stimulate actin folding; has similarity to phosducins; null mutant lethality is complemented by mouse phosducin-like protein MgcPhLP; CCT is short for chaperonin containing TCP-1; essential gene
YLL042C	ATG10	PCG	0.966109	No	No	0.8	0.887709	Conserved E2-like conjugating enzyme; mediates formation of the Atg12p-Atg5p conjugate, which is a critical step in autophagy
YOR185C	GSP2	Antisens	0.965901	No	No	NA	0.690224	GTP binding protein (mammalian Ranp homolog); involved in the maintenance of nuclear organization, RNA processing and transport; interacts with Kap121p, Kap123p and Pdr6p (karyophilin betas); not required for viability; protein abundance increases in response to DNA replication stress; GSP2 has a paralog, GSP1, that arose from the whole genome duplication
YKL157W	APE2	Antisens	0.965874	No	No	NA	0.543781	Aminopeptidase yscII; may have a role in obtaining leucine from dipeptide substrates; APE2 has a paralog, AAP1, that arose from the whole genome duplication
YMR090W	YMR090W	PCG	0.965847	No	No	1.1	0.940514	Putative protein of unknown function; similar to DTDP-glucose 4,6-dehydratases; GFP-fusion protein localizes to the cytoplasm; up-regulated in response to the fungicide mancozeb; not essential for viability
YPR190C	RPC82	PCG	0.965801	No	No	0.8	0.293675	RNA polymerase III subunit C82
YNL327W	EGT2	Antisens	0.965797	No	No	NA	-0.490039	Glycosylphosphatidylinositol (GPI)-anchored cell wall endoglucanase; required for proper cell separation after cytokinesis; expression is activated by Swi5p and tightly regulated in a cell cycle-dependent manner
YCR015C	YCR015C	Antisens	0.965768	No	No	NA	0.698905	Putative protein of unknown function; YCR015C is not an essential gene
YKR036C	CAF4	PCG	0.965753	No	Yes	0.4	0.582651	WD40 repeat-containing protein associated with the CCR4-NOT complex; interacts in a Ccr4p-dependent manner with Ssn2p; also interacts with Fis1p, Mdv1p and Dnm1p and plays a role in mitochondrial fission; CAF4 has a paralog, MDV1, that arose from the whole genome duplication
YEL021W	URA3	Antisens	0.965703	No	No	NA	-0.0285906	Orotidine-5'-phosphate (OMP) decarboxylase; catalyzes the sixth enzymatic step in the de novo biosynthesis of pyrimidines, converting OMP into uridine monophosphate (UMP); converts 5-FOA into 5-fluorouracil, a toxic compound
YHL030W	ECM29	PCG	0.9656	No	Yes	0.6	0.405006	Scaffold protein; assists in association of the proteasome core particle with the regulatory particle; inhibits proteasomal ATPase activity; degraded by the mature proteasome after assembly; contains HEAT-like repeats; protein increases in abundance and relocalizes from nucleus to cytoplasm upon DNA replication stress
chrIV_784352_784728	chrIV_784352_784728	Intergenic	0.9656	No	No	NA	NA	NA
YBR109C	CMD1	PCG	0.965596	No	No	8.34	0.442945	Calmodulin; Ca++ binding protein that regulates Ca++ independent processes (mitosis, bud growth, actin organization, endocytosis, etc.) and Ca++ dependent processes (stress-activated pathways), targets include Nuf1p, Myo2p and calcineurin
YHR010W	RPL27A	Antisens	0.965565	No	No	NA	NA	Ribosomal 60S subunit protein L27A; homologous to mammalian ribosomal protein L27, no bacterial homolog; RPL27A has a paralog, RPL27B, that arose from the whole genome duplication
YHR204W	MNL1	Antisens	0.965535	No	No	NA	0.398072	Alpha-1,2-specific exomannosidase of the endoplasmic reticulum; in complex with Pdi1p, generates a Man7GlcNac2 oligosaccharide signal on glycoproteins destined for ubiquitin-proteasome degradation
YLR058C	SHM2	PCG	0.965464	No	No	13.14	0.31497	Cytosolic serine hydroxymethyltransferase; converts serine to glycine plus 5,10 methylenetetrahydrofolate; major isoform involved in generating precursors for purine, pyrimidine, amino acid, and lipid biosynthesis
YNL142W	MEP2	Antisens	0.965357	No	No	NA	0.783364	Ammonium permease involved in regulation of pseudohyphal growth; belongs to a ubiquitous family of cytoplasmic membrane proteins that transport only ammonium (NH4+); expression is under the nitrogen catabolite repression regulation
YIR003W	AIM21	Antisens	0.96533	No	No	NA	0.808601	Protein of unknown function; involved in mitochondrial migration along actin filament; may interact with ribosomes; GFP-fusion protein colocalizes with Sac1p to the actin cytoskeleton
YLR138W	NHA1	PCG	0.965253	No	No	0.7	0.544088	Na+/H+ antiporter; involved in sodium and potassium efflux through the plasma membrane; required for alkali cation tolerance at acidic pH
YBR065C	ECM2	PCG	0.965148	No	No	0.1	0.934342	Pre-mRNA splicing factor; facilitates the cooperative formation of U2/U6 helix II in association with stem II in the spliceosome, function may be regulated by Slu7p
YGL205W	POX1	Antisens	0.965128	No	No	NA	0.846273	Fatty-acyl coenzyme A oxidase; involved in the fatty acid beta-oxidation pathway; localized to the peroxisomal matrix
YOR081C	TGL5	Antisens	0.965065	No	No	NA	0.68446	Bifunctional triacylglycerol lipase and LPA acyltransferase; lipid particle-localized triacylglycerol (TAG) lipase involved in triacylglycerol mobilization; catalyzes acylation of lysophosphatidic acid (LPA); potential Cdc28p substrate; TGL5 has a paralog, TGL4, that arose from the whole genome duplication
YDL122W	UBP1	Antisens	0.964986	No	No	NA	0.387004	Ubiquitin-specific protease; removes ubiquitin from ubiquitinated proteins; cleaves at the C terminus of ubiquitin fusions irrespective of their size; capable of cleaving polyubiquitin chains
YER110C	KAP123	Antisens	0.96491	No	No	NA	-0.2584	Karyopherin beta; mediates nuclear import of ribosomal proteins prior to assembly into ribosomes and import of histones H3 and H4; localizes to the nuclear pore, nucleus, and cytoplasm; exhibits genetic interactions with RAI1
YOR216C	RUD3	PCG	0.964876	No	No	0.4	0.310291	Golgi matrix protein; involved in the structural organization of the cis-Golgi; interacts genetically with COG3 and USO1
YMR259C	TRM732	Antisens	0.964859	No	No	NA	0.488484	Interacts with Trm7p for 2'-O-methylation of C32 of substrate tRNAs; green fluorescent protein (GFP)-fusion protein localizes to the cytoplasm; non-essential gene
YHR214C-B	YHR214C-B	Antisens	0.964799	No	No	NA	NA	Retrotransposon TYA Gag and TYB Pol genes; transcribed/translated as one unit; polyprotein is processed to make a nucleocapsid-like protein (Gag), reverse transcriptase (RT), protease (PR), and integrase (IN); similar to retroviral genes; YHR214C-B has a paralog, YAR070C, that arose from a segmental duplication
YHR214C-C	YHR214C-C	Antisens	0.964799	No	No	NA	NA	Retrotransposon TYA Gag gene co-transcribed with TYB Pol; translated as TYA or TYA-TYB polyprotein; Gag is a nucleocapsid protein that is the structural constituent of virus-like particles (VLPs); similar to retroviral Gag
YML106W	URA5	PCG	0.964713	No	No	12.7	-0.1082	Major orotate phosphoribosyltransferase (OPRTase) isozyme; catalyzes the fifth enzymatic step in de novo biosynthesis of pyrimidines, converting orotate into orotidine-5'-phosphate; URA5 has a paralog, URA10, that arose from the whole genome duplication
YHL014C	YLF2	Antisens	0.964404	No	No	NA	0.459387	Protein of unknown function; has weak similarity to E. coli GTP-binding protein gtp1; the authentic, non-tagged protein is detected in highly purified mitochondria in high-throughput studies
YBL007C	SLA1	Antisens	0.964347	No	No	NA	0.208697	Cytoskeletal protein binding protein; required for assembly of the cortical actin cytoskeleton; interacts with proteins regulating actin dynamics and proteins required for endocytosis; found in the nucleus and cell cortex; has 3 SH3 domains
YBR121C	GRS1	PCG	0.964292	No	Yes	7.62	-0.341005	Cytoplasmic and mitochondrial glycyl-tRNA synthase; ligates glycine to the cognate anticodon-bearing tRNA; transcription termination factor that may interact with the 3'-end of pre-mRNA to promote 3'-end formation; GRS1 has a paralog, GRS2, that arose from the whole genome duplication
YBR121C-A	YBR121C-A	PCG	0.964292	No	No	NA	-0.334276	Dubious open reading frame; unlikely to encode a functional protein, based on available experimental and comparative sequence data; completely contained within the verified gene GRS1; identified by expression profiling and mass spectrometry
YGR254W	ENO1	Antisens	0.964282	No	No	NA	-0.67577	Enolase I, a phosphopyruvate hydratase; catalyzes conversion of 2-phosphoglycerate to phosphoenolpyruvate during glycolysis and the reverse reaction during gluconeogenesis; expression repressed in response to glucose; protein abundance increases in response to DNA replication stress; ENO1 has a paralog, ENO2, that arose from the whole genome duplication
YIL075C	RPN2	PCG	0.964064	No	No	3.29	0.347259	Subunit of the 26S proteasome; substrate of the N-acetyltransferase Nat1p; protein abundance increases in response to DNA replication stress
YMR108W	ILV2	PCG	0.964016	No	No	3.9	-0.106431	Acetolactate synthase; catalyses the first common step in isoleucine and valine biosynthesis and is the target of several classes of inhibitors, localizes to the mitochondria; expression of the gene is under general amino acid control
YOR371C	GPB1	Antisens	0.963956	No	No	NA	0.711525	Multistep regulator of cAMP-PKA signaling; inhibits PKA downstream of Gpa2p and Cyr1p, thereby increasing cAMP dependency; promotes ubiquitin-dependent proteolysis of Ira2p; regulated by G-alpha protein Gpa2p; GPB1 has a paralog, GPB2, that arose from the whole genome duplication
YLL048C	YBT1	Antisens	0.963928	No	No	NA	0.460354	Transporter of the ATP-binding cassette (ABC) family; involved in bile acid transport; negative regulator of vacuole fusion; regulates release of lumenal Ca2+ stores; similar to mammalian bile transporters; YBT1 has a paralog, VMR1, that arose from the whole genome duplication
YLR051C	FCF2	Antisens	0.963886	No	No	NA	0.16071	Nucleolar protein involved in the early steps of 35S rRNA processing; interacts with Faf1p; member of a transcriptionally co-regulated set of genes called the RRB regulon; essential gene
chrIV_1493158_1494438	chrIV_1493158_1494438	Intergenic	0.963812	No	No	NA	NA	NA
YAR035W	YAT1	Antisens	0.963808	No	No	NA	-0.296217	Outer mitochondrial carnitine acetyltransferase; minor ethanol-inducible enzyme involved in transport of activated acyl groups from the cytoplasm into the mitochondrial matrix; phosphorylated
chrXII_633496_634114	chrXII_633496_634114	Intergenic	0.963756	No	No	NA	NA	NA
YIL097W	FYV10	PCG	0.963682	No	No	0.1	1.00208	Subunit of GID complex; involved in proteasome-dependent catabolite inactivation of gluconeogenic enzymes FBPase, PEPCK, and c-MDH; forms dimer with Rmd5p that is then recruited to GID Complex by Gid8p; contains a degenerate RING finger motif needed for GID complex ubiquitin ligase activity in vivo, as well as CTLH and CRA domains; plays role in anti-apoptosis; required for survival upon exposure…
YPL273W	SAM4	PCG	0.963421	No	No	6.2	-0.0055839	S-adenosylmethionine-homocysteine methyltransferase; functions along with Mht1p in the conversion of S-adenosylmethionine (AdoMet) to methionine to control the methionine/AdoMet ratio; SAM4 has a paralog, YMR321C, that arose from a single-locus duplication
YHR131C	YHR131C	Antisens	0.963394	No	No	NA	0.757804	Putative protein of unknown function; GFP-fusion protein localizes to the cytoplasm; overexpression causes cell cycle delay or arrest; contains a PH domain and binds phosphatidylinositols and other lipids in a large-scale study; YHR131C has a paralog, YNL144C, that arose from the whole genome duplication
YPR164W	MMS1	Antisens	0.963313	No	No	NA	0.516853	Subunit of E3 ubiquitin ligase complex involved in replication repair; stabilizes protein components of the replication fork such as the fork-pausing complex and leading strand polymerase, preventing fork collapse and promoting efficient recovery during replication stress; regulates Ty1 transposition; involved with Rtt101p in nonfunctional rRNA decay
YER024W	YAT2	Antisens	0.96321	No	No	NA	0.817226	Carnitine acetyltransferase; has similarity to Yat1p, which is a carnitine acetyltransferase associated with the mitochondrial outer membrane
YER149C	PEA2	PCG	0.963116	No	No	0.6	0.476526	Coiled-coil 12S polarisome subunit; required for polarity establishment, apical bud growth, shmoo formation during mating, and filamentous differentiation; involved in the localization of Bni1p at sites of polarized growth, thereby controlling the polarized assembly of actin cables; role in apical growth affects diploid-specific bipolar bud site selection; retains Slt2p at the bud tip to regulate…
YER025W	GCD11	PCG	0.963098	No	No	6.06	-0.28286	Gamma subunit of the translation initiation factor eIF2; involved in the identification of the start codon; binds GTP when forming the ternary complex with GTP and tRNAi-Met; mutations in human ortholog cause X-linked intellectual disability (XLID)
YPL045W	VPS16	PCG	0.963084	No	No	0.2	0.678432	Subunit of the HOPS and the CORVET complexes; part of the Class C Vps complex essential for membrane docking and fusion at Golgi-to-endosome and endosome-to-vacuole protein transport stages
YNL030W	HHF2	PCG	0.963073	No	No	21.25	-0.356777	Histone H4; core histone protein required for chromatin assembly and chromosome function; one of two identical histone proteins (see also HHF1); contributes to telomeric silencing; N-terminal domain involved in maintaining genomic integrity
chrII_407303_409023	chrII_407303_409023	Intergenic	0.963059	No	No	NA	NA	NA
YDR403W	DIT1	Antisens	0.962961	No	No	NA	0.594013	Sporulation-specific enzyme required for spore wall maturation; involved in the production of a soluble LL-dityrosine-containing precursor of the spore wall; transcripts accumulate at the time of prospore enclosure
YIL092W	YIL092W	PCG	0.962896	No	No	0.1	0.877794	Putative protein of unknown function; green fluorescent protein (GFP)-fusion protein localizes to the cytoplasm and to the nucleus
YAR050W	FLO1	Antisens	0.962845	No	No	NA	0.940771	Lectin-like protein involved in flocculation; cell wall protein that binds mannose chains on the surface of other cells, confers floc-forming ability that is chymotrypsin sensitive and heat resistant; FLO1 has a paralog, FLO5, that arose from a segmental duplication
YDR160W	SSY1	PCG	0.962648	No	Yes	0.4	0.791763	Component of the SPS plasma membrane amino acid sensor system; senses external amino acid concentration and transmits intracellular signals that result in regulation of expression of amino acid permease genes; other members are Ssy1p, Ptr3p, and Ssy5p
YPL151C	PRP46	PCG	0.962571	No	No	0.4	0.655871	Member of the NineTeen Complex (NTC); this complex contains Prp19p and stabilizes U6 snRNA in catalytic forms of the spliceosome containing U2, U5, and U6 snRNAs
YNL272C	SEC2	PCG	0.962499	No	Yes	0.6	0.420989	Guanyl-nucleotide exchange factor for the small G-protein Sec4p; essential for post-Golgi vesicle transport and for autophagy; associates with the exocyst, via exocyst subunit Sec15p, on secretory vesicles
YNL295W	YNL295W	PCG	0.962493	No	No	0.2	0.878975	Putative protein of unknown function
YLR454W	FMP27	Antisens	0.962431	No	No	NA	0.707817	Putative protein of unknown function; the authentic, non-tagged protein is detected in highly purified mitochondria in high-throughput studies
YDR097C	MSH6	Antisens	0.962219	No	No	NA	0.331035	Protein required for mismatch repair in mitosis and meiosis; forms a complex with Msh2p to repair both single-base & insertion-deletion mispairs; also involved in interstrand cross-link repair; potentially phosphorylated by Cdc28p
YNL193W	YNL193W	Antisens	0.962127	No	No	NA	0.69559	Putative protein of unknown function; exhibits a two-hybrid interaction with Yhr151cp in a large-scale analysis
YGL085W	LCL3	PCG	0.962117	No	No	0.6	0.631171	Putative protein of unknown function; mutant has long chronological lifespan; has homology to Staphylococcus aureus nuclease; GFP-fusion protein localizes to mitochondria; is induced in response to the DNA-damaging agent MMS
YDR413C	YDR413C	PCG	0.962082	No	No	1.35	0.597913	Dubious open reading frame; unlikely to encode a functional protein, based on available experimental and comparative sequence data; overlaps the essential uncharacterized ORF YDR412W that is implicated in rRNA processing
YNR060W	FRE4	Antisens	0.962009	No	No	NA	0.593915	Ferric reductase; reduces a specific subset of siderophore-bound iron prior to uptake by transporters; expression induced by low iron levels
YAL013W	DEP1	Antisens	0.961983	No	No	NA	0.431219	Component of the Rpd3L histone deacetylase complex; required for diauxic shift-induced histone H2B deposition onto rDNA genes; transcriptional modulator involved in regulation of structural phospholipid biosynthesis genes and metabolically unrelated genes, as well as maintenance of telomeres, mating efficiency, and sporulation
YBL045C	COR1	Antisens	0.961926	No	No	NA	1.04053	Core subunit of the ubiquinol-cytochrome c reductase complex; the ubiquinol-cytochrome c reductase complex (bc1 complex) is a component of the mitochondrial inner membrane electron transport chain
YDR254W	CHL4	PCG	0.961868	No	No	0.1	0.920635	Outer kinetochore protein required for chromosome stability; involved in new kinetochore assembly and sister chromatid cohesion; peripheral component of the Ctf19 kinetochore complex that interacts with Ctf19p, Ctf3p, Iml3p and Mif2p; required for the spindle assembly checkpoint; orthologous to human centromere constitutive-associated network (CCAN) subunit CENP-N and fission yeast mis15
YKR103W	NFT1	Antisens	0.961848	No	No	NA	0.789206	Putative transporter of the MRP subfamily; adjacent ORFs YKR103W and YKR104W are merged in different strain backgrounds; MRP stands for multidrug resistance-associated protein
YHR085W	IPI1	PCG	0.961826	No	No	1.3	0.370535	Component of the Rix1 complex and possibly pre-replicative complexes; required for processing of ITS2 sequences from 35S pre-rRNA; component of the pre-60S ribosomal particle with the dynein-related AAA-type ATPase Mdn1p; required for pre-replicative complex (pre-RC) formation and maintenance during DNA replication licensing; relocalizes to the cytosol in response to hypoxia; essential gene
snR51	SNR51	ncRNA	0.961794	Yes	Yes	NA	0.473493	C/D box small nucleolar RNA (snoRNA); guides 2'-O-methylation of large subunit (LSU) rRNA at position U2729 and small subunit (SSU) rRNA at position A100
snR70	SNR70	ncRNA	0.961794	Yes	Yes	NA	2.08308	C/D box small nucleolar RNA (snoRNA); predicted to guide 2'-O-methylation of small subunit (SSU) rRNA at position C1639
YHR097C	YHR097C	Antisens	0.961775	No	No	NA	1.29123	Putative protein of unknown function; green fluorescent protein (GFP)-fusion protein localizes to the cytoplasm and the nucleus; YHR097C has a paralog, PAL1, that arose from the whole genome duplication
YNL273W	TOF1	Antisens	0.961751	No	No	NA	0.590461	Subunit of a replication-pausing checkpoint complex; Tof1p-Mrc1p-Csm3p acts at the stalled replication fork to promote sister chromatid cohesion after DNA damage, facilitating gap repair of damaged DNA; interacts with the MCM helicase; relocalizes to the cytosol in response to hypoxia
YPR161C	SGV1	PCG	0.96175	No	No	0.3	0.469632	Cyclin (Bur2p)-dependent protein kinase; functions in transcriptional regulation; phosphorylates the carboxy-terminal domain of Rpo21p and the C-terminal repeat domain of Spt5p; regulated by Cak1p; similar to metazoan CDK9 proteins
YMR125W	STO1	Antisens	0.961641	No	No	NA	NA	Large subunit of the nuclear mRNA cap-binding protein complex; interacts with Npl3p to carry nuclear poly(A)+ mRNA to cytoplasm; also involved in nuclear mRNA degradation and telomere maintenance; orthologous to mammalian CBP80
YLR187W	SKG3	PCG	0.961616	No	Yes	0.3	0.988996	Protein of unknown function; green fluorescent protein (GFP)-fusion protein localizes to the cell periphery, cytoplasm, bud, and bud neck; potential Cdc28p substrate; similar to Skg4p; relocalizes from bud neck to cytoplasm upon DNA replication stress; SKG3 has a paralog, CAF120, that arose from the whole genome duplication
YJL106W	IME2	Antisens	0.961596	No	No	NA	0.834262	Serine/threonine protein kinase involved in activation of meiosis; associates with Ime1p and mediates its stability, activates Ndt80p; IME2 expression is positively regulated by Ime1p
YOR055W	YOR055W	PCG	0.961558	No	No	1.49	0.854438	Dubious open reading frame; unlikely to encode a functional protein, based on available experimental and comparative sequence data
YKL163W	PIR3	Antisens	0.96155	No	No	NA	2.32655	O-glycosylated covalently-bound cell wall protein; required for cell wall stability; expression is cell cycle regulated, peaking in M/G1 and also subject to regulation by the cell integrity pathway; coding sequence contains length polymorphisms in different strains; PIR3 has a paralog, HSP150, that arose from the whole genome duplication
YGR093W	YGR093W	PCG	0.961283	No	No	1.15	0.518256	Nuclear protein of unconfirmed function; relocalizes to the cytosol in response to hypoxia
YPR102C	RPL11A	PCG	0.961268	No	Yes	33.66	-0.456389	Ribosomal 60S subunit protein L11A; expressed at twice the level of Rpl11Bp; involved in ribosomal assembly; depletion causes degradation of 60S proteins and RNA; homologous to mammalian ribosomal protein L11 and bacterial L5; RPL11A has a paralog, RPL11B, that arose from the whole genome duplication
YBR009C	HHF1	PCG	0.961237	No	No	15.16	0.382676	Histone H4; core histone protein required for chromatin assembly and chromosome function; one of two identical histone proteins (see also HHF2); contributes to telomeric silencing; N-terminal domain involved in maintaining genomic integrity
YOR247W	SRL1	PCG	0.961233	No	No	8.9	0.362306	Mannoprotein that exhibits a tight association with the cell wall; required for cell wall stability in the absence of GPI-anchored mannoproteins; has a high serine-threonine content; expression is induced in cell wall mutants; SRL1 has a paralog, SVS1, that arose from the whole genome duplication
YOR248W	YOR248W	PCG	0.961233	No	No	5.2	0.280469	Dubious open reading frame; unlikely to encode a functional protein, based on available experimental and comparative sequence data
YHR074W	QNS1	Antisens	0.961163	No	No	NA	0.289633	Glutamine-dependent NAD(+) synthetase; essential for the formation of NAD(+) from nicotinic acid adenine dinucleotide
YDR018C	YDR018C	Antisens	0.961122	No	No	NA	0.836581	Probable membrane protein with three predicted transmembrane domains; similar to C. elegans F55A11.5 and maize 1-acyl-glycerol-3-phosphate acyltransferase; YDR018C has a paralog, CST26, that arose from the whole genome duplication
YBR218C	PYC2	PCG	0.961113	No	No	2.4	-0.0532676	Pyruvate carboxylase isoform; cytoplasmic enzyme that converts pyruvate to oxaloacetate; differentially regulated than isoform Pyc1p; mutations in the human homolog are associated with lactic acidosis; PYC2 has a paralog, PYC1, that arose from the whole genome duplication
YDR073W	SNF11	Antisens	0.96097	No	No	NA	0.974548	Subunit of the SWI/SNF chromatin remodeling complex; involved in transcriptional regulation; interacts with a highly conserved 40-residue sequence of Snf2p; relocates to the cytosol under hypoxic conditions
chrVIII_521877_525252	chrVIII_521877_525252	Intergenic	0.960907	No	No	NA	NA	NA
YJR006W	POL31	Antisens	0.960764	No	No	NA	0.734487	Subunit of DNA polymerase delta (polymerase III); essential for cell viability; involved in DNA replication and DNA repair; relocalizes to the cytosol in response to hypoxia
YDL223C	HBT1	Antisens	0.960751	No	No	NA	1.24796	Shmoo tip protein, substrate of Hub1p ubiquitin-like protein; mutants are defective for mating projection formation, thereby implicating Hbt1p in polarized cell morphogenesis; HBT1 has a paralog, YNL195C, that arose from the whole genome duplication
chrXII_855982_856301	chrXII_855982_856301	Intergenic	0.960724	No	No	NA	NA	NA
YOR125C	CAT5	PCG	0.960706	No	No	NA	0.540697	Protein required for ubiquinone (Coenzyme Q) biosynthesis; localizes to the matrix face of the mitochondrial inner membrane in a large complex with ubiquinone biosynthetic enzymes; required for gluconeogenic gene activation
YMR186W	HSC82	Antisens	0.960617	No	No	NA	-0.58474	Cytoplasmic chaperone of the Hsp90 family; plays a role in determining prion variants; redundant in function and nearly identical with Hsp82p, and together they are essential; expressed constitutively at 10-fold higher basal levels than HSP82 and induced 2-3 fold by heat shock; contains two acid-rich unstructured regions that promote the solubility of chaperone-substrate complexes; HSC82 has a pa…
YIR020C-B	YIR020C-B	PCG	0.960541	No	No	NA	0.442793	Dubious open reading frame; unlikely to encode a functional protein, based on available experimental and comparative sequence data; partially overlaps verified ORF MRS1
YHR102W	KIC1	PCG	0.960411	No	Yes	0.6	0.711151	Protein kinase of the PAK/Ste20 family, required for cell integrity; physically interacts with Cdc31p (centrin), which is a component of the spindle pole body; part of the RAM network that regulates cellular polarity and morphogenesis
chrVIII_34215_35113	chrVIII_34215_35113	Intergenic	0.960338	No	No	NA	NA	NA
YPL022W	RAD1	PCG	0.960309	No	No	0.6	0.843156	Single-stranded DNA endonuclease (with Rad10p); cleaves single-stranded DNA during nucleotide excision repair and double-strand break repair; subunit of Nucleotide Excision Repair Factor 1 (NEF1); homolog of human XPF protein
YLR258W	GSY2	PCG	0.960273	No	No	1.2	0.786158	Glycogen synthase; expression induced by glucose limitation, nitrogen starvation, heat shock, and stationary phase; activity regulated by cAMP-dependent, Snf1p and Pho85p kinases as well as by the Gac1p-Glc7p phosphatase; GSY2 has a paralog, GSY1, that arose from the whole genome duplication; relocalizes from cytoplasm to plasma membrane upon DNA replication stress
YMR312W	ELP6	PCG	0.960215	No	No	0.9	0.353768	Subunit of hexameric RecA-like ATPase Elp456 Elongator subcomplex; which is required for modification of wobble nucleosides in tRNA; required for Elongator structural integrity
chrX_539399_540618	chrX_539399_540618	Intergenic	0.960175	No	No	NA	NA	NA
YNL051W	COG5	PCG	0.960156	No	No	0.4	0.639112	Component of the conserved oligomeric Golgi complex; a cytosolic tethering complex (Cog1p through Cog8p) that functions in protein trafficking to mediate fusion of transport vesicles to Golgi compartments
YOR243C	PUS7	PCG	0.960121	No	No	1.69	0.278581	Pseudouridine synthase; catalyzes pseudouridylation at positions 35 and 56 in U2 snRNA, position 50 in 5S rRNA, position 13 in cytoplasmic tRNAs, and position 35 in pre-tRNA(Tyr); conserved in archaea, vertebrates, and some bacteria
YBL037W	APL3	Antisens	0.959934	No	No	NA	0.598928	Alpha-adaptin; large subunit of the clathrin associated protein complex (AP-2); involved in vesicle mediated transport
YAR042W	SWH1	Antisens	0.959762	No	No	NA	0.215223	Protein similar to mammalian oxysterol-binding protein; contains ankyrin repeats; localizes to the Golgi and the nucleus-vacuole junction; SWH1 has a paralog, OSH2, that arose from the whole genome duplication
YMR233W	TRI1	Antisens	0.959751	No	No	NA	0.61299	Non-essential sumoylated protein of unknown function; similar to components of human SWI/SNF complex including SMRD3; green fluorescent protein (GFP)-fusion protein localizes to the cytoplasm, nucleus and nucleolus; TRI1 has a paralog, UAF30, that arose from the whole genome duplication
YGR160W	YGR160W	PCG	0.959712	No	No	0.2	-0.179869	Dubious open reading frame; unlikely to encode a functional protein, based on available experimental and comparative sequence data
YJL051W	IRC8	Antisens	0.959685	No	No	NA	0.750162	Bud tip localized protein of unknown function; mRNA is targeted to the bud by a She2p dependent transport system; mRNA is cell cycle regulated via Fkh2p, peaking in G2/M phase; null mutant displays increased levels of spontaneous Rad52p foc
YOR160W	MTR10	PCG	0.959541	No	No	0.9	0.478025	Nuclear import receptor; mediates the nuclear localization of proteins involved in mRNA-nucleus export; promotes dissociation of mRNAs from the nucleus-cytoplasm mRNA shuttling protein Npl3p; required for retrograde import of mature tRNAs; relocalizes from cytoplasm to the nuclear periphery upon DNA replication stress
chrI_175480_176714	chrI_175480_176714	Intergenic	0.959468	No	No	NA	NA	NA
YOR306C	MCH5	Antisens	0.959457	No	No	NA	0.566484	Plasma membrane riboflavin transporter; facilitates the uptake of vitamin B2; required for FAD-dependent processes; sequence similarity to mammalian monocarboxylate permeases, however mutants are not deficient in monocarboxylate transport
YLR233C	EST1	PCG	0.959369	Yes	Yes	0.2	0.595791	TLC1 RNA-associated factor involved in telomere length regulation; recruitment subunit of telomerase; has G-quadruplex promoting activity required for telomere elongation; possible role in activating telomere-bound Est2p-TLC1-RNA; EST1 has a paralog, EBS1, that arose from the whole genome duplication
YGR002C	SWC4	Antisens	0.95929	No	No	NA	0.675905	Component of the Swr1p complex that incorporates Htz1p into chromatin; component of the NuA4 histone acetyltransferase complex
YDR073W	SNF11	PCG	0.959192	No	No	0.4	0.974548	Subunit of the SWI/SNF chromatin remodeling complex; involved in transcriptional regulation; interacts with a highly conserved 40-residue sequence of Snf2p; relocates to the cytosol under hypoxic conditions
YCL024W	KCC4	PCG	0.959167	No	No	0.3	0.967168	Protein kinase of the bud neck involved in the septin checkpoint; associates with septin proteins, negatively regulates Swe1p by phosphorylation, shows structural homology to bud neck kinases Gin4p and Hsl1p; KCC4 has a paralog, GIN4, that arose from the whole genome duplication
YGR225W	AMA1	Antisens	0.959159	No	No	NA	0.851515	Activator of meiotic anaphase promoting complex (APC/C); Cdc20p family member; required for initiation of spore wall assembly; required for Clb1p degradation during meiosis; prevents premature assembly of the meiosis I spindle, required for DSB induced prophase I arrest
YNR054C	ESF2	PCG	0.959157	No	Yes	1	0.204032	Essential nucleolar protein involved in pre-18S rRNA processing; binds to RNA and stimulates ATPase activity of Dbp8; involved in assembly of the small subunit (SSU) processome
snR71	SNR71	ncRNA	0.95899	Yes	Yes	NA	0.50784	C/D box small nucleolar RNA (snoRNA); guides 2'-O-methylation of large subunit (LSU) rRNA at position A2946
YOR371C	GPB1	PCG	0.958952	No	No	0.3	0.711525	Multistep regulator of cAMP-PKA signaling; inhibits PKA downstream of Gpa2p and Cyr1p, thereby increasing cAMP dependency; promotes ubiquitin-dependent proteolysis of Ira2p; regulated by G-alpha protein Gpa2p; GPB1 has a paralog, GPB2, that arose from the whole genome duplication
YMR096W	SNZ1	PCG	0.958937	No	No	0.3	0.855766	Protein involved in vitamin B6 biosynthesis; member of a stationary phase-induced gene family; coregulated with SNO1; interacts with Sno1p and with Yhr198p, perhaps as a multiprotein complex containing other Snz and Sno proteins
YFR026C	ULI1	Antisens	0.958898	No	No	NA	0.962347	Putative protein of unknown function; involved in and induced by the endoplasmic reticulum unfolded protein response (UPR)
YKL030W	YKL030W	PCG	0.958849	No	No	3.17	-0.341664	Dubious open reading frame; unlikely to encode a functional protein, based on available experimental and comparative sequence data; not conserved in closely related Saccharomyces species; partially overlaps the verified gene MAE1
YKL031W	YKL031W	PCG	0.958849	No	No	3.17	0.472037	Dubious open reading frame; unlikely to encode a functional protein, based on available experimental and comparative sequence data; not conserved in closely related Saccharomyces species
YMR187C	YMR187C	PCG	0.958764	No	No	0.4	0.687342	Putative protein of unknown function; YMR187C is not an essential gene
YLR149C	YLR149C	Antisens	0.958711	No	No	NA	1.11712	Protein of unknown function; overexpression causes a cell cycle delay or arrest; null mutation results in a decrease in plasma membrane electron transport; YLR149C is not an essential gene; protein abundance increases in response to DNA replication stress
YPL216W	YPL216W	Antisens	0.958574	No	No	NA	0.697986	Putative protein of unknown function; not an essential gene; YPL216W has a paralog, ITC1, that arose from the whole genome duplication
YLL036C	PRP19	Antisens	0.958552	No	No	NA	0.495524	Splicing factor associated with the spliceosome; contains a U-box, a motif found in a class of ubiquitin ligases, and a WD40 domain; relocalizes to the cytosol in response to hypoxia
YLR342W	FKS1	PCG	0.958534	No	Yes	5.68	-0.050726	Catalytic subunit of 1,3-beta-D-glucan synthase; functionally redundant with alternate catalytic subunit Gsc2p; binds to regulatory subunit Rho1p; involved in cell wall synthesis and maintenance; localizes to sites of cell wall remodeling; FKS1 has a paralog, GSC2, that arose from the whole genome duplication
chrXV_891570_892588	chrXV_891570_892588	Intergenic	0.95847	No	No	NA	NA	NA
YJR143C	PMT4	Antisens	0.958366	No	No	NA	0.0823537	Protein O-mannosyltransferase; transfers mannose residues from dolichyl phosphate-D-mannose to protein serine/threonine residues; appears to form homodimers in vivo and does not complex with other Pmt proteins; target for new antifungals
YBL059C-A	CMC2	PCG	0.958353	No	Yes	NA	0.155061	Protein involved in respiratory chain complex assembly or maintenance; protein of the mitochondrial intermembrane space; contains twin Cx9C motifs that can form coiled coil-helix-coiled-coil helix fold
YDR534C	FIT1	Antisens	0.958327	No	No	NA	1.20505	Mannoprotein that is incorporated into the cell wall; incorporated via a glycosylphosphatidylinositol (GPI) anchor; involved in the retention of siderophore-iron in the cell wall
YHR211W	FLO5	Antisens	0.958232	No	No	NA	0.890178	Lectin-like cell wall protein (flocculin) involved in flocculation; binds mannose chains on the surface of other cells, confers floc-forming ability that is chymotrypsin resistant but heat labile; FLO5 has a paralog, FLO1, that arose from a segmental duplication
YBR275C	RIF1	PCG	0.958152	No	Yes	0.2	0.535799	Protein that binds to the Rap1p C-terminus; acts synergistically with Rif2p to help control telomere length and establish telomeric silencing; deletion results in telomere elongation
YMR044W	IOC4	Antisens	0.95815	No	No	NA	0.639454	Member of a complex (Isw1b) with Isw1p and Ioc2p; interacts directly with H3K36me3 nucleosomes through its PWWP domain to recruit the Isw1b complex to open reading frames in a Set2p-dependent manner; Isw1b exhibits nucleosome-stimulated ATPase activity and acts within coding regions to coordinate transcription elongation with termination and processing
YDL070W	BDF2	PCG	0.958096	No	Yes	1.29	0.921381	Protein involved in transcription initiation; acts at TATA-containing promoters; associates with the basal transcription factor TFIID; contains two bromodomains; corresponds to the C-terminal region of mammalian TAF1; redundant with Bdf1p; protein abundance increases in response to DNA replication stress; BDF2 has a paralog, BDF1, that arose from the whole genome duplication
YPR112C	MRD1	PCG	0.958094	No	No	1.75	0.181922	Essential conserved small ribosomal subunit (40s) synthesis factor; component of the 90S preribosome; required for production of 18S rRNA and small ribosomal subunit; contains five consensus RNA-binding domains and binds to the pre-rRNA at two sites within the 18S region
YGR038C-A	YGR038C-A	Antisens	0.957989	No	No	NA	NA	Retrotransposon TYA Gag gene co-transcribed with TYB Pol; translated as TYA or TYA-TYB polyprotein; Gag is a nucleocapsid protein that is the structural constituent of virus-like particles (VLPs); similar to retroviral Gag
YGR038C-B	YGR038C-B	Antisens	0.957989	No	No	NA	NA	Retrotransposon TYA Gag and TYB Pol genes; transcribed/translated as one unit; polyprotein is processed to make a nucleocapsid-like protein (Gag), reverse transcriptase (RT), protease (PR), and integrase (IN); similar to retroviral genes
YKL104C	GFA1	PCG	0.957977	No	Yes	2.38	0.925614	Glutamine-fructose-6-phosphate amidotransferase; catalyzes the formation of glucosamine-6-P and glutamate from fructose-6-P and glutamine in the first step of chitin biosynthesis; GFA1 has a paralogous region, comprising ORFs YMR084W-YMR085W, that arose from the whole genome duplication
YCL014W	BUD3	PCG	0.957973	No	No	0.1	0.661817	Protein involved in bud-site selection; required for axial budding pattern; localizes with septins to bud neck in mitosis and may constitute an axial landmark for next round of budding
YDR077W	SED1	Antisens	0.957925	No	No	NA	0.245608	Major stress-induced structural GPI-cell wall glycoprotein; associates with translating ribosomes, possible role in mitochondrial genome maintenance; ORF contains two distinct variable minisatellites; SED1 has a paralog, SPI1, that arose from the whole genome duplication
YGR187C	HGH1	PCG	0.957678	No	No	2.2	0.0744143	Nonessential protein of unknown function; predicted to be involved in ribosome biogenesis; green fluorescent protein (GFP)-fusion protein localizes to the cytoplasm; similar to mammalian BRP16 (Brain protein 16); relative distribution to the nucleus increases upon DNA replication stress
YCRWomega3	YCRWomega3	Antisens	0.957639	No	No	NA	NA	Ty5 LTR
YDR406W	PDR15	Antisens	0.957636	No	No	NA	0.368861	Plasma membrane ATP binding cassette (ABC) transporter; multidrug transporter and general stress response factor implicated in cellular detoxification; regulated by Pdr1p, Pdr3p and Pdr8p; promoter contains a PDR responsive element; PDR15 has a paralog, PDR5, that arose from the whole genome duplication
snR39	SNR39	ncRNA	0.957634	Yes	Yes	NA	-0.393849	C/D box small nucleolar RNA (snoRNA); guides 2'-O-methylation of large subunit (LSU) rRNA at position A807
YER114C	BOI2	PCG	0.957633	No	No	0.6	0.469583	Protein implicated in polar growth, functionally redundant with Boi1p; interacts with bud-emergence protein Bem1p; contains an SH3 (src homology 3) domain and a PH (pleckstrin homology) domain; BOI2 has a paralog, BOI1, that arose from the whole genome duplication
YOR155C	ISN1	PCG	0.957604	No	No	0.3	0.462212	Inosine 5'-monophosphate (IMP)-specific 5'-nucleotidase; catalyzes the breakdown of IMP to inosine; responsible for production of nicotinamide riboside and nicotinic acid riboside; expression positively regulated by nicotinic acid and glucose availability; does not show similarity to known 5'-nucleotidases from other organisms
YDR097C	MSH6	PCG	0.957506	No	No	0.8	0.331035	Protein required for mismatch repair in mitosis and meiosis; forms a complex with Msh2p to repair both single-base & insertion-deletion mispairs; also involved in interstrand cross-link repair; potentially phosphorylated by Cdc28p
YER052C	HOM3	PCG	0.957424	No	No	1.87	0.15491	Aspartate kinase (L-aspartate 4-P-transferase); cytoplasmic enzyme that catalyzes the first step in the common pathway for methionine and threonine biosynthesis; expression regulated by Gcn4p and the general control of amino acid synthesis
YDL186W	YDL186W	Antisens	0.957379	No	No	NA	0.66396	Putative protein of unknown function; YDL186W is not an essential gene
YHR188C	GPI16	PCG	0.957255	No	Yes	2.07	0.502691	Subunit of the glycosylphosphatidylinositol transamidase complex; transmembrane protein; adds GPIs to newly synthesized proteins; human PIG-Tp homolog
chrXVI_587655_590140	chrXVI_587655_590140	Intergenic	0.957096	No	No	NA	NA	NA
YLR024C	UBR2	PCG	0.957039	No	No	0.2	0.621611	Cytoplasmic ubiquitin-protein ligase (E3); required for ubiquitylation of Rpn4p; mediates formation of a Mub1p-Ubr2p-Rad6p complex
YOR205C	GEP3	Antisens	0.956971	No	No	NA	0.596612	Protein required for mitochondrial ribosome small subunit biogenesis; null mutant is defective in respiration and in maturation of 15S rRNA; protein is localized to the mitochondrial inner membrane; null mutant interacts synthetically with prohibitin (Phb1p)
YNL078W	NIS1	Antisens	0.956717	No	No	NA	0.300941	Protein localized in the bud neck at G2/M phase; physically interacts with septins; possibly involved in a mitotic signaling network
YPL228W	CET1	PCG	0.956681	No	No	0.4	0.655657	RNA 5'-triphosphatase involved in mRNA 5' capping; subunit of the mRNA capping enzyme, which is a heterotetramer composed of a Cet1p homodimer and two molecules of the guanylyltransferase Ceg1p; Cet1p also has a role in regulation of RNA pol II pausing at promoter-proximal sites; interaction between Cet1p and Ceg1p is required for Ceg1p nuclear import; mammalian enzyme is a single bifunctional po…
YKR100C	SKG1	Antisens	0.95665	No	No	NA	0.842331	Transmembrane protein with a role in cell wall polymer composition; localizes on inner surface of plasma membrane at bud and in daughter cell; SKG1 has a paralog, AIM20, that arose from the whole genome duplication
YDR496C	PUF6	Antisens	0.956541	No	No	NA	0.111849	Pumilio-homology domain protein; binds the 3' UTR of ASH1 mRNA and represses its translation, resulting in proper asymmetric localization of ASH1 mRNA; required at post-transcriptional step for efficient retrotransposition; absence results in decreased Ty1 Gag:GFP protein levels; co-sediments with the 60S ribosomal subunit and is required for its biogenesis
YGR121C	MEP1	PCG	0.956517	No	No	0.6	0.795454	Ammonium permease; belongs to a ubiquitous family of cytoplasmic membrane proteins that transport only ammonium (NH4+); expression is under the nitrogen catabolite repression regulation; MEP1 has a paralog, MEP3, that arose from the whole genome duplication
YGR055W	MUP1	PCG	0.9565	No	No	3	0.412164	High affinity methionine permease; integral membrane protein with 13 putative membrane-spanning regions; also involved in cysteine uptake
YLR074C	BUD20	Antisens	0.956475	No	No	NA	0.446805	C2H2-type zinc finger protein required for ribosome assembly; shuttling factor which associates with pre-60S particles in the nucleus, accompanying them to the cytoplasm; cytoplasmic dissociation of Bud20p requires Drg1p; N-terminus harbors a nuclear localization signal (NLS) and a nuclear export signal (NES); cytoplasmic Bud20p is reimported by Kap123-dependent pathway; involved in bud-site sele…
YLR305C	STT4	PCG	0.956196	No	No	0.7	0.421496	Phosphatidylinositol-4-kinase; functions in the Pkc1p protein kinase pathway; required for normal vacuole morphology, cell wall integrity, and actin cytoskeleton organization
YDL222C	FMP45	PCG	0.956087	No	No	2.33	0.710939	Integral membrane protein localized to mitochondria; required for sporulation and maintaining sphingolipid content; similar to SUR7; FMP45 has a paralog, YNL194C, that arose from the whole genome duplication
YMR317W	YMR317W	Antisens	0.955961	No	No	NA	0.885289	Putative protein of unknown function; has some similarity to sialidase from Trypanosoma; YMR317W is not an essential gene
YGR063C	SPT4	PCG	0.955949	No	No	3.8	0.48318	Component of the universally conserved Spt4/5 complex (DSIF complex); the complex has multiple roles in concert with RNA polymerases I and II, including regulation of transcription elongation, RNA processing, quality control, and transcription-coupled DNA repair; Spt4p also localizes to kinetochores and heterochromatin and affects chromosome dynamics and silencing; required for transcription thro…
YDR421W	ARO80	Antisens	0.955831	No	No	NA	0.985943	Zinc finger transcriptional activator of the Zn2Cys6 family; activates transcription of aromatic amino acid catabolic genes in the presence of aromatic amino acids
YMR015C	ERG5	PCG	0.955826	No	No	2.1	0.48119	C-22 sterol desaturase; a cytochrome P450 enzyme that catalyzes the formation of the C-22(23) double bond in the sterol side chain in ergosterol biosynthesis; may be a target of azole antifungal drugs
YGL251C	HFM1	Antisens	0.955703	No	No	NA	NA	Meiosis specific DNA helicase; involved in the conversion of double-stranded breaks to later recombination intermediates and in crossover control; catalyzes the unwinding of Holliday junctions; has ssDNA and dsDNA stimulated ATPase activity
snR36	SNR36	ncRNA	0.955681	Yes	Yes	NA	0.658283	H/ACA box small nucleolar RNA (snoRNA); guides pseudouridylation of small subunit (SSU) rRNA at position U1187
YOR109W	INP53	PCG	0.955638	No	Yes	0.8	0.422868	Polyphosphatidylinositol phosphatase; dephosphorylates multiple phosphatidylinositol phosphates; involved in trans Golgi network-to-early endosome pathway; hyperosmotic stress causes translocation to actin patches; contains Sac1 and 5-ptase domains; INP53 has a paralog, INP52, that arose from the whole genome duplication
YHR197W	RIX1	PCG	0.955613	No	No	1.9	0.126019	Component of the Rix1 complex and possibly pre-replicative complexes; required for processing of ITS2 sequences from 35S pre-rRNA; component of the pre-60S ribosomal particle with the dynein-related AAA-type ATPase Mdn1p; required for pre-replicative complex (pre-RC) formation and maintenance during DNA replication licensing; relocalizes to the cytosol in response to hypoxia; essential gene
YJL214W	HXT8	PCG	0.95555	No	No	0.2	0.737839	Protein of unknown function with similarity to hexose transporters; expression is induced by low levels of glucose and repressed by high levels of glucose
YPR003C	YPR003C	Antisens	0.955541	No	No	NA	0.867655	Putative sulfate permease; physically interacts with Hsp82p; green fluorescent protein (GFP)-fusion protein localizes to the ER; YPR003C is not an essential gene
YOL059W	GPD2	PCG	0.955534	No	No	1.2	0.310668	NAD-dependent glycerol 3-phosphate dehydrogenase; expression is controlled by an oxygen-independent signaling pathway required to regulate metabolism under anoxic conditions; located in cytosol and mitochondria; constitutively active but is inactivated via phosphorylation by energy-stress responsive kinase SNF1; GPD2 has a paralog, GPD1, that arose from the whole genome duplication
YMR027W	YMR027W	PCG	0.955369	No	No	1.1	0.347252	Putative protein of unknown function; green fluorescent protein (GFP)-fusion protein localizes to the nucleus and cytoplasm; YMR027W is not an essential gene
YML028W	TSA1	PCG	0.955287	No	No	55	-0.305427	Thioredoxin peroxidase; acts as both a ribosome-associated and free cytoplasmic antioxidant; self-associates to form high-molecular weight chaperone complex under oxidative stress; deletion causes mutator phenotype; protein abundance increases and forms cytoplasmic foci during DNA replication stress; chaperone activity is essential for growth under zinc deficiency; required for telomere length ma…
YKL222C	YKL222C	PCG	0.955188	No	No	0.2	0.63231	Protein of unknown function; may interact with ribosomes, based on co-purification experiments; similar to transcriptional regulators from the zinc cluster (binuclear cluster) family; null mutant is sensitive to caffeine
chrIV_1330172_1331089	chrIV_1330172_1331089	Intergenic	0.954875	No	No	NA	NA	NA
YCR081W	SRB8	Antisens	0.954673	No	No	NA	0.740752	Subunit of the RNA polymerase II mediator complex; associates with core polymerase subunits to form the RNA polymerase II holoenzyme; essential for transcriptional regulation; involved in glucose repression
YLR413W	YLR413W	Antisens	0.954619	No	No	NA	-0.314364	Putative protein of unknown function; not an essential gene; YLR413W has a paralog, FAT3, that arose from the whole genome duplication
YHR075C	PPE1	PCG	0.954577	No	No	0.3	0.939818	Protein with carboxyl methyl esterase activity; may have a role in demethylation of the phosphoprotein phosphatase catalytic subunit; also identified as a small subunit mitochondrial ribosomal protein
YLR072W	YLR072W	PCG	0.954494	No	No	0.6	0.711866	Protein of unknown function; green fluorescent protein (GFP)-fusion protein localizes to the cytoplasm in a punctate pattern; not an esssential gene; YLR072W has a paralog, YFL042C, that arose from the whole genome duplication
YNL084C	END3	PCG	0.954448	No	No	1.59	0.585917	EH domain-containing protein involved in endocytosis; actin cytoskeletal organization and cell wall morphogenesis; forms a complex with Sla1p and Pan1p
YER019W	ISC1	PCG	0.954445	No	No	1.1	0.212958	Inositol phosphosphingolipid phospholipase C; mitochondrial membrane localized; hydrolyzes complex sphingolipids to produce ceramide; activates genes required for non-fermentable carbon source metabolism during the diauxic shift; activated by phosphatidylserine, cardiolipin, and phosphatidylglycerol; mediates Na+ and Li+ halotolerance
chrIV_147730_148052	chrIV_147730_148052	Intergenic	0.954405	No	No	NA	NA	NA
YHR135C	YCK1	PCG	0.954343	No	No	2.6	0.319008	Palmitoylated plasma membrane-bound casein kinase I isoform; shares redundant functions with Yck2p in morphogenesis, proper septin assembly, endocytic trafficking, and glucose sensing; stabilized by Sod1p binding in the presence of glucose and oxygen, causing glucose repression of respiratory metabolism; YCK1 has a paralog, YCK2, that arose from the whole genome duplication
YNL254C	RTC4	PCG	0.95434	No	No	0.4	0.692296	Protein of unknown function; null mutation suppresses cdc13-1 temperature sensitivity; (GFP)-fusion protein localizes to both the cytoplasm and the nucleus
YDR446W	ECM11	PCG	0.95421	No	No	1.35	1.06773	Meiosis-specific protein; component of the Synaptonemal Complex (SC) along with Gmc2p; required for efficient crossover formation and for the efficient loading of the SC transverse filament protein, Zip1p; is SUMOlytaed in a Gmc2p manner, and SUMOylation is required for its function in meiosis; GFP fusion protein is present in discrete clusters in the nucleus throughout mitosis; may be involved i…
YKL033W	TTI1	Antisens	0.954068	No	No	NA	0.593962	Subunit of the ASTRA complex, involved in chromatin remodeling; telomere length regulator involved in the stability or biogenesis of PIKKs such as TORC1; similar to S. pombe Tti1p; detected in highly purified mitochondria in high-throughput studies
YOL017W	ESC8	PCG	0.954067	No	No	0.2	0.804634	Protein involved in telomeric and mating-type locus silencing; interacts with Sir2p and also interacts with Gal11p, which is a component of the RNA pol II mediator complex; ESC8 has a paralog, IOC3, that arose from the whole genome duplication
YOL066C	RIB2	Antisens	0.954041	No	No	NA	0.64579	Bifunctional DRAP deaminase tRNA:pseudouridine synthase; the deaminase catalyzes the third step in riboflavin biosynthesis and the synthase catalyzes formation of pseudouridine at position 32 in cytoplasmic tRNAs; RIB2 has a paralog, PUS9, that arose from the whole genome duplication
YOL067C	RTG1	Antisens	0.954041	No	No	NA	0.626918	Transcription factor (bHLH) involved in interorganelle communication; contributes to communication between mitochondria, peroxisomes, and nucleus
chrIV_56487_57126	chrIV_56487_57126	Intergenic	0.953927	No	No	NA	NA	NA
YPL140C	MKK2	PCG	0.953869	No	No	0.3	0.74939	MAPKK involved in the protein kinase C signaling pathway; involved in control of cell integrity; upon activation by Bck1p phosphorylates downstream target, Slt2p; functionally redundant with Mkk1p; MKK2 has a paralog, MKK1, that arose from the whole genome duplication
YNL182C	IPI3	Antisens	0.953683	No	No	NA	0.28171	Component of the Rix1 complex and pre-replicative complexes (pre-RCs); required for processing of ITS2 sequences from 35S pre-rRNA; component of the pre-60S ribosomal particle with the dynein-related AAA-type ATPase Mdn1p; required for pre-RC formation and maintenance during DNA replication licensing; highly conserved protein which contains several WD40 motifs; IPI3 is an essential gene; other me…
YJR107W	YJR107W	PCG	0.953664	No	No	0.4	0.905184	Putative lipase
YHR002W	LEU5	PCG	0.953574	No	No	0.4	0.824249	Mitochondrial carrier protein; involved in the accumulation of CoA in the mitochondrial matrix; homolog of human Graves disease protein; does not encode an isozyme of Leu4p, as first hypothesized
YGR122W	YGR122W	Antisens	0.953448	No	No	NA	0.816579	Protein that may be involved in pH regulation; probable ortholog of A. nidulans PalC, which is involved in pH regulation and binds to the ESCRT-III complex; null mutant does not properly process Rim101p and has decreased resistance to rapamycin; GFP-fusion protein is cytoplasmic; relative distribution to cytoplasm increases upon DNA replication stress
YOL050C	YOL050C	PCG	0.953419	No	No	1.49	0.54812	Dubious open reading frame; unlikely to encode a functional protein, based on available experimental and comparative sequence data; overlaps verified gene GAL11; deletion confers sensitivity to 4-(N-(S-glutathionylacetyl)amino) phenylarsenoxide (GSAO)
YLR360W	VPS38	PCG	0.953415	No	No	0.2	0.659165	Part of a Vps34p phosphatidylinositol 3-kinase complex; functions in carboxypeptidase Y (CPY) sorting; binds Vps30p and Vps34p to promote production of phosphatidylinositol 3-phosphate (PtdIns3P) which stimulates kinase activity; required for overflow degradation of misfolded proteins when ERAD is saturated
YPL184C	MRN1	Antisens	0.953069	No	No	NA	0.534035	RNA-binding protein that may be involved in translational regulation; binds specific categories of mRNAs, including those that contain upstream open reading frames (uORFs) and internal ribosome entry sites (IRES); interacts genetically with chromatin remodelers and splicing factors, linking chromatin state, splicing and as a result mRNA maturation
YJL172W	CPS1	Antisens	0.953056	No	No	NA	0.366551	Vacuolar carboxypeptidase S; expression is induced under low-nitrogen conditions
YOL081W	IRA2	PCG	0.95301	No	Yes	0.9	0.569594	GTPase-activating protein; negatively regulates RAS by converting it from the GTP- to the GDP-bound inactive form, required for reducing cAMP levels under nutrient limiting conditions; similar to human neurofibromin; IRA2 has a paralog, IRA1, that arose from the whole genome duplication
YJL056C	ZAP1	Antisens	0.952947	No	No	NA	0.59328	Zinc-regulated transcription factor; binds to zinc-responsive promoters to induce transcription of certain genes in presence of zinc, represses other genes in low zinc; regulates its own transcription; contains seven zinc-finger domains
YPL074W	YTA6	Antisens	0.952886	No	No	NA	0.891518	Putative ATPase of the CDC48/PAS1/SEC18 (AAA) family; localized to the cortex of mother cells but not to daughter cells; relocalizes from cytoplasm to plasma membrane foci upon DNA replication stress
YDR324C	UTP4	Antisens	0.952825	No	No	NA	0.25123	Subunit of U3-containing 90S preribosome and SSU processome complexes; involved in production of 18S rRNA and assembly of small ribosomal subunit; member of t-Utp subcomplex involved with transcription of 35S rRNA transcript; Small Subunit processome is also known as SSU processome
YNL020C	ARK1	Antisens	0.952672	No	No	NA	0.832469	Serine/threonine protein kinase; involved in regulation of the cortical actin cytoskeleton; involved in control of endocytosis; ARK1 has a paralog, PRK1, that arose from the whole genome duplication
YER061C	CEM1	Antisens	0.952558	No	No	NA	0.69354	Mitochondrial beta-keto-acyl synthase; possible role in fatty acid synthesis; required for mitochondrial respiration
YLR293C	GSP1	Antisens	0.952408	No	No	NA	-0.380192	Ran GTPase; GTP binding protein (mammalian Ranp homolog) involved in the maintenance of nuclear organization, RNA processing and transport; regulated by Srm1p, Rna1p, Yrb1p, Yrb2p, Yrp4p, Yrb30p, Cse1p and Kap95p; GSP1 has a paralog, GSP2, that arose from the whole genome duplication
YKL210W	UBA1	PCG	0.952375	No	No	3.58	-0.244724	Ubiquitin activating enzyme (E1); involved in ubiquitin-mediated protein degradation and essential for viability; protein abundance increases in response to DNA replication stress
chrV_45861_47028	chrV_45861_47028	Intergenic	0.952324	No	No	NA	NA	NA
YGR067C	YGR067C	PCG	0.952272	No	No	1.21	0.275565	Putative protein of unknown function; contains a zinc finger motif similar to that of Adr1p
YBL024W	NCL1	PCG	0.952268	No	No	1.34	-0.0451104	S-adenosyl-L-methionine-dependent tRNA: m5C-methyltransferase; methylates cytosine to m5C at several positions in tRNAs and intron-containing pre-tRNAs; increases proportion of tRNALeu(CAA) with m5C at wobble position in response to hydrogen peroxide, causing selective translation of mRNA from genes enriched in TTG codon; loss of NCL1 confers hypersensitivity to oxidative stress; similar to Nop2p…
YIR012W	SQT1	PCG	0.95224	No	No	4.2	0.0589427	Protein involved in 60S ribosomal subunit assembly or modification; contains multiple WD repeats; interacts with Qsr1p in a two-hybrid assay; protein abundance increases in response to DNA replication stress
YHR164C	DNA2	Antisens	0.952201	No	No	NA	0.726114	Tripartite DNA replication factor; has single-stranded DNA-dependent ATPase, ATP-dependent nuclease, and helicase activities; tracking protein for flap cleavage during Okazaki fragment maturation; involved in DNA repair and processing of meiotic DNA double strand breaks; required for normal life span; component of telomeric chromatin, with cell-cycle dependent localization; required for telomeras…
YFL007W	BLM10	PCG	0.952188	No	No	0.81	0.267	Proteasome activator; binds the core proteasome (CP) and stimulates proteasome-mediated protein degradation by inducing gate opening; required for sequestering CP into proteasome storage granule (PSG) during quiescent phase and for nuclear import of CP in proliferating cells; required for resistance to bleomycin, may be involved in protecting against oxidative damage; similar to mammalian PA200
YLR442C	SIR3	Antisens	0.95218	No	No	NA	0.590004	Silencing protein; interacts with Sir2p and Sir4p, and histone H3 and H4 tails, to establish a transcriptionally silent chromatin state; required for spreading of silenced chromatin; recruited to chromatin through interaction with Rap1p; SIR3 has a paralog, ORC1, that arose from the whole genome duplication
YPL012W	RRP12	Antisens	0.952169	No	No	NA	-0.118555	Protein required for export of the ribosomal subunits; associates with the RNA components of the pre-ribosomes; has a role in nuclear import in association with Pse1p; also plays a role in the cell cycle and the DNA damage response; contains HEAT-repeats
YBR003W	COQ1	PCG	0.952163	No	Yes	0.8	0.619997	Hexaprenyl pyrophosphate synthetase; catalyzes the first step in ubiquinone (coenzyme Q) biosynthesis
chrVI_12399_12789	chrVI_12399_12789	Intergenic	0.952062	No	No	NA	NA	NA
chrXIV_14303_14692	chrXIV_14303_14692	Intergenic	0.952062	No	No	NA	NA	NA
chrIX_337034_339201	chrIX_337034_339201	Intergenic	0.952056	No	No	NA	NA	NA
YDR501W	PLM2	PCG	0.952024	No	No	0.1	0.96457	Putative transcription factor, contains Forkhead Associated domain; found associated with chromatin; target of SBF transcription factor; induced in response to DNA damaging agents and deletion of telomerase; PLM2 has a paralog, TOS4, that arose from the whole genome duplication
NME1	NME1	ncRNA	0.951983	No	Yes	NA	-0.48275	RNA component of RNase MRP; RNase MRP cleaves pre-rRNA and has a role in cell cycle-regulated degradation of daughter cell-specific mRNAs; human ortholog is implicated in cartilage-hair hypoplasia (CHH)
snR66	SNR66	ncRNA	0.951983	Yes	Yes	NA	-0.428653	C/D box small nucleolar RNA (snoRNA); guides 2'-O-methylation of large subunit (LSU) rRNA at position U2417
YPL222W	FMP40	PCG	0.951872	No	No	0.1	1.0016	Putative protein of unknown function; proposed to be involved in responding to environmental stresses; the authentic, non-tagged protein is detected in highly purified mitochondria in high-throughput studies
YJR005W	APL1	Antisens	0.951869	No	No	NA	0.597607	Beta-adaptin; large subunit of the clathrin associated protein complex (AP-2); involved in vesicle mediated transport; similar to mammalian beta-chain of the clathrin associated protein complex
YKL098W	MTC2	Antisens	0.951757	No	No	NA	0.620668	Protein of unknown function; mtc2 is synthetically sick with cdc13-1
YDR389W	SAC7	Antisens	0.951755	No	No	NA	0.853058	GTPase activating protein (GAP) for Rho1p; regulator of a Tor2p-mediated, Rho1p GTPase switch that controls organization of the actin cytoskeleton; negative regulator of the RHO1-PKC1-MAPK cell integrity (CWI) and membrane fluidity homeostasis signaling pathways; potential Cdc28p substrate; SAC7 has a paralog, BAG7, that arose from the whole genome duplication
YMR204C	INP1	PCG	0.95175	No	No	0.2	0.715873	Peripheral membrane protein of peroxisomes; involved in peroxisomal inheritance; recruitment to peroxisomes is mediated by interaction with Pex3p at the peroxisomal membrane
chrV_288662_290100	chrV_288662_290100	Intergenic	0.951742	No	No	NA	NA	NA
YPL242C	IQG1	Antisens	0.951682	No	No	NA	0.630942	Essential protein required for determination of budding pattern; promotes localization of axial markers Bud4p and Cdc12p and functionally interacts with Sec3p, localizes to the contractile ring during anaphase, member of the IQGAP family; relocalizes from bud neck to cytoplasm upon DNA replication stress
YBR267W	REI1	PCG	0.951664	No	No	1.29	0.244368	Cytoplasmic pre-60S factor; required for the correct recycling of shuttling factors Alb1, Arx1 and Tif6 at the end of the ribosomal large subunit biogenesis; involved in bud growth in the mitotic signaling network
YER144C	UBP5	Antisens	0.95159	No	No	NA	0.877968	Putative ubiquitin-specific protease; concentrates at the bud neck; UBP5 has a paralog, DOA4, that arose from the whole genome duplication
YGR204W	ADE3	PCG	0.951574	No	No	3.43	-0.38161	Cytoplasmic trifunctional enzyme C1-tetrahydrofolate synthase; involved in single carbon metabolism and required for biosynthesis of purines, thymidylate, methionine, and histidine; null mutation causes auxotrophy for adenine and histidine
YNL016W	PUB1	Antisens	0.951411	No	No	NA	-0.053618	Poly (A)+ RNA-binding protein; abundant mRNP-component protein that binds mRNA and is required for stability of many mRNAs; component of glucose deprivation induced stress granules, involved in P-body-dependent granule assembly; protein abundance increases in response to DNA replication stress
YER002W	NOP16	Antisens	0.951396	No	No	NA	0.376753	Constituent of 66S pre-ribosomal particles; involved in 60S ribosomal subunit biogenesis
YBR160W	CDC28	Antisens	0.951379	No	No	NA	0.700212	Cyclin-dependent kinase (CDK) catalytic subunit; master regulator of mitotic and meiotic cell cycles; alternately associates with G1 (CLNs), S and G2/M (CLBs) phase cyclins, which provide substrate specificity; regulates cell cycle and basal transcription, chromosome duplication and segregation, lipid biosynthesis, membrane trafficking, polarized growth, and morphogenesis; abundance increases in …
YOR132W	VPS17	PCG	0.951372	No	No	0.7	0.658202	Subunit of the membrane-associated retromer complex; essential for endosome-to-Golgi retrograde protein transport; peripheral membrane protein that assembles onto the membrane with Vps5p to promote vesicle formation; required for recruiting the retromer complex to the endosome membranes
YAL037W	YAL037W	PCG	0.951369	No	No	0.2	0.840851	Putative protein of unknown function; YAL037W has a paralog, YOR342C, that arose from the whole genome duplication
YEL020C	YEL020C	Antisens	0.951293	No	No	NA	0.614768	Protein of unknown function with low sequence identity to Pdc1p; mRNA identified as translated by ribosome profiling data
YPR117W	YPR117W	Antisens	0.951262	No	No	NA	0.998543	Putative protein of unknown function
chrIV_804654_806478	chrIV_804654_806478	Intergenic	0.951167	No	No	NA	NA	NA
YOR098C	NUP1	Antisens	0.951145	No	No	NA	0.270434	FG-nucleoporin component of central core of the nuclear pore complex; contributes directly to nucleocytoplasmic transport and maintenance of thenuclear pore complex (NPC) permeability barrier; possible karyopherin release factor that accelerates release of karyopherin-cargo complexes after transport across NPC; both NUP1 and NUP60 are homologous to human NUP153
YDR191W	HST4	Antisens	0.951118	No	No	NA	0.935294	Member of the Sir2 family of NAD(+)-dependent protein deacetylases; involved along with Hst3p in silencing at telomeres, cell cycle progression, radiation resistance, genomic stability and short-chain fatty acid metabolism
YDR273W	DON1	PCG	0.951108	No	No	0.3	0.844334	Meiosis-specific component of the spindle pole body; part of the leading edge protein (LEP) coat, forms a ring-like structure at the leading edge of the prospore membrane during meiosis II; DON1 has a paralog, CUE5, that arose from the whole genome
YML127W	RSC9	PCG	0.951101	No	No	2.4	0.507501	Component of the RSC chromatin remodeling complex; DNA-binding protein involved in the synthesis of rRNA and in transcriptional repression and activation of genes regulated by the Target of Rapamycin (TOR) pathway
YNL037C	IDH1	PCG	0.951073	No	No	2	0.102837	Subunit of mitochondrial NAD(+)-dependent isocitrate dehydrogenase; complex catalyzes the oxidation of isocitrate to alpha-ketoglutarate in the TCA cycle
YOL060C	MAM3	PCG	0.950925	No	No	0.7	0.663564	Protein required for normal mitochondrial morphology; has similarity to hemolysins
chrXIV_762732_765235	chrXIV_762732_765235	Intergenic	0.950866	No	No	NA	NA	NA
YDL095W	PMT1	PCG	0.950856	No	No	3.9	0.0343386	Protein O-mannosyltransferase of the ER membrane; transfers mannose from dolichyl phosphate-D-mannose to protein serine and threonine residues; 1 of 7 related proteins involved in O-glycosylation which is essential for cell wall rigidity; involved in ER quality control; amino terminus faces cytoplasm, carboxyl terminus faces ER lumen
YAL064C-A	TDA8	Antisens	0.95076	No	No	NA	0.848918	Putative protein of unknown function; null mutant is sensitive to expression of the top1-T722A allele; not an essential gene
YNL036W	NCE103	Antisens	0.950748	No	No	NA	1.57121	Carbonic anhydrase; metalloenzyme that catalyzes CO2 hydration to bicarbonate, which is an important metabolic substrate, and protons; not expressed under conditions of high CO2, such as inside a growing colony, but transcription is induced in response to low CO2 levels, such as on the colony surface in ambient air; poorly transcribed under aerobic conditions and at an undetectable level under an…
YEL064C	AVT2	PCG	0.950705	No	No	0.4	0.720297	Putative transporter; member of a family of seven S. cerevisiae genes (AVT1-7) related to vesicular GABA-glycine transporters
YGL253W	HXK2	PCG	0.950667	No	No	21.48	-0.982568	Hexokinase isoenzyme 2; catalyzes phosphorylation of glucose in the cytosol; predominant hexokinase during growth on glucose; functions in the nucleus to repress expression of HXK1 and GLK1 and to induce expression of its own gene; phosphorylation/dephosphorylation at serine-14 by protein kinase Snf1p and protein phosphatase Glc7p-Reg1p regulates nucleocytoplasmic shuttling of Hxk2p; HXK2 has a p…
YMR169C	ALD3	Antisens	0.950559	No	No	NA	0.876595	Cytoplasmic aldehyde dehydrogenase; involved in beta-alanine synthesis; uses NAD+ as the preferred coenzyme; very similar to Ald2p; expression is induced by stress and repressed by glucose
YBR237W	PRP5	PCG	0.950517	No	Yes	0.6	0.914291	RNA helicase in the DEAD-box family; necessary for prespliceosome formation, bridges U1 and U2 snRNPs and enables stable U2 snRNP association with intron RNA
YLL039C	UBI4	PCG	0.950408	No	Yes	2.78	1.09298	Ubiquitin; becomes conjugated to proteins, marking them for selective degradation via the ubiquitin-26S proteasome system; essential for the cellular stress response; encoded as a polyubiquitin precursor comprised of 5 head-to-tail repeats; protein abundance increases in response to DNA replication stress
YOL087C	DUF1	Antisens	0.950399	No	No	NA	0.805033	Ubiquitin-binding protein of unknown function; contains one WD40 repeat in a beta-propeller fold; green fluorescent protein (GFP)-fusion protein localizes to the cytoplasm; homolog of human WDR48/UAF1, which is involved in regulating the Fanconi anemia pathway; deletion mutant is sensitive to various chemicals including phenanthroline, sanguinarine, and nordihydroguaiaretic acid
YNR031C	SSK2	PCG	0.950351	No	No	0.8	0.59927	MAP kinase kinase kinase of HOG1 mitogen-activated signaling pathway; interacts with Ssk1p, leading to autophosphorylation and activation of Ssk2p which phosphorylates Pbs2p; also mediates actin cytoskeleton recovery from osmotic stress; a HOG-independent function of Ssk2p mediates the calcium-sensitive phenotype of the ptp2 msg5 double disruptant; SSK2 has a paralog, SSK22, that arose from the w…
YBR295W	PCA1	PCG	0.950335	No	No	0.3	0.894092	Cadmium transporting P-type ATPase; may also have a role in copper and iron homeostasis; stabilized by Cd binding, which prevents ubiquitination; S288C and other lab strains contain a G970R mutation which eliminates Cd transport function
YJL149W	DAS1	Antisens	0.950325	No	No	NA	1.00656	Putative SCF ubiquitin ligase F-box protein; interacts physically with both Cdc53p and Skp1 and genetically with CDC34; similar to putative F-box protein YDR131C
chrVII_787924_788896	chrVII_787924_788896	Intergenic	0.950289	No	No	NA	NA	NA
YKL002W	DID4	PCG	0.950235	No	No	2.84	0.698239	Class E Vps protein of the ESCRT-III complex; required for sorting of integral membrane proteins into lumenal vesicles of multivesicular bodies, and for delivery of newly synthesized vacuolar enzymes to the vacuole, involved in endocytosis
chrXV_31745_34517	chrXV_31745_34517	Intergenic	0.950221	No	No	NA	NA	NA
YDL239C	ADY3	Antisens	0.950213	No	No	NA	0.747058	Protein required for spore wall formation; thought to mediate assembly of a Don1p-containing structure at the leading edge of the prospore membrane via interaction with spindle pole body components; potentially phosphorylated by Cdc28p; ADY3 has a paralog, CNM67, that arose from the whole genome duplication
YPR080W	TEF1	PCG	0.950062	No	No	49.7	-0.742919	Translational elongation factor EF-1 alpha; also encoded by TEF2; functions in the binding reaction of aminoacyl-tRNA (AA-tRNA) to ribosomes; may also have a role in tRNA re-export from the nucleus; TEF1 has a paralog, TEF2, that arose from the whole genome duplication
YAL019W	FUN30	Antisens	0.950046	No	No	NA	0.277967	Snf2p family member with ATP-dependent chromatin remodeling activity; has a role in silencing at the mating type locus, telomeres and centromeres; enriched at centromeres and is required for correct chromatin structure around centromeres, as well as at the boundary element of the silent HMR; recruited to DNA double-strand breaks (DSBs) where it promotes 5' strand resection of DSBs; potential Cdc2…
YDL148C	NOP14	Antisens	0.949958	No	No	NA	0.151558	Nucleolar protein; forms a complex with Noc4p that mediates maturation and nuclear export of 40S ribosomal subunits; also present in the small subunit processome complex, which is required for processing of pre-18S rRNA
YML091C	RPM2	Antisens	0.949924	No	No	NA	1.03555	Protein subunit of mitochondrial RNase P; has roles in nuclear transcription, cytoplasmic and mitochondrial RNA processing, and mitochondrial translation; distributed to mitochondria, cytoplasmic processing bodies, and the nucleus
YBR118W	TEF2	PCG	0.94972	No	No	57.3	-0.976735	Translational elongation factor EF-1 alpha; also encoded by TEF1; functions in the binding reaction of aminoacyl-tRNA (AA-tRNA) to ribosomes; may also have a role in tRNA re-export from the nucleus; TEF2 has a paralog, TEF1, that arose from the whole genome duplication
chrII_126262_126691	chrII_126262_126691	Intergenic	0.949713	No	No	NA	NA	NA
YNL323W	LEM3	PCG	0.949704	No	No	1	0.533403	Membrane protein of the plasma membrane and ER; interacts specifically in vivo with the phospholipid translocase (flippase) Dnf1p; involved in translocation of phospholipids and alkylphosphocholine drugs across the plasma membrane
YMR082C	YMR082C	PCG	0.949636	No	No	3.17	0.47316	Dubious open reading frame; unlikely to encode a functional protein, based on available experimental and comparative sequence data
YDRCdelta21	YDRCdelta21	long_terminal_repeat	0.949604	No	No	NA	NA	Ty1 LTR
YNL258C	DSL1	Antisens	0.949538	No	No	NA	0.521588	Peripheral membrane protein needed for Golgi-to-ER retrograde traffic; forms a complex with Sec39p and Tip20p that interacts with ER SNAREs Sec20p and Use1p; component of the ER target site that interacts with coatomer; interacts with Cin5p; similar to the fly and human ZW10 gene
YOR156C	NFI1	Antisens	0.949517	No	No	NA	0.641434	SUMO E3 ligase; catalyzes sumoylation of Yku70p/Yku80p and Sir4p promoting chromatin anchoring; DNA-bound form catalyzes a DNA-damaged triggered sumoylation wave resulting in multisite modification of several DNA repair proteins, enhancing interactions between these proteins and accelerating repair; promotes telomere anchoring to the nuclear envelope; involved in maintenance of proper telomere le…
YMR042W	ARG80	Antisens	0.949428	No	No	NA	0.757828	Transcription factor involved in regulating arginine-responsive genes; acts with Arg81p and Arg82p
YDR541C	YDR541C	PCG	0.949333	No	No	0.2	0.775403	Putative dihydrokaempferol 4-reductase
chrVII_569216_574233	chrVII_569216_574233	Intergenic	0.949274	No	No	NA	NA	NA
chrXIV_562506_567522	chrXIV_562506_567522	Intergenic	0.949274	No	No	NA	NA	NA
snR57	SNR57	ncRNA	0.949212	Yes	Yes	NA	2.6215	C/D box small nucleolar RNA (snoRNA); guides 2'-O-methylation of small subunit (SSU) rRNA at position G1572
YOR376W	YOR376W	PCG	0.949177	No	No	1.49	0.315052	Dubious open reading frame; unlikely to encode a functional protein, based on available experimental and comparative sequence data; YOR376W is not an essential gene
YEL005C	VAB2	Antisens	0.94908	No	No	NA	0.73939	Subunit of the BLOC-1 complex involved in endosomal maturation; interacts with Vps21p-GFP; has potential role in vacuolar function, as suggested by its ability to bind Vac8p; likely member of; Vab2p-GFP-fusion localizes to cytoplasm in punctate pattern
YBR290W	BSD2	Antisens	0.949002	No	No	NA	0.981238	Heavy metal ion homeostasis protein; facilitates trafficking of Smf1p and Smf2p metal transporters to the vacuole where they are degraded, controls metal ion transport, prevents metal hyperaccumulation, functions in copper detoxification
YDL019C	OSH2	Antisens	0.948879	No	No	NA	0.668444	Member of an oxysterol-binding protein family with seven members; in S. cerevisiae, family members have overlapping, redundant functions in sterol metabolism and collectively perform a function essential for viability; OSH2 has a paralog, SWH1, that arose from the whole genome duplication
YIL113W	SDP1	PCG	0.948831	No	No	1.21	0.910037	Stress-inducible dual-specificity MAP kinase phosphatase; negatively regulates Slt2p MAP kinase by direct dephosphorylation, diffuse localization under normal conditions shifts to punctate localization after heat shock; SDP1 has a paralog, MSG5, that arose from the whole genome duplication
YBL030C	PET9	PCG	0.948774	No	No	15.95	0.0609256	Major ADP/ATP carrier of the mitochondrial inner membrane; exchanges cytosolic ADP for mitochondrially synthesized ATP; also imports heme and ATP; phosphorylated; required for viability in many lab strains that carry a sal1 mutation; PET9 has a paralog, AAC3, that arose from the whole genome duplication
YKR023W	YKR023W	Antisens	0.94874	No	No	NA	0.938911	Putative protein of unknown function; the authentic, non-tagged protein is detected in highly purified mitochondria in high-throughput studies
YDR457W	TOM1	PCG	0.948685	No	Yes	1.47	0.393412	E3 ubiquitin ligase of the hect-domain class; has a role in mRNA export from the nucleus and may regulate transcriptional coactivators; involved in degradation of excess histones; interacts with Dia2p and is required for Dia2p degradation; required to target Cdc6p for ubiquitin-mediated destruction during G1 phase
YCR020C	PET18	PCG	0.948605	No	No	0.3	0.795273	Protein of unknown function; has weak similarity to proteins involved in thiamin metabolism; expression is induced in the absence of thiamin
YDR027C	VPS54	Antisens	0.948517	No	No	NA	0.679423	Component of the GARP (Golgi-associated retrograde protein) complex; this complex is required for the recycling of proteins from endosomes to the late Golgi; potentially phosphorylated by Cdc28p; members of the GARP complex are Vps51p-Vps52p-Vps53p-Vps54p
YHL011C	PRS3	PCG	0.948409	No	No	2.5	0.156534	5-phospho-ribosyl-1(alpha)-pyrophosphate synthetase; synthesizes PRPP, which is required for nucleotide, histidine, and tryptophan biosynthesis; one of five related enzymes, which are active as heteromultimeric complexes
YDR371W	CTS2	Antisens	0.948404	No	No	NA	0.822246	Putative chitinase; functionally complements A. gossypii cts2 mutant sporulation defect
YBR073W	RDH54	Antisens	0.948332	No	No	NA	0.717533	DNA-dependent ATPase; DNA recombination/repair translocase, supercoils DNA and promotes DNA strand opening; stimulates strand exchange by modifying the topology of double-stranded DNA; involved in recombinational repair of DNA double-strand breaks during mitosis and meiosis; contributes to the remodelling of nucleosomes; proposed to be involved in crossover interference; interacts with Dmc1p; sti…
YKLCdelta4	YKLCdelta4	long_terminal_repeat	0.948179	No	No	NA	NA	Ty1 LTR
YPL144W	POC4	PCG	0.948152	No	No	NA	1.13888	Component of a heterodimeric Poc4p-Irc25p chaperone; involved in assembly of alpha subunits into the 20S proteasome; may regulate formation of proteasome isoforms with alternative subunits under different conditions
YGL216W	KIP3	PCG	0.948148	No	No	0.6	0.740107	Kinesin-related antiparallel sliding motor protein involved in mitotic spindle positioning; sliding activity promotes bipolar spindle assembly and maintenance of genome stability; also inhibits spindle elongation and promotes spindle disassembly in late anaphase
YEL006W	YEA6	PCG	0.948012	No	No	0.91	0.484475	Putative mitochondrial NAD+ transporter; member of the mitochondrial carrier subfamily (see also YIA6); has putative human ortholog; YEA6 has a paralog, YIA6, that arose from the whole genome duplication
YOR204W	DED1	Antisens	0.947884	No	No	NA	-0.741522	ATP-dependent DEAD (Asp-Glu-Ala-Asp)-box RNA helicase; required for translation initiation of all yeast mRNAs; mutations in human DEAD-box DBY are a frequent cause of male infertility; DED1 has a paralog, DBP1, that arose from the whole genome duplication
YGL201C	MCM6	PCG	0.947846	No	No	0.4	0.500389	Protein involved in DNA replication; component of the Mcm2-7 hexameric helicase complex that binds chromatin as a part of the pre-replicative complex; forms a subcomplex with Mcm4p and Mcm7p
chrXV_128060_129097	chrXV_128060_129097	Intergenic	0.947841	No	No	NA	NA	NA
YOR208W	PTP2	PCG	0.947811	No	No	0.8	1.36722	Phosphotyrosine-specific protein phosphatase; involved in the inactivation of mitogen-activated protein kinase (MAPK) during osmolarity sensing; dephosporylates Hog1p MAPK and regulates its localization; localized to the nucleus
chrXII_19847_20998	chrXII_19847_20998	Intergenic	0.94781	No	No	NA	NA	NA
YKL173W	SNU114	PCG	0.947788	No	No	0.6	0.698337	GTPase component of U5 snRNP involved in mRNA splicing via spliceosome; binds directly to U5 snRNA; proposed to be involved in conformational changes of the spliceosome; similarity to ribosomal translocation factor EF-2
YDL086C-A	YDL086C-A	PCG	0.947722	No	No	NA	0.29878	Dubious open reading frame; unlikely to encode a functional protein, based on available experimental and comparative sequence data; overlaps uncharacterized ORF YDL086W; identified by gene-trapping, microarray expression analysis, and genome-wide homology searching
YDR498C	SEC20	PCG	0.947598	No	No	1	0.826019	Membrane glycoprotein v-SNARE; involved in retrograde transport from the Golgi to the endoplasmic reticulum (ER); required for N- and O-glycosylation in the Golgi but not in the ER; interacts with the Dsl1p complex through Tip20p
YGR166W	TRS65	PCG	0.947577	No	No	0.4	0.915992	Component of transport protein particle (TRAPP) complex II; TRAPPII is a multimeric guanine nucleotide-exchange factor for the GTPase Ypt1p, regulating intra-Golgi and endosome-Golgi traffic; role in cell wall beta-glucan biosynthesis and the stress response
chrIV_867659_868081	chrIV_867659_868081	Intergenic	0.947528	No	No	NA	NA	NA
YBR214W	SDS24	Antisens	0.947524	No	No	NA	1.03281	Protein involved in cell separation during budding; one of two S. cerevisiae homologs (Sds23p and Sds24p) of the S. pombe Sds23 protein, which is implicated in APC/cyclosome regulation; may play an indirect role in fluid-phase endocytosis; protein abundance increases in response to DNA replication stress; SDS24 has a paralog, SDS23, that arose from the whole genome duplication
YML015C	TAF11	Antisens	0.947389	No	No	NA	0.559297	TFIID subunit (40 kDa); involved in RNA polymerase II transcription initiation, similar to histone H3 with atypical histone fold motif of Spt3-like transcription factors
YCR088W	ABP1	Antisens	0.947335	No	No	NA	0.00695863	Actin-binding protein of the cortical actin cytoskeleton; important for activation of the Arp2/3 complex that plays a key role actin in cytoskeleton organization; inhibits barbed-end actin filament elongation; phosphorylation within its PRR (Proline-Rich Region), mediated by Cdc28p and Pho85p, protects Abp1p from proteolysis mediated by its own PEST sequences
YKL032C	IXR1	Antisens	0.94732	No	No	NA	0.500705	Transcriptional repressor that regulates hypoxic genes during normoxia; involved in the aerobic repression of genes such as COX5b, TIR1, and HEM13; binds DNA intrastrand cross-links formed by cisplatin; HMG (high mobility group box) domain containing protein which binds and bends cisplatin-modified DNA, blocking excision repair; IXR1 has a paralog, ABF2, that arose from the whole genome duplicati…
YPL183C	RTT10	Antisens	0.947299	No	No	NA	0.325637	WD40 domain-containing protein involved in endosomal recycling; forms a complex with Rrt2p that functions in the retromer-mediated pathway for recycling internalized cell-surface proteins; evidence it interacts with Trm7p for 2'-O-methylation of N34 of substrate tRNAs; has a role in regulation of Ty1 transposition; human ortholog is WDR6
YKR103W	NFT1	PCG	0.947286	No	No	0.1	0.789206	Putative transporter of the MRP subfamily; adjacent ORFs YKR103W and YKR104W are merged in different strain backgrounds; MRP stands for multidrug resistance-associated protein
YDR334W	SWR1	PCG	0.94724	No	Yes	0.4	0.625384	Swi2/Snf2-related ATPase; structural component of the SWR1 complex, which exchanges histone variant H2AZ (Htz1p) for chromatin-bound histone H2A; relocalizes to the cytosol in response to hypoxia
YLR066W	SPC3	Antisens	0.947189	No	No	NA	0.471288	Subunit of signal peptidase complex; complex catalyzes cleavage of N-terminal signal sequences of proteins targeted to the secretory pathway; homologous to mammalian SPC22/23; other members of the complex are Spc1p, Spc2p, and Sec11p
snR19	SNR19	ncRNA	0.947187	Yes	Yes	NA	0.167156	U1 spliceosomal RNA (U1 snRNA); snRNA U1 homolog
YNL021W	HDA1	Antisens	0.947162	No	No	NA	0.516363	Putative catalytic subunit of a class II histone deacetylase complex; role in azole resistance via Hsp90p, and in the heat shock response; Hda1p interacts with the Hda2p-Hda3p subcomplex to form an active tetramer; deletion increases histone H2B, H3 and H4 acetylation; other members of the HDA1 histone deacetylase complex are Hda2p and Hda3p
YJR040W	GEF1	PCG	0.947128	No	No	0.3	0.50653	Voltage-gated chloride channel; localized to the golgi, the endosomal system, and plasma membrane; involved in cation homeostasis; highly homologous to vertebrate voltage-gated chloride channels; modulates TBSV model (+) RNA virus replication by regulating copper metabolism
YGR237C	YGR237C	Antisens	0.947113	No	No	NA	0.862067	Putative protein of unknown function; green fluorescent protein (GFP)-fusion protein localizes to the cytoplasm
YMR113W	FOL3	PCG	0.947091	No	No	0.9	0.636601	Dihydrofolate synthetase, involved in folic acid biosynthesis; catalyzes conversion of dihydropteroate to dihydrofolate in folate coenzyme biosynthesis; FOL3 has a paralog, RMA1, that arose from the whole genome duplication
YIR018W	YAP5	Antisens	0.94703	No	No	NA	0.997604	Basic leucine zipper (bZIP) iron-sensing transcription factor; involved in diauxic shift; YAP5 has a paralog, YAP7, that arose from the whole genome duplication
YIL091C	UTP25	Antisens	0.946956	No	No	NA	0.315211	Nucleolar protein; required for 35S pre-RNA processing and 40S ribosomal subunit biogenesis
YOR296W	YOR296W	Antisens	0.946817	No	No	NA	0.723562	Putative protein of unknown function; green fluorescent protein (GFP)-fusion protein localizes to the cytoplasm; expressed during copper starvation; YOR296W is not an essential gene
YEL060C	PRB1	Antisens	0.946784	No	No	NA	1.58733	Vacuolar proteinase B (yscB); serine protease of the subtilisin family; involved in protein degradation in the vacuole and required for full protein degradation during sporulation; activity inhibited by Pbi2p; protein abundance increases in response to DNA replication stress; PRB1 has a paralog, YSP3, that arose from the whole genome duplication
YDR127W	ARO1	Antisens	0.946724	No	No	NA	-0.326997	Pentafunctional arom protein; catalyzes steps 2 through 6 in the biosynthesis of chorismate, which is a precursor to aromatic amino acids
YOL100W	PKH2	Antisens	0.946723	No	No	NA	0.782752	Serine/threonine protein kinase; involved in sphingolipid-mediated signaling pathway that controls endocytosis; activates Ypk1p and Ykr2p, components of signaling cascade required for maintenance of cell wall integrity; redundant with Pkh1p; PKH2 has a paralog, PKH1, that arose from the whole genome duplication
YNL103W	MET4	Antisens	0.946708	No	No	NA	0.766504	Leucine-zipper transcriptional activator; responsible for regulation of sulfur amino acid pathway; requires different combinations of auxiliary factors Cbf1p, Met28p, Met31p and Met32p; feedforward loop exists in the regulation of genes controlled by Met4p and Met32p; can be ubiquitinated by ubiquitin ligase SCF-Met30p, is either degraded or maintained in an inactive state; regulates degradation …
YPL036W	PMA2	Antisens	0.946704	No	No	NA	0.44708	Plasma membrane H+-ATPase; isoform of Pma1p, involved in pumping protons out of the cell; regulator of cytoplasmic pH and plasma membrane potential
YDR263C	DIN7	PCG	0.946562	No	No	0.1	0.717209	Mitochondrial nuclease functioning in DNA repair and replication; modulates the stability of the mitochondrial genome, induced by exposure to mutagens, also induced during meiosis at a time nearly coincident with commitment to recombination; DIN7 has a paralog, EXO1, that arose from the whole genome duplication
YER169W	RPH1	Antisens	0.946475	No	No	NA	0.633955	JmjC domain-containing histone demethylase; specifically demethylates H3K36 tri- and dimethyl modification states; associates with actively transcribed (RNAP II) regions in vivo and specifically targets H3K36 in its trimethylation state as its substrate; transcriptional repressor of PHR1; Rph1p phosphorylation during DNA damage is under control of the MEC1-RAD53 pathway; target of stess-induced h…
YOL076W	MDM20	PCG	0.946406	No	No	0.3	0.445736	Non-catalytic subunit of the NatB N-terminal acetyltransferase; NatB catalyzes N-acetylation of proteins with specific N-terminal sequences; involved in mitochondrial inheritance and actin assembly
YMR049C	ERB1	Antisens	0.946335	No	No	NA	-0.0145295	Constituent of 66S pre-ribosomal particles; forms a complex with Nop7p and Ytm1p that is required for maturation of the large ribosomal subunit; required for maturation of the 25S and 5.8S ribosomal RNAs; homologous to mammalian Bop1
YMR166C	YMR166C	Antisens	0.946203	No	No	NA	0.567983	Predicted transporter of the mitochondrial inner membrane; has similarity to human mitochondrial ATP-Mg/Pi carriers; YMR166C is not an essential gene
YEL055C	POL5	Antisens	0.946182	No	No	NA	-0.00889664	DNA Polymerase phi; has sequence similarity to the human MybBP1A and weak sequence similarity to B-type DNA polymerases, not required for chromosomal DNA replication; required for the synthesis of rRNA
YGRCdelta20	YGRCdelta20	Antisens	0.946148	No	No	NA	NA	Ty1 LTR
YJR141W	YJR141W	PCG	0.946135	No	No	0.7	0.582447	Essential protein of unknown function
YLL004W	ORC3	PCG	0.946001	No	No	1	0.676962	Subunit of the origin recognition complex (ORC); ORC directs DNA replication by binding to replication origins and is also involved in transcriptional silencing
YKL168C	KKQ8	PCG	0.945936	No	No	0.7	0.748893	Putative serine/threonine protein kinase with unknown cellular role; KKQ8 has a paralog, HAL5, that arose from the whole genome duplication
YJR115W	YJR115W	Antisens	0.945878	No	No	NA	-0.136393	Putative protein of unknown function; YJR115W has a paralog, ECM13, that arose from the whole genome duplication
YDR030C	RAD28	PCG	0.945861	No	No	0.3	0.85444	Protein involved in DNA repair; related to the human CSA protein that is involved in transcription-coupled repair nucleotide excision repair
YIR030C	DCG1	Antisens	0.945832	No	No	NA	0.689768	Protein of unknown function; expression is sensitive to nitrogen catabolite repression and regulated by Dal80p; contains transmembrane domain
YBR259W	YBR259W	PCG	0.945732	No	No	0.3	0.793037	Protein of unknown function; YBR259W is not an essential gene; forms cytoplasmic foci upon DNA replication stress
YPR130C	YPR130C	PCG	0.945706	No	No	0.1	0.29461	Dubious open reading frame; unlikely to encode a functional protein, based on available experimental and comparative sequence data
YOR290C	SNF2	Antisens	0.945702	No	No	NA	0.400363	Catalytic subunit of the SWI/SNF chromatin remodeling complex; involved in transcriptional regulation; contains DNA-stimulated ATPase activity; functions interdependently in transcriptional activation with Snf5p and Snf6p
YPL040C	ISM1	Antisens	0.945671	No	No	NA	0.637181	Mitochondrial isoleucyl-tRNA synthetase; null mutant is deficient in respiratory growth
YDR098C	GRX3	PCG	0.945636	No	No	1.73	0.424076	Glutathione-dependent oxidoreductase; hydroperoxide and superoxide-radical responsive; monothiol glutaredoxin subfamily member along with Grx4p and Grx5p; protects cells from oxidative damage; with Grx4p, binds to Aft1p in iron-replete conditions, promoting its dissociation from promoters; evidence exists indicating that the translation start site is not Met1 as currently annotated, but rather Me…
YPL125W	KAP120	PCG	0.945628	No	No	0.7	0.446725	Karyopherin responsible for the nuclear import of Rfp1p; Rfp1p is a ribosome maturation factor
YMR261C	TPS3	Antisens	0.945622	No	No	NA	0.469511	Regulatory subunit of trehalose-6-phosphate synthase/phosphatase; involved in synthesis of storage carbohydrate trehalose; expression is induced by stress conditions and repressed by the Ras-cAMP pathway; TPS3 has a paralog, TSL1, that arose from the whole genome duplication
YOR219C	STE13	Antisens	0.945563	No	No	NA	0.884693	Dipeptidyl aminopeptidase; Golgi integral membrane protein that cleaves on the carboxyl side of repeating -X-Ala- sequences, required for maturation of alpha factor, transcription is induced by a-factor
YKR084C	HBS1	Antisens	0.945542	No	No	NA	0.457245	GTPase with similarity to translation release factors; together with binding partner Dom34p, facilitates ribosomal subunit dissociation and peptidyl-tRNA release when translation is stalled; genetically implicated in mRNA no-go decay; HBS1 has a paralog, SKI7, that arose from the whole genome duplication
YNL246W	VPS75	PCG	0.945458	No	No	0.9	0.398003	NAP family histone chaperone; binds to histones and Rtt109p, stimulating histone acetyltransferase activity; possesses nucleosome assembly activity in vitro; proposed role in vacuolar protein sorting and in double-strand break repair; protein abundance increases in response to DNA replication stress; relocalizes to the cytosol in response to hypoxia
YOR172W	YRM1	PCG	0.945396	No	No	0.3	0.783717	Zinc finger transcription factor involved in multidrug resistance; Zn(2)-Cys(6) zinc finger transcription factor; activates genes involved in multidrug resistance; paralog of Yrr1p, acting on an overlapping set of target genes
YCL048W	SPS22	Antisens	0.94539	No	No	NA	0.755281	Protein of unknown function; SPS22 has a paralog, SPS2, that arose from the whole genome duplication; redundant with Sps2p for the organization of the beta-glucan layer of the spore wall
YJR051W	OSM1	PCG	0.945224	No	Yes	0.4	0.378133	Fumarate reductase, catalyzes the reduction of fumarate to succinate; required for the reoxidation of intracellular NADH under anaerobic conditions; mutations cause osmotic sensitivity; OSM1 has a paralog, FRD1, that arose from the whole genome duplication
chrIV_407343_408308	chrIV_407343_408308	Intergenic	0.945167	No	No	NA	NA	NA
YJL146W	IDS2	Antisens	0.945165	No	No	NA	0.759383	Protein involved in modulation of Ime2p activity during meiosis; appears to act indirectly to promote Ime2p-mediated late meiotic functions; found in growing cells and degraded during sporulation
YDR528W	HLR1	Antisens	0.945145	No	No	NA	1.03402	Protein involved in regulation of cell wall composition and integrity; also involved in cell wall response to osmotic stress; overproduction suppresses a lysis sensitive PKC mutation; similar to Lre1p, which functions antagonistically to protein kinase A; <br>HLR1 has a paralog, LRE1, that arose from the whole genome duplication
YPL094C	SEC62	Antisens	0.945141	No	No	NA	0.367267	Essential subunit of Sec63 complex; with Sec61 complex, Kar2p/BiP and Lhs1p forms a channel competent for SRP-dependent and post-translational SRP-independent protein targeting and import into the ER; other members are Sec63p, Sec62p, Sec66p and Sec72p
YIR011C	STS1	PCG	0.94511	No	No	2.14	0.612294	Protein required for localizing proteasomes to the nucleus; interacts with the karyopherin Srp1p; involved in ubiquitin-mediated protein degradation
YJL001W	PRE3	Antisens	0.945104	No	No	NA	0.387101	Beta 1 subunit of the 20S proteasome; responsible for cleavage after acidic residues in peptides
YBR288C	APM3	PCG	0.945076	No	No	1.18	0.412249	Mu3-like subunit of the clathrin associated protein complex (AP-3); functions in transport of alkaline phosphatase to the vacuole via the alternate pathway
YOR338W	YOR338W	PCG	0.945022	No	No	0.8	0.727201	Putative protein of unknown function; YOR338W transcription is regulated by Azf1p and its transcript is a specific target of the G protein effector Scp160p; identified as being required for sporulation in a high-throughput mutant screen; YOR338W has a paralog, FUN19, that arose from the whole genome duplication
YHR079C	IRE1	PCG	0.945002	No	No	0.3	0.657554	Serine-threonine kinase and endoribonuclease; transmembrane protein that mediates the unfolded protein response (UPR) by regulating Hac1p synthesis through HAC1 mRNA splicing; role in homeostatic adaptation to ER stress; Kar2p binds inactive Ire1p and releases from it upon ER stress
YIL053W	GPP1	PCG	0.944996	No	Yes	21.68	-0.708307	Constitutively expressed DL-glycerol-3-phosphate phosphatase; also known as glycerol-1-phosphatase; involved in glycerol biosynthesis, induced in response to both anaerobic and osmotic stress; GPP1 has a paralog, GPP2, that arose from the whole genome duplication
YML124C	TUB3	Antisens	0.944974	No	No	NA	NA	Alpha-tubulin; associates with beta-tubulin (Tub2p) to form tubulin dimer, which polymerizes to form microtubules; expressed at lower level than Tub1p; TUB3 has a paralog, TUB1, that arose from the whole genome duplication
YOL135C	MED7	Antisens	0.944957	No	No	NA	0.674764	Subunit of the RNA polymerase II mediator complex; associates with core polymerase subunits to form the RNA polymerase II holoenzyme; essential for transcriptional regulation
YDR246W	TRS23	PCG	0.944921	No	No	0.4	0.823502	Core component of transport protein particle (TRAPP) complexes I-III; TRAPP complexes are related multimeric guanine nucleotide-exchange factor for the GTPase Ypt1p, regulating ER-Golgi traffic (TRAPPI), intra-Golgi traffic (TRAPPII), endosome-Golgi traffic (TRAPPII and III) and autophagy (TRAPPIII); human homolog is TRAPPC4
YPL217C	BMS1	Antisens	0.944786	No	No	NA	0.188187	GTPase required for ribosomal subunit synthesis and rRNA processing; required for synthesis of 40S ribosomal subunits and for processing the 35S pre-rRNA at sites A0, A1, and A2; interacts with Rcl1p, which stimulates its GTPase and U3 snoRNA binding activities; has similarity to Tsr1p
chrXII_1058656_1059615	chrXII_1058656_1059615	Intergenic	0.94468	No	No	NA	NA	NA
YDL220C	CDC13	Antisens	0.944672	No	No	NA	0.357347	Single stranded DNA-binding protein found at TG1-3 telomere G-tails; key roles in regulation of telomerase, telomere end protection, conventional telomere replication; regulates telomere replication through recruitment of specific sub-complexes, essential function is telomere capping; forms homodimer via N-terminus; disruption of dimerization leads to short telomeres; autophagy and proteasome are…
YOR372C	NDD1	Antisens	0.94465	No	No	NA	0.653334	Transcriptional activator essential for nuclear division; localized to the nucleus; essential component of the mechanism that activates the expression of a set of late-S-phase-specific genes
YIL014W	MNT3	Antisens	0.944588	No	No	NA	0.719464	Alpha-1,3-mannosyltransferase; adds the fourth and fifth alpha-1,3-linked mannose residues to O-linked glycans during protein O-glycosylation
YKL176C	LST4	PCG	0.944584	No	No	1.1	0.765264	Protein possibly involved in a post-Golgi secretory pathway; required for the transport of nitrogen-regulated amino acid permease Gap1p from the Golgi to the cell surface
YJR151C	DAN4	Antisens	0.944583	No	No	NA	1.1632	Cell wall mannoprotein; has similarity to Tir1p, Tir2p, Tir3p, and Tir4p; expressed under anaerobic conditions, completely repressed during aerobic growth
YIL050W	PCL7	Antisens	0.94453	No	No	NA	0.506055	Pho85p cyclin of the Pho80p subfamily; forms a functional kinase complex with Pho85p which phosphorylates Mmr1p and is regulated by Pho81p; involved in glycogen metabolism, expression is cell-cycle regulated; PCL7 has a paralog, PCL6, that arose from the whole genome duplication
YJL048C	UBX6	Antisens	0.944523	No	No	NA	0.962919	UBX (ubiquitin regulatory X) domain-containing protein; interacts with Cdc48p, transcription is repressed when cells are grown in media containing inositol and choline; UBX6 has a paralog, UBX7, that arose from the whole genome duplication
YPR146C	YPR146C	Antisens	0.944368	No	No	NA	0.766104	Dubious open reading frame; unlikely to encode a functional protein, based on available experimental and comparative sequence data
YPR147C	YPR147C	Antisens	0.944368	No	No	NA	0.496706	Putative protein of unknown function; green fluorescent protein (GFP)-fusion protein localizes to the cytoplasm and is induced in response to the DNA-damaging agent MMS
YJL127C	SPT10	Antisens	0.944344	No	No	NA	0.655074	Putative histone acetylase with a role in transcriptional silencing; sequence-specific activator of histone genes, binds specifically and cooperatively to pairs of UAS elements in core histone promoters, functions at or near the TATA box
YML050W	AIM32	Antisens	0.944322	No	No	NA	0.764427	Putative protein of unknown function; null mutant is viable and displays elevated frequency of mitochondrial genome loss
YIL042C	PKP1	Antisens	0.944245	No	No	NA	0.764576	Mitochondrial protein kinase; involved in negative regulation of pyruvate dehydrogenase complex activity by phosphorylating the ser-133 residue of the Pda1p subunit; acts in concert with kinase Pkp2p and phosphatases Ptc5p and Ptc6p
YLR059C	REX2	PCG	0.944216	No	No	0.7	0.488604	3'-5' RNA exonuclease; involved in 3'-end processing of U4 and U5 snRNAs, 5S and 5.8S rRNAs, and RNase P and RNase MRP RNA; localized to mitochondria and null suppresses escape of mtDNA to nucleus in yme1 yme2 mutants; RNase D exonuclease
YIR033W	MGA2	PCG	0.944172	No	Yes	0.2	0.317652	ER membrane protein involved in regulation of OLE1 transcription; inactive ER form dimerizes and one subunit is then activated by ubiquitin/proteasome-dependent processing followed by nuclear targeting; MGA2 has a paralog, SPT23, that arose from the whole genome duplication
YPL085W	SEC16	Antisens	0.944146	No	No	NA	0.200726	COPII vesicle coat protein required for ER transport vesicle budding; essential factor in endoplasmic reticulum exit site (ERES) formation, as well as in COPII-mediated ER-to-Golgi traffic; bound to periphery of ER membranes and may act to stabilize initial COPII complexes; interacts with Sec23p, Sec24p and Sec31p
YNL305C	BXI1	Antisens	0.944082	No	No	NA	0.952653	Protein involved in apoptosis; variously described as containing a BCL-2 homology (BH3) domain or as a member of the BAX inhibitor family; reported to promote apoptosis under some conditions and to inhibit it in others; localizes to ER and vacuole; may link the unfolded protein response to apoptosis via regulation of calcium-mediated signaling; translocates to mitochondria under apoptosis-inducin…
YLL013C	PUF3	Antisens	0.944061	No	No	NA	0.153929	Protein of the mitochondrial outer surface; links the Arp2/3 complex with the mitochore during anterograde mitochondrial movement; also binds to and promotes degradation of mRNAs for select nuclear-encoded mitochondrial proteins
YLR106C	MDN1	PCG	0.94406	No	Yes	1.23	0.285901	Huge dynein-related AAA-type ATPase (midasin); forms extended pre-60S particle with the Rix1 complex (Rix1p-Ipi1p-Ipi3p); acts in removal of ribosomal biogenesis factors at successive steps of pre-60S assembly and export from nucleus
YIL073C	SPO22	PCG	0.944024	No	No	0.1	0.632062	Meiosis-specific protein essential for chromosome synapsis; involved in completion of nuclear divisions during meiosis; induced early in meiosis
YER184C	YER184C	Antisens	0.944008	No	No	NA	1.0277	Putative zinc cluster protein; deletion confers sensitivity to Calcufluor white, and prevents growth on glycerol or lactate as sole carbon source
YER033C	ZRG8	PCG	0.943986	No	Yes	1.21	0.899649	Protein of unknown function; authentic, non-tagged protein is detected in highly purified mitochondria in high-throughput studies; GFP-fusion protein is localized to the cytoplasm; transcription induced under conditions of zinc deficiency
YER131W	RPS26B	Antisens	0.943965	No	No	NA	-0.603749	Protein component of the small (40S) ribosomal subunit; homologous to mammalian ribosomal protein S26, no bacterial homolog; RPS26B has a paralog, RPS26A, that arose from the whole genome duplication
YAL063C-A	YAL063C-A	PCG	0.94394	No	No	NA	0.548606	Putative protein of unknown function; identified by expression profiling and mass spectrometry
YLR412W	BER1	Antisens	0.943809	No	No	NA	0.512043	Protein involved in microtubule-related processes; GFP-fusion protein localizes to the cytoplasm and is induced in response to the DNA-damaging agent MMS; YLR412W is not an essential gene; similar to Arabidopsis SRR1 gene
YLR226W	BUR2	PCG	0.943781	No	No	0.91	0.6316	Cyclin for the Sgv1p (Bur1p) protein kinase; Sgv1p and Bur2p comprise a CDK-cyclin complex involved in transcriptional regulation through its phosphorylation of the carboxy-terminal domain of the largest subunit of RNA polymerase II
YER069W	ARG5,6	Antisens	0.94369	No	No	NA	0.701553	Acetylglutamate kinase and N-acetyl-gamma-glutamyl-phosphate reductase; N-acetyl-L-glutamate kinase (NAGK) catalyzes the 2nd and N-acetyl-gamma-glutamyl-phosphate reductase (NAGSA), the 3rd step in arginine biosynthesis; synthesized as a precursor which is processed in the mitochondrion to yield mature NAGK and NAGSA; enzymes form a metabolon complex with Arg2p; NAGK C-terminal domain stabilizes …
YDL133W	SRF1	PCG	0.943657	No	No	1.24	0.783533	Regulator of phospholipase D (Spo14p); interacts with Spo14p and regulates its catalytic activity; capable of buffering the toxicity of C16:0 platelet activating factor, a lipid that accumulates intraneuronally in Alzheimer's patients
YIL159W	BNR1	Antisens	0.943576	No	No	NA	0.715756	Formin; nucleates the formation of linear actin filaments, involved in cell processes such as budding and mitotic spindle orientation which require the formation of polarized actin cables, functionally redundant with BNI1
YLR097C	HRT3	Antisens	0.943566	No	No	NA	0.834599	Putative SCF-ubiquitin ligase F-box protein; based on both genetic and physical interactions and sequence similarity; identified in association with Cdc53p, Skp1p and Ubi4 in large and small-scale studies
YGR221C	TOS2	Antisens	0.94355	No	No	NA	1.12184	Protein involved in localization of Cdc24p to the site of bud growth; may act as a membrane anchor; localizes to the bud neck and bud tip; potentially phosphorylated by Cdc28p; TOS2 has a paralog, SKG6, that arose from the whole genome duplication
YFR033C	QCR6	PCG	0.94352	No	No	6.11	1.04978	Subunit 6 of the ubiquinol cytochrome-c reductase complex; the complex, also known as the cytochrome bc(1) complex or Complex III, is a component of the mitochondrial inner membrane electron transport chain; highly acidic protein; required for maturation of cytochrome c1; may be loosely associated with the complex since it is easily released into the intermembrane space
YPR143W	RRP15	Antisens	0.94338	No	No	NA	0.588106	Nucleolar protein; constituent of pre-60S ribosomal particles; required for proper processing of the 27S pre-rRNA at the A3 and B1 sites to yield mature 5.8S and 25S rRNAs
YOR038C	HIR2	PCG	0.943307	No	No	0.4	0.572668	Subunit of HIR nucleosome assembly complex; involved in regulation of histone gene transcription; recruits Swi-Snf complexes to histone gene promoters; promotes heterochromatic gene silencing with Asf1p; relocalizes to the cytosol in response to hypoxia
YOL163W	YOL163W	PCG	0.943262	No	No	1.37	0.792462	Putative protein of unknown function; member of the Dal5p subfamily of the major facilitator family
YIR006C	PAN1	PCG	0.943258	No	Yes	1.58	0.365476	Part of actin cytoskeleton-regulatory complex Pan1p-Sla1p-End3p; associates with actin patches on cell cortex; promotes protein-protein interactions essential for endocytosis; binds to and activates Arp2/3 complex in vitro; phosphorylation of Thr-1225 is regulated by MAPK Hog1p in response to osmotic stress; previously thought to be a subunit of poly(A) ribonuclease
YDR416W	SYF1	PCG	0.943238	No	No	0.4	0.658048	Member of the NineTeen Complex (NTC); that contains Prp19p and stabilizes U6 snRNA in catalytic forms of the spliceosome containing U2, U5, and U6 snRNAs; null mutant has splicing defect and arrests in G2/M; relocalizes to the cytosol in response to hypoxia; homologs in human and C. elegans
YBL082C	ALG3	PCG	0.943221	No	No	0.6	0.378099	Dolichol-P-Man dependent alpha(1-3) mannosyltransferase; involved in the synthesis of dolichol-linked oligosaccharide donor for N-linked glycosylation of proteins
YDR195W	REF2	Antisens	0.943201	No	No	NA	0.567571	RNA-binding protein; involved in the cleavage step of mRNA 3'-end formation prior to polyadenylation, and in snoRNA maturation; part of holo-CPF subcomplex APT, which associates with 3'-ends of snoRNA- and mRNA-encoding genes; relocalizes to the cytosol in response to hypoxia
YPR184W	GDB1	Antisens	0.943121	No	No	NA	0.933297	Glycogen debranching enzyme; contains glucanotranferase and alpha-1,6-amyloglucosidase activities; required for glycogen degradation; phosphorylated in mitochondria; activity is inhibited by Igd1p; protein abundance increases in response to DNA replication stress
YLR352W	YLR352W	Antisens	0.94306	No	No	NA	0.7425	Putative protein of unknown function with similarity to F-box proteins; interacts with Skp1p and Cdc53p; YLR352W is not an essential gene
YHR165C	PRP8	PCG	0.94299	No	Yes	1.23	0.527146	Component of U4/U6-U5 snRNP complex; involved in second catalytic step of splicing; participates in spliceosomal assembly through its interaction with U1 snRNA; mutations of human Prp8 cause retinitis pigmentosa
YPL226W	NEW1	Antisens	0.942983	No	No	NA	-0.262869	ATP binding cassette protein; cosediments with polysomes and is required for biogenesis of the small ribosomal subunit; Asn/Gln-rich rich region supports [NU+] prion formation and susceptibility to [PSI+] prion induction
YCR011C	ADP1	Antisens	0.942971	No	No	NA	0.767521	Putative ATP-dependent permease of the ABC transporter family
YPR117W	YPR117W	PCG	0.942968	No	Yes	0.3	0.998543	Putative protein of unknown function
YJL059W	YHC3	PCG	0.942961	No	No	1.31	0.681776	Protein required for the ATP-dependent transport of arginine; vacuolar membrane protein; involved in the ATP-dependent transport of arginine into the vacuole and possibly in balancing ion homeostasis; homolog of human CLN3 involved in Batten disease (juvenile onset neuronal ceroid lipofuscinosis)
YPR121W	THI22	Antisens	0.942951	No	No	NA	0.878591	Protein with similarity to hydroxymethylpyrimidine phosphate kinases; member of a gene family with THI20 and THI21; not required for thiamine biosynthesis
YFL036W	RPO41	PCG	0.942944	No	Yes	0.8	0.341768	Mitochondrial RNA polymerase; single subunit enzyme similar to those of T3 and T7 bacteriophages; requires a specificity subunit encoded by MTF1 for promoter recognition; Mtf1p interacts with and stabilizes the Rpo41p-promoter complex, enhancing DNA bending and melting to facilitate pre-initiation open complex formation
YIL169C	YIL169C	Antisens	0.942818	No	No	NA	0.184309	Putative protein of unknown function; serine/threonine rich and highly similar to YOL155C, a putative glucan alpha-1,4-glucosidase; transcript is induced in both high and low pH environments; YIL169C is a non-essential gene
YOL155C	HPF1	Antisens	0.942818	No	No	NA	0.363019	Haze-protective mannoprotein; reduces the particle size of aggregated proteins in white wines
YGL062W	PYC1	PCG	0.942816	No	No	1.39	0.537756	Pyruvate carboxylase isoform; cytoplasmic enzyme that converts pyruvate to oxaloacetate; differentially regulated than isoform Pyc2p; mutations in the human homolog are associated with lactic acidosis; PYC1 has a paralog, PYC2, that arose from the whole genome duplication
YHR037W	PUT2	PCG	0.942814	No	No	1.65	0.931948	Delta-1-pyrroline-5-carboxylate dehydrogenase; nuclear-encoded mitochondrial protein involved in utilization of proline as sole nitrogen source; deficiency of the human homolog causes HPII, an autosomal recessive inborn error of metabolism
YKL182W	FAS1	PCG	0.942805	No	Yes	7.52	-0.586712	Beta subunit of fatty acid synthetase; complex catalyzes the synthesis of long-chain saturated fatty acids; contains acetyltransacylase, dehydratase, enoyl reductase, malonyl transacylase, and palmitoyl transacylase activities
YKL120W	OAC1	Antisens	0.942771	No	No	NA	0.0586982	Mitochondrial inner membrane transporter; transports oxaloacetate, sulfate, thiosulfate, and isopropylmalate; member of the mitochondrial carrier family
YBL060W	YEL1	PCG	0.942764	No	No	0.2	0.778196	Guanine nucleotide exchange factor specific for Arf3p; localized to the bud neck and tip; required for localization of Arf3p to the bud neck and tip
YGR271C-A	EFG1	Antisens	0.942637	No	No	NA	0.110203	Essential protein required for maturation of 18S rRNA; null mutant is sensitive to hydroxyurea and is delayed in recovering from alpha-factor arrest; green fluorescent protein (GFP)-fusion protein localizes to the nucleolus
YGR272C	YGR272C	Antisens	0.942637	No	No	NA	0.226239	NA
YKR008W	RSC4	PCG	0.942588	No	No	0.6	0.501156	Component of the RSC chromatin remodeling complex; found in close proximity to nucleosomal DNA; displaced from the surface of nucleosomal DNA after chromatin remodeling; acetylated (K25) by Gcn5p, altering replication stress tolerance; contains tandem bromodomains that recognize histone H3 acetylated on K14 (H3K14ac) by Gcn5p
YJR074W	MOG1	PCG	0.942583	No	No	0.8	0.547373	Conserved nuclear protein that interacts with GTP-Gsp1p; stimulates nucleotide release from Gsp1p; involved in nuclear protein import; nucleotide release is inhibited by Yrb1p
chrXV_520113_521214	chrXV_520113_521214	Intergenic	0.942565	No	No	NA	NA	NA
YNL322C	KRE1	PCG	0.942557	No	Yes	5.6	0.598966	Cell wall glycoprotein involved in beta-glucan assembly; serves as a K1 killer toxin membrane receptor
YGR101W	PCP1	PCG	0.942515	No	No	1.2	0.483937	Mitochondrial serine protease; required for the processing of various mitochondrial proteins and maintenance of mitochondrial DNA and morphology; belongs to the rhomboid-GlpG superfamily of intramembrane peptidases
YHR172W	SPC97	Antisens	0.942488	No	No	NA	0.671907	Component of the microtubule-nucleating Tub4p (gamma-tubulin) complex; interacts with Spc110p at the spindle pole body (SPB) inner plaque and with Spc72p at the SPB outer plaque
YLR307C-A	YLR307C-A	PCG	0.942485	No	No	NA	0.746918	Putative protein of unknown function
YBR200W-A	YBR200W-A	Antisens	0.942465	No	No	NA	0.923438	Putative protein of unknown function; identified by fungal homology and RT-PCR
YAR050W	FLO1	PCG	0.942441	No	No	0.2	0.940771	Lectin-like protein involved in flocculation; cell wall protein that binds mannose chains on the surface of other cells, confers floc-forming ability that is chymotrypsin sensitive and heat resistant; FLO1 has a paralog, FLO5, that arose from a segmental duplication
YBR281C	DUG2	Antisens	0.942412	No	No	NA	0.466381	Component of glutamine amidotransferase (GATase II); forms a complex with Dug3p to degrade glutathione (GSH) and other peptides containing a gamma-glu-X bond in an alternative pathway to GSH degradation by gamma-glutamyl transpeptidase (Ecm38p)
YLR253W	MCP2	Antisens	0.942321	No	No	NA	0.564027	Mitochondrial protein of unknown function involved in lipid homeostasis; integral membrane protein that localizes to the mitochondrial inner membrane; involved in mitochondrial morphology; non-essential gene which interacts genetically with MDM10, and other members of the ERMES complex; transcription is periodic during the metabolic cycle; homologous to human aarF domain containing kinase, ADCK1
YPL231W	FAS2	Antisens	0.942292	No	No	NA	-0.719061	Alpha subunit of fatty acid synthetase; complex catalyzes the synthesis of long-chain saturated fatty acids; contains the acyl-carrier protein domain and beta-ketoacyl reductase, beta-ketoacyl synthase and self-pantetheinylation activities
YOL159C	YOL159C	PCG	0.942244	No	No	0.4	0.745829	Soluble protein of unknown function; deletion mutants are viable and have elevated levels of Ty1 retrotransposition and Ty1 cDNA
YKR066C	CCP1	Antisens	0.942134	No	No	NA	0.810977	Mitochondrial cytochrome-c peroxidase; degrades reactive oxygen species in mitochondria, involved in the response to oxidative stress
YJR015W	YJR015W	PCG	0.942132	No	No	2.84	0.107063	Putative protein of unknown function; localizes to endoplasmic reticulum and cytoplasm; predicted to encode a membrane transporter based on phylogenetic analysis; not an essential gene; YJR015W has a paralog, SNG1, that arose from the whole genome duplication
YNR014W	YNR014W	PCG	0.942071	No	No	0.4	0.738215	Putative protein of unknown function; expression is cell-cycle regulated, Azf1p-dependent, and heat-inducible; YNR014W has a paralog, YMR206W, that arose from the whole genome duplication
YOR341W	RPA190	PCG	0.942069	No	No	1.74	-0.186646	RNA polymerase I largest subunit A190
YDL209C	CWC2	PCG	0.942024	No	No	0.4	0.572057	Member of the NineTeen Complex (NTC); this complex contains Prp19p and stabilizes U6 snRNA in catalytic forms of the spliceosome containing U2, U5, and U6 snRNAs; binds directly to U6 snRNA; similar to S. pombe Cwf2
YBR150C	TBS1	Antisens	0.942017	No	No	NA	0.801429	Putative protein of unknown function; the authentic, non-tagged protein is detected in highly purified mitochondria in high-throughput studies; TBS1 has a paralog, HAL9, that arose from the whole genome duplication
YHRCdelta3	YHRCdelta3	long_terminal_repeat	0.942016	No	No	NA	NA	Ty1 LTR
tT(AGU)H	tT(AGU)H	ncRNA	0.942016	No	No	NA	NA	Threonine tRNA (tRNA-Thr), predicted by tRNAscan-SE analysis
YBR012W-A	YBR012W-A	Antisens	0.941991	No	No	NA	-0.699911	Retrotransposon TYA Gag gene co-transcribed with TYB Pol; translated as TYA or TYA-TYB polyprotein; Gag is a nucleocapsid protein that is the structural constituent of virus-like particles (VLPs); similar to retroviral Gag
YMR293C	HER2	PCG	0.941746	No	No	0.6	0.776345	Subunit of the trimeric GatFAB AmidoTransferase(AdT) complex; involved in the formation of Q-tRNAQ; required for remodeling of ER caused by Hmg2p overexpression; similar to bacterial GatA glutamyl-tRNA amidotransferase
YPL214C	THI6	Antisens	0.941721	No	No	NA	0.96557	Thiamine-phosphate diphosphorylase and hydroxyethylthiazole kinase; required for thiamine biosynthesis; GFP-fusion protein localizes to the cytoplasm in a punctate pattern
YHR006W	STP2	Antisens	0.941704	No	No	NA	1.04231	Transcription factor; activated by proteolytic processing in response to signals from the SPS sensor system for external amino acids; activates transcription of amino acid permease genes; STP2 has a paralog, STP1, that arose from the whole genome duplication
YCL050C	APA1	PCG	0.941632	No	No	3.98	-0.159116	AP4A phosphorylase; bifunctional diadenosine 5',5'''-P1,P4-tetraphosphate phosphorylase and ADP sulfurylase involved in catabolism of bis(5'-nucleosidyl) tetraphosphates; catalyzes phosphorolysis of dinucleoside oligophosphates, cleaving substrates' alpha/beta-anhydride bond and introducing Pi into the beta-position of the corresponding NDP formed; protein abundance increases under DNA replicatio…
YIL107C	PFK26	Antisens	0.941582	No	No	NA	0.976207	6-phosphofructo-2-kinase; inhibited by phosphoenolpyruvate and sn-glycerol 3-phosphate; has negligible fructose-2,6-bisphosphatase activity; transcriptional regulation involves protein kinase A
YBR108W	AIM3	PCG	0.941534	No	No	1.35	0.916999	Protein that inhibits barbed-end actin filament elongation; interacts with Rvs167p; null mutant is viable and displays elevated frequency of mitochondrial genome loss
YKR047W	YKR047W	PCG	0.941527	No	No	0.4	-0.0194932	Dubious open reading frame; unlikely to encode a functional protein, based on available experimental and comparative sequence data; partially overlaps the verified gene NAP1
YGL198W	YIP4	PCG	0.941517	No	No	2.45	0.402011	Protein that interacts with Rab GTPases; localized to late Golgi vesicles; computational analysis of large-scale protein-protein interaction data suggests a possible role in vesicle-mediated transport
YMR047C	NUP116	Antisens	0.941373	No	No	NA	0.361745	FG-nucleoporin component of central core of the nuclear pore complex; contributes directly to nucleocytoplasmic transport and maintenance of the nuclear pore complex (NPC) permeability barrier; forms a stable association with Nup82p, Gle2p and two other FG-nucleoporins (Nsp1p and Nup159p); NUP116 has a paralog, NUP100, that arose from the whole genome duplication
YFR010W	UBP6	Antisens	0.941257	No	No	NA	0.594268	Ubiquitin-specific protease; situated in the base subcomplex of the 26S proteasome, releases free ubiquitin from branched polyubiquitin chains; negatively regulates degradation of ubiquitinated proteins by the proteasome; works in opposition to Hul5p polyubiquitin elongation activity; mutant has aneuploidy tolerance
YLR268W	SEC22	Antisens	0.941246	No	No	NA	0.546494	R-SNARE protein; assembles into SNARE complex with Bet1p, Bos1p and Sed5p; cycles between the ER and Golgi complex; involved in anterograde and retrograde transport between the ER and Golgi; synaptobrevin homolog
YNL244C	SUI1	PCG	0.941149	No	No	12.5	-0.433165	Translation initiation factor eIF1; component of a complex involved in recognition of the initiator codon; modulates translation accuracy at the initiation phase
YDR109C	YDR109C	PCG	0.941128	No	No	0.3	0.77275	Putative kinase
YJL078C	PRY3	Antisens	0.941066	No	No	NA	0.252466	Cell wall-associated protein involved in export of acetylated sterols; member of the CAP protein superfamily (cysteine-rich secretory proteins (CRISP), antigen 5, and pathogenesis related 1 proteins); role in mating efficiency; expression of full-length transcript is daughter cell-specific; in response to alpha factor, a short transcript starting at +452 is expressed and the long form is represse…
YLR351C	NIT3	PCG	0.941063	No	No	2	0.33262	Nit protein; one of two proteins in S. cerevisiae with similarity to the Nit domain of NitFhit from fly and worm and to the mouse and human Nit protein which interacts with the Fhit tumor suppressor; nitrilase superfamily member
YPR126C	YPR126C	PCG	0.94105	No	No	0.3	0.400832	Dubious open reading frame; unlikely to encode a functional protein, based on available experimental and comparative sequence data
snR79	SNR79	ncRNA	0.941031	Yes	Yes	NA	2.22796	C/D box small nucleolar RNA (snoRNA); guides 2'-O-methylation of small subunit (SSU) rRNA at position C1007
YPL190C	NAB3	Antisens	0.941021	No	No	NA	0.569618	RNA-binding protein, subunit of Nrd1 complex (Nrd1p-Nab3p-Sen1p); complex interacts with exosome to mediate 3'-end formation of some mRNAs, snRNAs, snoRNAs, and CUTs; required for termination of non-poly(A) transcripts and efficient splicing; Nrd1-Nab3 pathway appears to have a role in rapid suppression of some genes when cells are shifted to poor growth conditions, indicating role for Nrd1-Nab3 …
YOR014W	RTS1	Antisens	0.940906	No	No	NA	0.471031	B-type regulatory subunit of protein phosphatase 2A (PP2A); Rts1p and Cdc55p are alternative regulatory subunits for PP2A catalytic subunits, Pph21p and Pph22p; PP2A-Rts1p protects cohesin when recruited by Sgo1p to the pericentromere; highly enriched at centromeres in the absence of Cdc55p; required for maintenance of septin ring organization during cytokinesis, for ring disassembly in G1 and fo…
YOR301W	RAX1	PCG	0.940898	No	No	0.6	0.511671	Protein involved in bud site selection during bipolar budding; localization requires Rax2p; has similarity to members of the insulin-related peptide superfamily
YDL059C	RAD59	PCG	0.940866	No	No	0.3	0.718542	Protein involved DNA double-strand break repair; repairs breaks in DNA during vegetative growth via recombination and single-strand annealing; anneals complementary single-stranded DNA; forms nuclear foci upon DNA replication stress; required for loading of Rad52p to DSBs; paralog of Rad52p
YDR350C	ATP22	PCG	0.940839	No	No	0.6	0.884685	Specific translational activator for the mitochondrial ATP6 mRNA; Atp6p encodes a subunit of F1F0 ATP synthase; localized to the mitochondrial inner membrane
chrXVI_619151_620282	chrXVI_619151_620282	Intergenic	0.940811	No	No	NA	NA	NA
YNL006W	LST8	Antisens	0.940793	No	No	NA	0.725899	Protein required for the transport of Gap1p; required for the transport of amino acid permease Gap1p from the Golgi to the cell surface; component of the TOR signaling pathway; associates with both Tor1p and Tor2p; contains a WD-repeat
YML063W	RPS1B	Antisens	0.940737	No	No	NA	-0.829855	Ribosomal protein 10 (rp10) of the small (40S) subunit; homologous to mammalian ribosomal protein S3A, no bacterial homolog; RPS1B has a paralog, RPS1A, that arose from the whole genome duplication
chrV_402005_402231	chrV_402005_402231	Intergenic	0.940709	No	No	NA	NA	NA
YPR070W	MED1	Antisens	0.940655	No	No	NA	0.707103	Subunit of the RNA polymerase II mediator complex; associates with core polymerase subunits to form the RNA polymerase II holoenzyme; essential for transcriptional regulation
YBR138C	YBR138C	Antisens	0.940646	No	No	NA	0.722379	Cytoplasmic protein of unknown function; potentially phosphorylated by Cdc28p; YBR138C is not an essential gene
YDR240C	SNU56	Antisens	0.940626	No	No	NA	0.667214	Component of U1 snRNP required for mRNA splicing via spliceosome; yeast specific, no metazoan counterpart; interacts with mRNA in commitment complex
YER055C	HIS1	PCG	0.940611	No	No	10.4	-0.505192	ATP phosphoribosyltransferase; a hexameric enzyme, catalyzes the first step in histidine biosynthesis; mutations cause histidine auxotrophy and sensitivity to Cu, Co, and Ni salts; transcription is regulated by general amino acid control
YGL202W	ARO8	Antisens	0.940577	No	No	NA	-0.137346	Aromatic aminotransferase I; expression is regulated by general control of amino acid biosynthesis
YMR280C	CAT8	Antisens	0.940571	No	No	NA	0.822861	Zinc cluster transcriptional activator; necessary for derepression of a variety of genes under non-fermentative growth conditions, active after diauxic shift, binds carbon source responsive elements; relative distribution to the nucleus increases upon DNA replication stress
YLR441C	RPS1A	Antisens	0.940452	No	No	NA	-0.58169	Ribosomal protein 10 (rp10) of the small (40S) subunit; homologous to mammalian ribosomal protein S3A, no bacterial homolog; RPS1A has a paralog, RPS1B, that arose from the whole genome duplication
YDR266C	HEL2	PCG	0.940425	No	No	0.91	0.436219	RING finger ubiquitin ligase (E3); involved in ubiquitylation and degradation of excess histones; interacts with Ubc4p and Rad53p; null mutant sensitive to hydroxyurea (HU); green fluorescent protein (GFP)-fusion protein localizes to the cytoplasm; computational analysis suggests a role as a transcription factor
YNL039W	BDP1	Antisens	0.94042	No	No	NA	0.679086	Essential subunit of RNA polymerase III transcription factor (TFIIIB); TFIIIB is involved in transcription of genes encoding tRNAs, 5S rRNA, U6 snRNA, and other small RNAs
YIR023W	DAL81	Antisens	0.940405	No	No	NA	0.621905	Positive regulator of genes in multiple nitrogen degradation pathways; contains DNA binding domain but does not appear to bind the dodecanucleotide sequence present in the promoter region of many genes involved in allantoin catabolism
YPL031C	PHO85	PCG	0.940314	No	No	1.2	0.526445	Cyclin-dependent kinase; has ten cyclin partners; involved in regulating the cellular response to nutrient levels and environmental conditions and progression through the cell cycle
YOR032C	HMS1	PCG	0.940296	No	No	1.49	0.931565	bHLH protein with similarity to myc-family transcription factors; overexpression confers hyperfilamentous growth and suppresses the pseudohyphal filamentation defect of a diploid mep1 mep2 homozygous null mutant
YOL132W	GAS4	PCG	0.940159	No	No	1.49	0.849381	1,3-beta-glucanosyltransferase; involved with Gas2p in spore wall assembly; has similarity to Gas1p; localizes to the cell wall
YNL274C	GOR1	Antisens	0.940142	No	No	NA	1.05258	Glyoxylate reductase; null mutation results in increased biomass after diauxic shift; the authentic, non-tagged protein is detected in highly purified mitochondria in high-throughput studies; protein abundance increases in response to DNA replication stress
YDR380W	ARO10	PCG	0.940132	No	No	0.2	1.59031	Phenylpyruvate decarboxylase; catalyzes decarboxylation of phenylpyruvate to phenylacetaldehyde, which is the first specific step in the Ehrlich pathway; involved in protein N-terminal Met and Ala catabolism
YER114C	BOI2	Antisens	0.940009	No	No	NA	0.469583	Protein implicated in polar growth, functionally redundant with Boi1p; interacts with bud-emergence protein Bem1p; contains an SH3 (src homology 3) domain and a PH (pleckstrin homology) domain; BOI2 has a paralog, BOI1, that arose from the whole genome duplication
YNL268W	LYP1	PCG	0.940003	No	No	5.4	0.0261228	Lysine permease; one of three amino acid permeases (Alp1p, Can1p, Lyp1p) responsible for uptake of cationic amino acids
YPR081C	GRS2	PCG	0.939946	No	No	0.4	0.697092	Glycine-tRNA synthetase, not expressed under normal growth conditions; expression is induced under heat, oxidative, pH, or ethanol stress conditions; more stable than the major glycine-tRNA synthetase Grs1p at 37 deg C; GRS2 has a paralog, GRS1, that arose from the whole genome duplication
YPR082C	DIB1	PCG	0.939946	No	No	1.76	0.67036	17-kDa component of the U4/U6aU5 tri-snRNP; plays an essential role in pre-mRNA splicing, orthologue of hDIM1, the human U5-specific 15-kDa protein
YOR353C	SOG2	Antisens	0.93985	No	No	NA	0.755119	Key component of the RAM signaling network; required for proper cell morphogenesis and cell separation after mitosis
YJR077C	MIR1	Antisens	0.93979	No	No	NA	0.595058	Mitochondrial phosphate carrier; imports inorganic phosphate into mitochondria; functionally redundant with Pic2p but more abundant than Pic2p under normal conditions; phosphorylated
YIR009W	MSL1	PCG	0.939747	No	No	0.2	0.992805	U2B component of U2 snRNP; involved in splicing, binds the U2 snRNA stem-loop IV in vitro but requires association of Lea1p for in vivo binding; does not contain the conserved C-terminal RNA binding domain found in other family members
YMR191W	SPG5	Antisens	0.939649	No	No	NA	0.910761	Protein required for proteasome assembly during quiescence; binds to base of the proteasome regulartory particle; required for survival at high temperature during stationary phase; not required for growth on nonfermentable carbon sources
snR17a	SNR17A	Antisens	0.939647	No	No	NA	-0.868979	Small nucleolar RNA (snoRNA) U3; part of Small ribosomal SubUnit (SSU) processosome; SNR17B also encodes snoRNA U3
snR17b	SNR17B	Antisens	0.939647	No	No	NA	-0.181667	Small nucleolar RNA (snoRNA) U3; part of small (ribosomal) subunit (SSU) processosome; SNR17A also encodes snoRNA U3
YOR235W	YOR235W	Antisens	0.939647	No	No	NA	0.335264	Dubious open reading frame; unlikely to encode a functional protein, based on available experimental and comparative sequence data; null mutant displays increased levels of spontaneous Rad52 foci
YDR216W	ADR1	Antisens	0.939606	No	No	NA	0.939127	Carbon source-responsive zinc-finger transcription factor; required for transcription of the glucose-repressed gene ADH2, of peroxisomal protein genes, and of genes required for ethanol, glycerol, and fatty acid utilization
YGL013C	PDR1	PCG	0.939471	No	No	1.24	0.621211	Transcription factor that regulates the pleiotropic drug response; zinc cluster protein that is a master regulator involved in recruiting other zinc cluster proteins to pleiotropic drug response elements (PDREs) to fine tune the regulation of multidrug resistance genes; relocalizes to the cytosol in response to hypoxia; PDR1 has a paralog, PDR3, that arose from the whole genome duplication
YOR040W	GLO4	PCG	0.939461	No	No	0.3	0.670372	Mitochondrial glyoxalase II; catalyzes the hydrolysis of S-D-lactoylglutathione into glutathione and D-lactate; GLO4 has a paralog, GLO2, that arose from the whole genome duplication
chrIX_26246_28892	chrIX_26246_28892	Intergenic	0.939444	No	No	NA	NA	NA
YJL076W	NET1	PCG	0.939431	No	No	0.4	0.202159	Core subunit of the RENT complex; involved in nucleolar silencing and telophase exit; stimulates transcription by RNA polymerase I and regulates nucleolar structure; NET1 has a paralog, TOF2, that arose from the whole genome duplication
YLR030W	YLR030W	Antisens	0.939297	No	No	NA	0.930218	Putative protein of unknown function; S288C contains an in-frame stop codon between ORFs YLR030W and YLR031W
YLR031W	YLR031W	Antisens	0.939297	No	No	NA	0.856782	Putative protein of unknown function; S288C contains an in-frame stop codon between ORFs YLR030W and YLR031W; YLR031W has a paralog, YMR124W, that arose from the whole genome duplication
YCR077C	PAT1	Antisens	0.939277	No	No	NA	0.253998	Deadenylation-dependent mRNA-decapping factor; also required for faithful chromosome transmission, maintenance of rDNA locus stability, and protection of mRNA 3'-UTRs from trimming; associated with topoisomerase II; functionally linked to Pab1p; forms cytoplasmic foci upon DNA replication stress; phosphorylation by PKA inhibits P body foci formation
YOL154W	ZPS1	Antisens	0.93914	No	No	NA	0.885035	Putative GPI-anchored protein; transcription is induced under low-zinc conditions, as mediated by the Zap1p transcription factor, and at alkaline pH
YOR315W	SFG1	Antisens	0.939101	No	No	NA	0.385875	Nuclear protein putative transcription factor; required for growth of superficial pseudohyphae (which do not invade the agar substrate) but not for invasive pseudohyphal growth; may act together with Phd1p; potential Cdc28p substrate
chrXV_618429_619701	chrXV_618429_619701	Intergenic	0.939047	No	No	NA	NA	NA
YGL204C	YGL204C	PCG	0.93903	No	No	0.6	0.815068	Protein of unknown function; mRNA identified as translated by ribosome profiling data
YER170W	ADK2	Antisens	0.939005	No	No	NA	0.652438	Mitochondrial adenylate kinase; catalyzes the reversible synthesis of GTP and AMP from GDP and ADP; may serve as a back-up for synthesizing GTP or ADP depending on metabolic conditions; 3' sequence of ADK2 varies with strain background
YJL061W	NUP82	Antisens	0.938988	No	No	NA	0.494627	Linker nucleoporin component of the nuclear pore complex (NPC); also part of the NPC cytoplasmic filaments; contributes to nucleocytoplasmic transport and NPC biogenesis; forms stable associations with three FG-nucleoporins (Nsp1p, Nup159p, and Nup116p); relocalizes to the cytosol in response to hypoxia
YML005W	TRM12	Antisens	0.938945	No	No	NA	0.663041	S-adenosylmethionine-dependent methyltransferase; required for wybutosine formation in phenylalanine-accepting tRNA; member of the seven beta-strand family
snR64	SNR64	ncRNA	0.938927	Yes	Yes	NA	0.377041	C/D box small nucleolar RNA (snoRNA); guides 2'-O-methylation of large subunit (LSU) rRNA at position C2337
YFR043C	IRC6	PCG	0.938863	No	No	0.4	0.872605	Putative protein of unknown function; null mutant displays increased levels of spontaneous Rad52p foci
chrIII_305604_306592	chrIII_305604_306592	Intergenic	0.938855	No	No	NA	NA	NA
YFL004W	VTC2	PCG	0.938836	No	No	0.7	-0.523878	Subunit of vacuolar transporter chaperone (VTC) complex; involved in membrane trafficking, vacuolar polyphosphate accumulation, microautophagy and non-autophagic vacuolar fusion; VTC2 has a paralog, VTC3, that arose from the whole genome duplication
chrVII_653125_654498	chrVII_653125_654498	Intergenic	0.938759	No	No	NA	NA	NA
YGR136W	LSB1	PCG	0.938744	No	No	1.73	0.6892	Negative regulator of actin nucleation-promoting factor activity; interacts with Las17p, a homolog of human Wiskott-Aldrich Syndrome protein (WASP), via an N-terminal SH3 domain, and along with PIN3 cooperatively inhibits the nucleation of actin filaments; overexpression blocks receptor-mediated endocytosis; protein increases in abundance and forms nuclear foci in response to DNA replication stre…
YGR137W	YGR137W	PCG	0.938744	No	No	2.17	0.446597	Dubious open reading frame; unlikely to encode a functional protein, based on available experimental and comparative sequence data
YDL088C	ASM4	Antisens	0.938685	No	No	NA	0.53678	FG-nucleoporin component of central core of nuclear pore complex (NPC); contributes directly to nucleocytoplasmic transport; induces membrane tubulation, which may contribute to nuclear pore assembly; ASM4 has a paralog, NUP53, that arose from the whole genome duplication
YERCdelta14	YERCdelta14	long_terminal_repeat	0.938636	No	No	NA	NA	Ty1 LTR
snR52	SNR52	ncRNA	0.938636	Yes	Yes	NA	0.272189	C/D box small nucleolar RNA (snoRNA); guides 2'-O-methylation of large subunit (LSU) rRNA at position U2921 and small subunit (SSU) rRNA at position A420
YCL027W	FUS1	Antisens	0.9386	No	No	NA	0.713813	Membrane protein localized to the shmoo tip; required for cell fusion; expression regulated by mating pheromone; proposed to coordinate signaling, fusion, and polarization events required for fusion; potential Cdc28p substrate
YDL180W	YDL180W	PCG	0.938541	No	No	0.7	0.859899	Putative protein of unknown function; green fluorescent protein (GFP)-fusion protein localizes to the vacuole
YOL063C	CRT10	PCG	0.938486	No	No	0.6	0.668744	Protein involved in transcriptional regulation of RNR2 and RNR3; expression of the gene is induced by DNA damage and null mutations confer increased resistance to hydroxyurea; N-terminal region has a leucine repeat and a WD40 repeat
YMR274C	RCE1	Antisens	0.93846	No	No	NA	0.564229	Type II CAAX prenyl protease; involved in the proteolysis and maturation of Ras and the a-factor mating pheromone
YJL151C	SNA3	PCG	0.938443	No	No	3.4	0.886849	Protein involved in efficient MVB sorting of proteins to the vacuole; may function as an RSP5 adapter protein for MVB cargos; integral membrane protein localized to vacuolar intralumenal vesicles
YDR291W	HRQ1	PCG	0.938424	No	No	0.86	0.67409	3'-5' DNA helicase that has DNA strand annealing activity; helicase activity is stimulated by fork structure and 3'-tail length of substrates; belongs to the widely conserved RecQ family of proteins which are involved in maintaining genomic integrity; similar to the human RecQ4p implicated in Rothmund-Thomson syndrome (RTS)
YEL023C	YEL023C	PCG	0.938411	No	No	0.2	0.902092	Putative protein of unknown function; expression is increased greatly during sporulation; YEL023C is not an essential gene
chrIX_249068_249849	chrIX_249068_249849	Intergenic	0.93839	No	No	NA	NA	NA
tV(AAC)K2	tV(AAC)K2	ncRNA	0.938386	No	No	NA	NA	Valine tRNA (tRNA-Val), predicted by tRNAscan-SE analysis
YHR161C	YAP1801	Antisens	0.938385	No	No	NA	0.886221	Protein of the AP180 family, involved in clathrin cage assembly; binds Pan1p and clathrin; YAP1801 has a paralog, YAP1802, that arose from the whole genome duplication
YKL165C	MCD4	Antisens	0.938342	No	No	NA	1.0401	Protein involved in GPI anchor synthesis; multimembrane-spanning protein that localizes to the endoplasmic reticulum; highly conserved among eukaryotes; GPI stands for glycosylphosphatidylinositol
YIL013C	PDR11	PCG	0.938324	No	No	0.4	0.836837	ATP-binding cassette (ABC) transporter; multidrug transporter involved in multiple drug resistance; mediates sterol uptake when sterol biosynthesis is compromised; regulated by Pdr1p; required for anaerobic growth; PDR11 has a paralog, AUS1, that arose from the whole genome duplication
YHR183W	GND1	PCG	0.938317	No	Yes	15.08	-0.307878	6-phosphogluconate dehydrogenase (decarboxylating); catalyzes an NADPH regenerating reaction in the pentose phosphate pathway; required for growth on D-glucono-delta-lactone and adaptation to oxidative stress; GND1 has a paralog, GND2, that arose from the whole genome duplication
YJL039C	NUP192	PCG	0.938306	No	Yes	0.3	0.40496	Essential subunit of the inner ring of the nuclear pore complex (NPC); contributes to nucleocytoplasmic transport; homologous to human NUP205
YOR067C	ALG8	PCG	0.938183	No	No	2.09	0.55947	Glucosyl transferase; involved in N-linked glycosylation; adds glucose to the dolichol-linked oligosaccharide precursor prior to transfer to protein during lipid-linked oligosaccharide biosynthesis; similar to Alg6p
YBR001C	NTH2	PCG	0.938183	No	No	0.4	0.779403	Putative neutral trehalase, required for thermotolerance; may mediate resistance to other cellular stresses; NTH2 has a paralog, NTH1, that arose from the whole genome duplication
YML086C	ALO1	PCG	0.938173	No	No	2.98	0.206448	D-Arabinono-1,4-lactone oxidase; catalyzes the final step in biosynthesis of dehydro-D-arabinono-1,4-lactone, which is protective against oxidative stress
YOR373W	NUD1	Antisens	0.938149	No	No	NA	0.212879	Component of the spindle pole body outer plaque; acts through the mitotic exit network to specify asymmetric spindle pole body inheritance
YDL185W	VMA1	PCG	0.937999	No	Yes	6.76	-0.370415	Subunit A of the V1 peripheral membrane domain of V-ATPase; protein precursor undergoes self-catalyzed splicing to yield the extein Tfp1p and the intein Vde (PI-SceI), which is a site-specific endonuclease; the V1 peripheral membrane domain of the vacuolar H+-ATPase (V-ATPase) has eight subunits
snR69	SNR69	ncRNA	0.937999	Yes	Yes	NA	-0.0538276	C/D box small nucleolar RNA (snoRNA); guides 2'-O-methylation of large subunit (LSU) rRNA at position C2948
chrXVI_254449_254673	chrXVI_254449_254673	Intergenic	0.937959	No	No	NA	NA	NA
YDL105W	NSE4	PCG	0.937939	No	No	0.3	0.826498	Component of the SMC5-SMC6 complex; this complex plays a key role in the removal of X-shaped DNA structures that arise between sister chromatids during DNA replication and repair
YIL006W	YIA6	PCG	0.937875	No	No	1.21	0.711689	Mitochondrial NAD+ transporter; involved in the transport of NAD+ into the mitochondria (see also YEA6); member of the mitochondrial carrier subfamily; disputed role as a pyruvate transporter; has putative mouse and human orthologs; YIA6 has a paralog, YEA6, that arose from the whole genome duplication
YPL167C	REV3	Antisens	0.937812	No	No	NA	0.731257	Catalytic subunit of DNA polymerase zeta; involved in translesion synthesis during post-replication repair; required for mutagenesis induced by DNA damage; involved in double-strand break repair
YFL030W	AGX1	Antisens	0.937811	No	No	NA	0.959001	Alanine:glyoxylate aminotransferase (AGT); catalyzes the synthesis of glycine from glyoxylate, which is one of three pathways for glycine biosynthesis in yeast; has similarity to mammalian and plant alanine:glyoxylate aminotransferases
YOR231W	MKK1	Antisens	0.937801	No	No	NA	0.570541	MAPKK involved in the protein kinase C signaling pathway; involved in control of cell integrity; upon activation by Bck1p phosphorylates downstream target, Slt2p; functionally redundant with Mkk2p; MKK1 has a paralog, MKK2, that arose from the whole genome duplication
YFR014C	CMK1	PCG	0.937778	No	No	0.4	0.761846	Calmodulin-dependent protein kinase; may play a role in stress response, many Ca++/calmodulin dependent phosphorylation substrates demonstrated in vitro, amino acid sequence similar to mammalian Cam Kinase II; CMK1 has a paralog, CMK2, that arose from the whole genome duplication
YGL137W	SEC27	PCG	0.937777	No	No	2.6	-0.0728486	Essential beta'-coat protein of the COPI coatomer; involved in ER-to-Golgi and Golgi-to-ER transport; contains WD40 domains that mediate cargo selective interactions; 45% sequence identity to mammalian beta'-COP
YDL103C	QRI1	Antisens	0.937682	No	No	NA	0.593015	UDP-N-acetylglucosamine pyrophosphorylase; catalyzes the formation of UDP-N-acetylglucosamine (UDP-GlcNAc), which is important in cell wall biosynthesis, protein N-glycosylation, and GPI anchor biosynthesis; protein abundance increases in response to DNA replication stress
YOR149C	SMP3	Antisens	0.937662	No	No	NA	0.696363	Alpha 1,2-mannosyltransferase; involved in glycosyl phosphatidyl inositol (GPI) biosynthesis; required for addition of the fourth, side branching mannose to the GPI core structure
YPR151C	SUE1	PCG	0.93766	No	No	1.37	0.0177987	Protein required for degradation of unstable forms of cytochrome c; located in the mitochondria
YPL112C	PEX25	PCG	0.937647	No	Yes	0.9	0.568098	Peripheral peroxisomal membrane peroxin; required for the regulation of peroxisome size and maintenance, recruits GTPase Rho1p to peroxisomes, induced by oleate, interacts with Pex27p; PEX25 has a paralog, PEX27, that arose from the whole genome duplication
YOL090W	MSH2	Antisens	0.937638	No	No	NA	0.413798	Protein that binds to DNA mismatches; forms heterodimers with Msh3p and Msh6p that bind to DNA mismatches to initiate the mismatch repair process; contains a Walker ATP-binding motif required for repair activity and involved in interstrand cross-link repair; Msh2p-Msh6p binds to and hydrolyzes ATP
YKL015W	PUT3	PCG	0.937624	No	No	0.4	0.591109	Transcriptional activator; binds specific gene recruitment sequences and is required for DNA zip code-mediated targeting of genes to nuclear periphery; regulates proline utilization genes, constitutively binds PUT1 and PUT2 promoters as a dimer, undergoes conformational change to form active state; binds other promoters only under activating conditions; differentially phosphorylated in presence o…
YML104C	MDM1	PCG	0.937565	No	No	0.3	0.634501	Intermediate filament protein; required for nuclear and mitochondrial transmission to daughter buds; contains a Phox homology (PX) domain and specifically binds phosphatidylinositol 3-phosphate (PtdIns-3-P)
YOR358W	HAP5	Antisens	0.937459	No	No	NA	0.794219	Subunit of the Hap2p/3p/4p/5p CCAAT-binding complex; complex is heme-activated and glucose repressed; complex is a transcriptional activator and global regulator of respiratory gene expression; required for assembly and DNA binding activity of the complex
YNR041C	COQ2	PCG	0.937409	No	No	1.91	0.623986	Para hydroxybenzoate polyprenyl transferase; catalyzes the second step in ubiquinone (coenzyme Q) biosynthesis; human COQ2, mutations in which are implicated in an increased risk of mutiple-system atrophy, is able to complement a yeast coq2 null mutant
YBR180W	DTR1	Antisens	0.937389	No	No	NA	0.708273	Putative dityrosine transporter of the major facilitator superfamily; member of the 12-spanner drug:H(+) antiporter DHA1 family; required for spore wall synthesis; sequence similarity to QDR1 and QDR3, and the triple mutant dtr1 qdr1 qdr3 exhibits reduced dityrosine fluorescence relative to the single mutants; expressed during sporulation
YMR140W	SIP5	Antisens	0.937388	No	No	NA	1.02246	Protein of unknown function; interacts with both the Reg1p/Glc7p phosphatase and the Snf1p kinase; forms cytoplasmic foci upon DNA replication stress
YLL039C	UBI4	Antisens	0.937384	No	No	NA	1.09298	Ubiquitin; becomes conjugated to proteins, marking them for selective degradation via the ubiquitin-26S proteasome system; essential for the cellular stress response; encoded as a polyubiquitin precursor comprised of 5 head-to-tail repeats; protein abundance increases in response to DNA replication stress
YKL171W	NNK1	Antisens	0.937359	No	No	NA	0.705931	Protein kinase; implicated in proteasome function; interacts with TORC1, Ure2 and Gdh2; overexpression leads to hypersensitivity to rapamycin and nuclear accumulation of Gln3; epitope-tagged protein localizes to the cytoplasm
YIL156W	UBP7	Antisens	0.937275	No	No	NA	0.716657	Ubiquitin-specific protease that cleaves ubiquitin-protein fusions; UBP7 has a paralog, UBP11, that arose from the whole genome duplication
YPL036W	PMA2	PCG	0.937184	No	No	0.2	0.44708	Plasma membrane H+-ATPase; isoform of Pma1p, involved in pumping protons out of the cell; regulator of cytoplasmic pH and plasma membrane potential
YGR280C	PXR1	PCG	0.937167	No	Yes	1.9	0.133998	Essential protein involved in rRNA and snoRNA maturation; competes with TLC1 RNA for binding to Est2p, suggesting a role in negative regulation of telomerase; human homolog inhibits telomerase; contains a G-patch RNA interacting domain
YDL103C	QRI1	PCG	0.937157	No	No	1.5	0.593015	UDP-N-acetylglucosamine pyrophosphorylase; catalyzes the formation of UDP-N-acetylglucosamine (UDP-GlcNAc), which is important in cell wall biosynthesis, protein N-glycosylation, and GPI anchor biosynthesis; protein abundance increases in response to DNA replication stress
YBR295W	PCA1	Antisens	0.937142	No	No	NA	0.894092	Cadmium transporting P-type ATPase; may also have a role in copper and iron homeostasis; stabilized by Cd binding, which prevents ubiquitination; S288C and other lab strains contain a G970R mutation which eliminates Cd transport function
YHR165C	PRP8	Antisens	0.937056	No	No	NA	0.527146	Component of U4/U6-U5 snRNP complex; involved in second catalytic step of splicing; participates in spliceosomal assembly through its interaction with U1 snRNA; mutations of human Prp8 cause retinitis pigmentosa
YDR303C	RSC3	PCG	0.936955	No	No	0.4	0.50357	Component of the RSC chromatin remodeling complex; essential gene required for maintenance of proper ploidy and regulation of ribosomal protein genes and the cell wall/stress response; RSC3 has a paralog, RSC30, that arose from the whole genome duplication
chrXIII_601011_601421	chrXIII_601011_601421	Intergenic	0.93692	No	No	NA	NA	NA
YJR001W	AVT1	PCG	0.936866	No	Yes	1.5	0.596745	Vacuolar transporter; imports large neutral amino acids into the vacuole; member of a family of seven S. cerevisiae genes (AVT1-7) related to vesicular GABA-glycine transporters
YPR026W	ATH1	PCG	0.936787	No	No	0.2	0.931829	Acid trehalase required for utilization of extracellular trehalose; involved in intracellular trehalose degradation during growth recovery after saline stress
YNL164C	IBD2	Antisens	0.936724	No	No	NA	0.534262	Component of the BUB2-dependent spindle checkpoint pathway; interacts with Bfa1p and functions upstream of Bub2p and Bfa1p
YOR139C	YOR139C	PCG	0.936689	No	No	1.49	0.127695	Dubious open reading frame; unlikely to encode a functional protein, based on available experimental and comparative sequence data; partially overlaps the verified ORF SFL1/YOR140W
YNL172W	APC1	PCG	0.936587	No	No	0.6	0.727556	Largest subunit of the Anaphase-Promoting Complex/Cyclosome; APC/C is a ubiquitin-protein ligase required for degradation of anaphase inhibitors, including mitotic cyclins, during the metaphase/anaphase transition; component of the platform domain of the APC/C, based on structural analysis; localizes to nuclear foci that become diffuse upon DNA replication stress
chrXV_347090_349539	chrXV_347090_349539	Intergenic	0.936578	No	No	NA	NA	NA
chrVIII_7685_7853	chrVIII_7685_7853	Intergenic	0.936568	No	No	NA	NA	NA
YGR134W	CAF130	PCG	0.936538	No	No	0.2	0.618725	Subunit of the CCR4-NOT transcriptional regulatory complex; CCR4-NOT complex is evolutionarily-conserved and involved in controlling mRNA initiation, elongation, and degradation
YPL127C	HHO1	Antisens	0.936435	No	No	NA	0.343197	Histone H1, linker histone with roles in meiosis and sporulation; decreasing levels early in sporulation may promote meiosis, and increasing levels during sporulation facilitate compaction of spore chromatin; binds to promoters and within genes in mature spores; may be recruited by Ume6p to promoter regions, contributing to transcriptional repression outside of meiosis; suppresses DNA repair invo…
chrXIV_552128_553241	chrXIV_552128_553241	Intergenic	0.93629	No	No	NA	NA	NA
YER046W	SPO73	PCG	0.936262	No	No	0.7	0.99001	Meiosis-specific protein of unknown function; required for spore wall formation during sporulation; dispensible for both nuclear divisions during meiosis
YER046W-A	YER046W-A	PCG	0.936262	No	No	NA	0.592982	Dubious open reading frame; unlikely to encode a functional protein, based on available experimental and comparative sequence data; overlaps ORF SAP1/YER047C
YPL274W	SAM3	Antisens	0.936255	No	No	NA	0.179886	High-affinity S-adenosylmethionine permease; required for utilization of S-adenosylmethionine as a sulfur source; has similarity to S-methylmethionine permease Mmp1p
YNR019W	ARE2	Antisens	0.93619	No	No	NA	0.503379	Acyl-CoA:sterol acyltransferase; endoplasmic reticulum enzyme that contributes the major sterol esterification activity in the presence of oxygen; ARE2 has a paralog, ARE1, that arose from the whole genome duplication
YBR275C	RIF1	Antisens	0.936153	No	No	NA	0.535799	Protein that binds to the Rap1p C-terminus; acts synergistically with Rif2p to help control telomere length and establish telomeric silencing; deletion results in telomere elongation
YDRWdelta7	YDRWdelta7	long_terminal_repeat	0.936153	No	No	NA	NA	Ty1 LTR
YPL269W	KAR9	Antisens	0.936147	No	No	NA	0.784279	Karyogamy protein; required for correct positioning of the mitotic spindle and for orienting cytoplasmic microtubules; localizes at the shmoo tip in mating cells and at the tip of the growing bud in small-budded cells through anaphase
YBL068W	PRS4	Antisens	0.936099	No	No	NA	-0.0394723	5-phospho-ribosyl-1(alpha)-pyrophosphate synthetase, synthesizes PRPP; which is required for nucleotide, histidine, and tryptophan biosynthesis; one of five related enzymes, which are active as heteromultimeric complexes; PRS4 has a paralog, PRS2, that arose from the whole genome duplication
YNL252C	MRPL17	Antisens	0.935993	No	No	NA	0.356786	Mitochondrial ribosomal protein of the large subunit
YFR016C	YFR016C	Antisens	0.935962	No	No	NA	0.512454	Putative protein of unknown function; green fluorescent protein (GFP)-fusion protein localizes to the cytoplasm and bud; interacts with Spa2p; YFL016C is not an essential gene
chrX_265186_265781	chrX_265186_265781	Intergenic	0.935906	No	No	NA	NA	NA
YGL012W	ERG4	Antisens	0.935873	No	No	NA	-0.066872	C-24(28) sterol reductase; catalyzes the final step in ergosterol biosynthesis; mutants are viable, but lack ergosterol
YIL057C	RGI2	PCG	0.93582	No	No	1.21	0.676398	Protein of unknown function; involved in energy metabolism under respiratory conditions; expression induced under carbon limitation and repressed under high glucose; RGI2 has a paralog, RGI1, that arose from the whole genome duplication
YMR016C	SOK2	PCG	0.935804	No	No	0.3	0.856605	Nuclear protein that negatively regulates pseudohyphal differentiation; plays a regulatory role in the cyclic AMP (cAMP)-dependent protein kinase (PKA) signal transduction pathway; relocalizes to the cytosol in response to hypoxia; SOK2 has a paralog, PHD1, that arose from the whole genome duplication
YLR151C	PCD1	PCG	0.935775	No	No	0.4	0.716487	8-oxo-dGTP diphosphatase; prevents spontaneous mutagenesis via sanitization of oxidized purine nucleoside triphosphates; can also act as peroxisomal pyrophosphatase with specificity for coenzyme A and CoA derivatives, may function to remove potentially toxic oxidized CoA disulfide from peroxisomes to maintain the capacity for beta-oxidation of fatty acids; nudix hydrolase family member; similar E…
YKL175W	ZRT3	Antisens	0.935765	No	No	NA	0.300932	Vacuolar membrane zinc transporter; transports zinc from storage in the vacuole to the cytoplasm when needed; transcription is induced under conditions of zinc deficiency
chrV_194678_195027	chrV_194678_195027	Intergenic	0.935599	No	No	NA	NA	NA
YMR082C	YMR082C	Antisens	0.935522	No	No	NA	0.47316	Dubious open reading frame; unlikely to encode a functional protein, based on available experimental and comparative sequence data
YER077C	YER077C	Antisens	0.935437	No	No	NA	0.902653	Putative protein of unknown function; green fluorescent protein (GFP)-fusion protein localizes to the mitochondrion; null mutation results in a decrease in plasma membrane electron transport
YNR059W	MNT4	PCG	0.935377	No	No	0.4	1.01488	Putative alpha-1,3-mannosyltransferase; not required for protein O-glycosylation
YNL176C	TDA7	Antisens	0.935369	No	No	NA	0.708849	Cell cycle-regulated gene of unknown function; promoter bound by Fkh2p; null mutant is sensitive to expression of the top1-T722A allele; TDA7 has a paralog, YDL211C, that arose from the whole genome duplication
YDR348C	PAL1	Antisens	0.935345	No	No	NA	0.626807	Protein of unknown function thought to be involved in endocytosis; physically interacts with Ede1p and is found at endocytic sites at cell periphery during early stages of endocytosis; green fluorescent protein (GFP)-fusion protein localizes to bud neck; potential Cdc28p substrate; similar to S. pombe Pal1 protein; relocalizes from bud neck to cytoplasm upon DNA replication stress; PAL1 has a par…
YNR051C	BRE5	Antisens	0.935323	No	No	NA	0.309384	Ubiquitin protease cofactor; forms deubiquitination complex with Ubp3p that coregulates anterograde and retrograde transport between the endoplasmic reticulum and Golgi compartments; null is sensitive to brefeldin A
chrXI_552024_552272	chrXI_552024_552272	Intergenic	0.935213	No	No	NA	NA	NA
YHR117W	TOM71	Antisens	0.935195	No	No	NA	0.105363	Mitochondrial outer membrane protein; probable minor component of the TOM (translocase of outer membrane) complex responsible for recognition and import of mitochondrially directed proteins; TOM71 has a paralog, TOM70, that arose from the whole genome duplication
YER117W	RPL23B	PCG	0.935183	No	No	56.26	-0.841387	Ribosomal 60S subunit protein L23B; homologous to mammalian ribosomal protein L23 and bacterial L14; RPL23B has a paralog, RPL23A, that arose from the whole genome duplication
YMR205C	PFK2	PCG	0.935171	No	No	6.56	-0.421919	Beta subunit of heterooctameric phosphofructokinase; involved in glycolysis; indispensable for anaerobic growth; activated by fructose-2,6-bisphosphate and AMP; mutation inhibits glucose induction of cell cycle-related genes
YLR382C	NAM2	Antisens	0.935159	No	No	NA	0.624373	Mitochondrial leucyl-tRNA synthetase; also has a direct role in splicing of several mitochondrial group I introns; indirectly required for mitochondrial genome maintenance
YKL203C	TOR2	PCG	0.935125	No	No	1	0.641235	PIK-related protein kinase and rapamycin target; subunit of TORC1, a complex that regulates growth in response to nutrients and TORC2, a complex that regulates cell-cycle dependent polarization of the actin cytoskeleton; involved in meiosis; TOR2 has a paralog, TOR1, that arose from the whole genome duplication
YDL141W	BPL1	PCG	0.935094	No	No	0.81	0.396908	Biotin:apoprotein ligase; covalently modifies proteins with the addition of biotin, required for acetyl-CoA carboxylase (Acc1p) holoenzyme formation
YKL118W	YKL118W	PCG	0.935002	No	No	3.17	0.369046	Dubious open reading frame; unlikely to encode a functional protein, based on available experimental and comparative sequence data; partially overlaps the verified gene VPH2
YDL030W	PRP9	PCG	0.934988	No	Yes	0.4	0.820429	Subunit of the SF3a splicing factor complex; required for spliceosome assembly; acts after the formation of the U1 snRNP-pre-mRNA complex
YBR067C	TIP1	Antisens	0.934957	No	No	NA	0.212361	Major cell wall mannoprotein with possible lipase activity; transcription is induced by heat- and cold-shock; member of the Srp1p/Tip1p family of serine-alanine-rich proteins
YLR115W	CFT2	PCG	0.934843	No	No	0.6	0.534804	Subunit of the mRNA cleavage and polyadenlylation factor (CPF); required for pre-mRNA cleavage, polyadenylation and poly(A) site recognition, 43% similarity with the mammalian CPSF-100 protein.
YNL139C	THO2	Antisens	0.934802	No	No	NA	0.549297	Subunit of the THO complex; THO is required for efficient transcription elongation and involved in transcriptional elongation-associated recombination; required for LacZ RNA expression from certain plasmids
YNL140C	YNL140C	Antisens	0.934802	No	No	NA	0.538474	Protein of unknown function; expressed at both mRNA and protein levels; partially overlaps THO2/YNL139C
YJR031C	GEA1	PCG	0.934717	No	No	0.6	0.458221	Guanine nucleotide exchange factor for ADP ribosylation factors (ARFs); involved in vesicular transport between the Golgi and ER, Golgi organization, and actin cytoskeleton organization; GEA1 has a paralog, GEA2, that arose from the whole genome duplication
YFR030W	MET10	PCG	0.934706	No	No	0.4	0.563791	Subunit alpha of assimilatory sulfite reductase; complex converts sulfite into sulfide
YAL029C	MYO4	PCG	0.934664	No	No	1.05	0.548575	Type V myosin motor involved in actin-based transport of cargos; required for mRNA transport, including ASH1 mRNA, and facilitating the growth and movement of ER tubules into the growing bud along with She3p; MYO4 has a paralog, MYO2, that arose from the whole genome duplication
YOR289W	YOR289W	PCG	0.934663	No	No	0.3	1.03558	Putative protein of unknown function; transcription induced by the unfolded protein response; green fluorescent protein (GFP)-fusion protein localizes to both the cytoplasm and the nucleus
snR84	SNR84	ncRNA	0.934628	No	Yes	NA	-0.215353	H/ACA box small nucleolar RNA (snoRNA); guides pseudouridylation of large subunit (LSU) rRNA at position U2266
YBR093C	PHO5	Antisens	0.934604	No	No	NA	-0.768293	Repressible acid phosphatase; 1 of 3 repressible acid phosphatases that also mediates extracellular nucleotide-derived phosphate hydrolysis; secretory pathway derived cell surface glycoprotein; induced by phosphate starvation and coordinately regulated by PHO4 and PHO2
YMR201C	RAD14	Antisens	0.934492	No	No	NA	NA	Protein that recognizes and binds damaged DNA during NER; subunit of Nucleotide Excision Repair Factor 1 (NEF1); contains zinc finger motif; homolog of human XPA protein; NER stands for nucleotide excision repair
YGR077C	PEX8	Antisens	0.934458	No	No	NA	0.824422	Intraperoxisomal organizer of the peroxisomal import machinery; organizes the formation of the importomer complex, bridging the docking complex with the RING finger complex; tightly associated with the lumenal face of the peroxisomal membrane; essential for peroxisome biogenesis; binds PTS1-signal receptor Pex5p, and PTS2-signal receptor Pex7p
YPL069C	BTS1	Antisens	0.934445	No	No	NA	0.536509	Geranylgeranyl diphosphate synthase; increases the intracellular pool of geranylgeranyl diphosphate, suppressor of bet2 mutation that causes defective geranylgeranylation of small GTP-binding proteins that mediate vesicular traffic
YDL132W	CDC53	PCG	0.934444	No	No	1.27	0.682671	Cullin; structural protein of SCF complexes (which also contain Skp1p, Cdc34p, Hrt1p and an F-box protein) involved in ubiquitination; SCF promotes the G1-S transition by targeting G1 cyclins and the Cln-CDK inhibitor Sic1p for degradation
YMR026C	PEX12	PCG	0.934283	No	No	0.4	0.65891	C3HC4-type RING-finger peroxin and E3 ubiquitin ligase; required for peroxisome biogenesis and peroxisomal matrix protein import; forms translocation subcomplex with Pex2p and Pex10p; mutations in human homolog cause peroxisomal disorder
YDR246W	TRS23	Antisens	0.934276	No	No	NA	0.823502	Core component of transport protein particle (TRAPP) complexes I-III; TRAPP complexes are related multimeric guanine nucleotide-exchange factor for the GTPase Ypt1p, regulating ER-Golgi traffic (TRAPPI), intra-Golgi traffic (TRAPPII), endosome-Golgi traffic (TRAPPII and III) and autophagy (TRAPPIII); human homolog is TRAPPC4
YDR011W	SNQ2	Antisens	0.934275	No	No	NA	0.225671	Plasma membrane ATP-binding cassette (ABC) transporter; multidrug transporter involved in multidrug resistance and resistance to singlet oxygen species
snR39B	SNR39B	ncRNA	0.934268	Yes	Yes	NA	1.04341	C/D box small nucleolar RNA (snoRNA); guides 2'-O-methylation of large subunit (LSU) rRNA at position G805
YPL104W	MSD1	Antisens	0.934249	No	No	NA	0.576075	Mitochondrial aspartyl-tRNA synthetase; required for acylation of aspartyl-tRNA; yeast and bacterial aspartyl-, asparaginyl-, and lysyl-tRNA synthetases contain regions with high sequence similarity, suggesting a common ancestral gene
YAR030C	YAR030C	PCG	0.934196	No	No	1.35	0.799432	Dubious open reading frame; unlikely to encode a functional protein, based on available experimental and comparative sequence data; partially overlaps the uncharacterized ORF YAR029W and the verified gene PRM9
YDR495C	VPS3	PCG	0.93415	No	No	0.3	0.687299	Component of CORVET tethering complex; cytoplasmic protein required for the sorting and processing of soluble vacuolar proteins, acidification of the vacuolar lumen, and assembly of the vacuolar H+-ATPase
chrV_151117_153379	chrV_151117_153379	Intergenic	0.934123	No	No	NA	NA	NA
YDR495C	VPS3	Antisens	0.9341	No	No	NA	0.687299	Component of CORVET tethering complex; cytoplasmic protein required for the sorting and processing of soluble vacuolar proteins, acidification of the vacuolar lumen, and assembly of the vacuolar H+-ATPase
chrXIII_923153_923352	chrXIII_923153_923352	Intergenic	0.934087	No	No	NA	NA	NA
YAL063C	FLO9	Antisens	0.934084	No	No	NA	0.798595	Lectin-like protein with similarity to Flo1p; thought to be expressed and involved in flocculation
YPL239W	YAR1	Antisens	0.934056	No	No	NA	0.467084	Ankyrin-repeat containing, nucleocytoplasmic shuttling chaperone; prevents aggregation of Rps3p in the cytoplasm, associates with free Rps3p in the cytoplasm and delivers it to the 90S in the nucleus; required for 40S ribosomal subunit export, biogenesis and adaptation to osmotic and oxidative stress; expression repressed by heat shock
YJR062C	NTA1	PCG	0.934047	No	No	0.4	0.695678	Amidase; removes the amide group from N-terminal asparagine and glutamine residues to generate proteins with N-terminal aspartate and glutamate residues that are targets of ubiquitin-mediated degradation
YGR289C	MAL11	PCG	0.934043	No	No	0.2	0.965543	High-affinity maltose transporter (alpha-glucoside transporter); inducible; encoded in the MAL1 complex locus; broad substrate specificity that includes maltotriose; required for isomaltose utilization
chrVII_989564_991041	chrVII_989564_991041	Intergenic	0.934008	No	No	NA	NA	NA
YGR197C	SNG1	PCG	0.934004	No	No	0.81	0.596006	Protein involved in resistance to nitrosoguanidine and 6-azauracil; expression is regulated by transcription factors involved in multidrug resistance; SNG1 has a paralog, YJR015W, that arose from the whole genome duplication
YDR021W	FAL1	PCG	0.934004	No	No	1	0.598358	Nucleolar protein required for maturation of 18S rRNA; member of the eIF4A subfamily of DEAD-box ATP-dependent RNA helicases
chrVI_255176_258702	chrVI_255176_258702	Intergenic	0.933932	No	No	NA	NA	NA
YLR356W	ATG33	Antisens	0.933885	No	No	NA	0.76085	Mitochondrial mitophagy-specific protein; required primarily for mitophagy induced at post-log phase; not required for other types of selective autophagy or macroautophagy; conserved within fungi, but not in higher eukaryotes; ATG33 has a paralog, SCM4, that arose from the whole genome duplication
YPR003C	YPR003C	PCG	0.933842	No	No	0.3	0.867655	Putative sulfate permease; physically interacts with Hsp82p; green fluorescent protein (GFP)-fusion protein localizes to the ER; YPR003C is not an essential gene
YLR433C	CNA1	Antisens	0.933761	No	No	NA	0.515209	Calcineurin A; one isoform (the other is Cmp2p) of the catalytic subunit of calcineurin, a Ca++/calmodulin-regulated protein phosphatase which regulates Crz1p (a stress-response transcription factor), the other calcineurin subunit is CNB1; regulates the function of Aly1p alpha-arrestin; CNA1 has a paralog, CMP2, that arose from the whole genome duplication
YLR434C	YLR434C	Antisens	0.933761	No	No	NA	0.424097	Dubious open reading frame; unlikely to encode a functional protein, based on available experimental and comparative sequence data; partially overlaps the verified ORF TSR2/YLR435W
YDR357C	CNL1	Antisens	0.933662	No	No	NA	0.950208	Subunit of the BLOC-1 complex involved in endosomal maturation; interacts with Msb3p; null mutant is sensitive to drug inducing secretion of vacuolar cargo; green fluorescent protein (GFP)-fusion protein localizes to the cytoplasm
YKL132C	RMA1	PCG	0.933661	No	No	0.3	0.862372	Putative dihydrofolate synthetase; similar to E. coli folylpolyglutamate synthetase/dihydrofolate synthetase; the authentic, non-tagged protein is detected in highly purified mitochondria in high-throughput studies; RMA1 has a paralog, FOL3, that arose from the whole genome duplication
YLR420W	URA4	PCG	0.933625	No	No	3.59	-0.674742	Dihydroorotase; catalyzes the third enzymatic step in the de novo biosynthesis of pyrimidines, converting carbamoyl-L-aspartate into dihydroorotate
YOR236W	DFR1	Antisens	0.933608	No	No	NA	0.710477	Dihydrofolate reductase involved in tetrahydrofolate biosynthesis; required for respiratory metabolism
YJL029C	VPS53	PCG	0.933527	No	No	0.4	0.419517	Component of the GARP (Golgi-associated retrograde protein) complex; this complex is required for the recycling of proteins from endosomes to the late Golgi; required for vacuolar protein sorting; members of the GARP complex are Vps51p-Vps52p-Vps53p-Vps54p,
YPL165C	SET6	Antisens	0.933523	No	No	NA	0.922509	SET domain protein of unknown function; deletion heterozygote is sensitive to compounds that target ergosterol biosynthesis, may be involved in compound availability
YNL270C	ALP1	PCG	0.933523	No	No	1.49	0.803977	Arginine transporter; expression is normally very low and it is unclear what conditions would induce significant expression; ALP1 has a paralog, CAN1, that arose from the whole genome duplication
YPL085W	SEC16	PCG	0.933489	No	No	0.8	0.200726	COPII vesicle coat protein required for ER transport vesicle budding; essential factor in endoplasmic reticulum exit site (ERES) formation, as well as in COPII-mediated ER-to-Golgi traffic; bound to periphery of ER membranes and may act to stabilize initial COPII complexes; interacts with Sec23p, Sec24p and Sec31p
YKR054C	DYN1	Antisens	0.933488	No	No	NA	0.711287	Cytoplasmic heavy chain dynein; microtubule motor protein, required for anaphase spindle elongation; involved in spindle assembly, chromosome movement, and spindle orientation during cell division, targeted to microtubule tips by Pac1p; motility along microtubules inhibited by She1p
YNL241C	ZWF1	PCG	0.93343	No	No	2.91	0.485784	Glucose-6-phosphate dehydrogenase (G6PD); catalyzes the first step of the pentose phosphate pathway; involved in adapting to oxidatve stress; homolog of the human G6PD which is deficient in patients with hemolytic anemia; protein abundance increases in response to DNA replication stress
YKL150W	MCR1	Antisens	0.933428	No	No	NA	1.15368	Mitochondrial NADH-cytochrome b5 reductase; involved in ergosterol biosynthesis
YEL043W	YEL043W	Antisens	0.933425	No	No	NA	0.464686	Predicted cytoskeleton protein involved in intracellular signaling; based on quantitative analysis of protein-protein interaction maps; may interact with ribosomes, based on co-purification studies; contains fibronectin type III domain fold
YKL064W	MNR2	Antisens	0.933324	No	No	NA	0.596237	Vacuolar membrane protein required for magnesium homeostasis; putative magnesium transporter; has similarity to Alr1p and Alr2p, which mediate influx of Mg2+ and other divalent cations
chrX_724034_725638	chrX_724034_725638	Intergenic	0.933274	No	No	NA	NA	NA
YIL107C	PFK26	PCG	0.933271	No	No	0.7	0.976207	6-phosphofructo-2-kinase; inhibited by phosphoenolpyruvate and sn-glycerol 3-phosphate; has negligible fructose-2,6-bisphosphatase activity; transcriptional regulation involves protein kinase A
chrII_164915_165997	chrII_164915_165997	Intergenic	0.933252	No	No	NA	NA	NA
YKR001C	VPS1	PCG	0.933244	No	No	1.2	0.0376754	Dynamin-like GTPase required for vacuolar sorting; also involved in actin cytoskeleton organization, endocytosis, late Golgi-retention of some proteins, regulation of peroxisome biogenesis
YNL025C	SSN8	PCG	0.933203	No	No	0.1	0.703986	Cyclin-like component of the RNA polymerase II holoenzyme; involved in phosphorylation of the RNA polymerase II C-terminal domain; forms a kinase-cyclin pair in the RNAPII holoenzyme with Ssn3p; required for both entry into and execution of the meiotic program; involved in glucose repression and telomere maintenance; cyclin homolog 35% identical to human cyclin C
YHR103W	SBE22	PCG	0.933193	No	No	1.17	0.490718	Protein involved in bud growth; involved in the transport of cell wall components from the Golgi to the cell surface; similar in structure and functionally redundant with Sbe2p; SBE22 has a paralog, SBE2, that arose from the whole genome duplication
YOR122C	PFY1	PCG	0.933189	No	No	12	0.189289	Profilin; binds actin, phosphatidylinositol 4,5-bisphosphate, and polyproline regions; involved in cytoskeleton organization; required for normal timing of actin polymerization in response to thermal stress; protein abundance increases in response to DNA replication stress
YKL009W	MRT4	Antisens	0.933149	No	No	NA	-0.0860716	Protein involved in mRNA turnover and ribosome assembly; required at post-transcriptional step for efficient retrotransposition; localizes to the nucleolus
chrIV_202711_202900	chrIV_202711_202900	Intergenic	0.933129	No	No	NA	NA	NA
YDR138W	HPR1	Antisens	0.933107	No	No	NA	0.728073	Subunit of THO/TREX complexes; this complex couple transcription elongation with mitotic recombination and with mRNA metabolism and export, subunit of an RNA Pol II complex; regulates lifespan; involved in telomere maintenance; similar to Top1p
YDR363W	ESC2	Antisens	0.933096	No	No	NA	0.825554	Sumo-like domain protein; prevents accumulation of toxic intermediates during replication-associated recombinational repair; roles in silencing, lifespan, chromatid cohesion and the intra-S-phase DNA damage checkpoint; RENi family member
YLR424W	SPP382	PCG	0.93309	No	No	0.2	0.901347	Essential protein that forms a dimer with Ntr2p; also forms a trimer, with Ntr2p and Prp43p, that is involved in spliceosome disassembly; found also in a multisubunit complex with the splicing factor Clf1p; suppressor of prp38-1 mutation
YCLCdelta1	YCLCdelta1	long_terminal_repeat	0.932992	No	Yes	NA	NA	Ty1 LTR
YFR024C-A	LSB3	PCG	0.932977	No	No	NA	0.181215	Protein containing a C-terminal SH3 domain; binds Las17p, which is a homolog of human Wiskott-Aldrich Syndrome protein involved in actin patch assembly and actin polymerization; protein abundance increases in response to DNA replication stress; LSB3 has a paralog, YSC84, that arose from the whole genome duplication
YOR318Ci	YOR318Ci	PCG (intron)	0.932945	No	No	NA	0.639987	NA
YGL131C	SNT2	Antisens	0.932938	No	No	NA	0.586339	Subunit of Snt2C complex, RING finger ubiquitin ligase (E3); physically associates with Ecm5p and Rpd3p; along with Ecm5p, recruits Rpd3p to small number of promoters; colocalizes with Ecm5p, independently of Rpd3p, to promoters of stress response genes upon oxidative stress; involved in ubiquitylation, degradation of excess histones; interacts with Ubc4p; role in regulating genes encoding amine …
YDR146C	SWI5	PCG	0.932908	No	No	0.78	0.704794	Transcription factor that recruits Mediator and Swi/Snf complexes; activates transcription of genes expressed at the M/G1 phase boundary and in G1 phase; required for expression of the HO gene controlling mating type switching; localization to nucleus occurs during G1 and appears to be regulated by phosphorylation by Cdc28p kinase; SWI5 has a paralog, ACE2, that arose from the whole genome duplic…
YNL250W	RAD50	PCG	0.932877	No	No	0.2	0.753904	Subunit of MRX complex with Mre11p and Xrs2p; complex is involved in processing double-strand DNA breaks in vegetative cells, initiation of meiotic DSBs, telomere maintenance, and nonhomologous end joining; forms nuclear foci upon DNA replication stress
YDR211W	GCD6	PCG	0.932791	No	Yes	2.2	0.286375	Catalytic epsilon subunit of the translation initiation factor eIF2B; eIF2B is the guanine-nucleotide exchange factor for eIF2; activity subsequently regulated by phosphorylated eIF2; first identified as a negative regulator of GCN4 expression; forms cytoplasmic foci upon DNA replication stress
YDR108W	TRS85	PCG	0.932783	No	No	0.6	0.710923	Component of transport protein particle (TRAPP) complex III; TRAPPIII is a multimeric guanine nucleotide-exchange factor for the GTPase Ypt1p, regulating endosome-Golgi traffic and required for membrane expansion during autophagy and the CVT pathway; directs Ypt1p to the PAS; late post-replication meiotic role
chrXVI_40217_40903	chrXVI_40217_40903	Intergenic	0.93274	No	No	NA	NA	NA
YGL017W	ATE1	Antisens	0.932721	No	No	NA	0.584667	Arginyl-tRNA-protein transferase; catalyzes post-translational conjugation of arginine to the amino termini of acceptor proteins which are then subject to degradation via the N-end rule pathway
YOR292C	YOR292C	PCG	0.932711	No	No	0.4	0.630568	Putative protein of unknown function; green fluorescent protein (GFP)-fusion protein localizes to the vacuole; YOR292C is not an essential gene
YAL046C	AIM1	Antisens	0.932706	No	No	NA	0.356644	Protein involved in mitochondrial function or organization; null mutant displays elevated frequency of mitochondrial genome loss
YGR109W-B	YGR109W-B	Antisens	0.932637	No	No	NA	0.978573	Retrotransposon TYA Gag and TYB Pol genes; transcribed/translated as one unit; polyprotein is processed to make a nucleocapsid-like protein (Gag), reverse transcriptase (RT), protease (PR), and integrase (IN); similar to retroviral genes
YDL246C	SOR2	PCG	0.932583	No	No	0.8	NA	Protein of unknown function; protein sequence is 99% identical to the Sor1p sorbitol dehydrogenase; computational analysis of large-scale protein-protein interaction data also suggests a role in fructose or mannose metabolism
YML063W	RPS1B	PCG	0.932565	No	No	12.36	-0.829855	Ribosomal protein 10 (rp10) of the small (40S) subunit; homologous to mammalian ribosomal protein S3A, no bacterial homolog; RPS1B has a paralog, RPS1A, that arose from the whole genome duplication
chrXIII_464966_466159	chrXIII_464966_466159	Intergenic	0.932529	No	No	NA	NA	NA
YDR170C	SEC7	Antisens	0.932496	No	No	NA	0.0640518	Guanine nucleotide exchange factor (GEF) for ADP ribosylation factors; involved in proliferation of the Golgi, intra-Golgi transport and ER-to-Golgi transport; found in the cytoplasm and on Golgi-associated coated vesicles
YML122C	YML122C	Antisens	0.932464	No	No	NA	0.955207	Dubious open reading frame; unlikely to encode a functional protein, based on available experimental and comparative sequence data
YNL093W	YPT53	Antisens	0.93241	No	No	NA	1.00746	Stress-induced Rab family GTPase; required for vacuolar protein sorting and endocytosis; involved in ionic stress tolerance; similar to Vps21p and Ypt52p; functional homolog of Vps21p; mammalian Rab5 homolog; YPT53 has a paralog, VPS21, that arose from the whole genome duplication
YLR333C	RPS25B	Antisens	0.932407	No	No	NA	-0.953871	Protein component of the small (40S) ribosomal subunit; homologous to mammalian ribosomal protein S25, no bacterial homolog; RPS25B has a paralog, RPS25A, that arose from the whole genome duplication
YGL069C	YGL069C	PCG	0.932401	No	No	1.21	-0.0746938	Dubious open reading frame; unlikely to encode a functional protein, based on available experimental and comparative sequence data; not conserved in closely related Saccharomyces species; 92% of ORF overlaps the uncharacterized ORF YGL068W; deletion in cyr1 mutant results in loss of stress resistance
YPR085C	ASA1	PCG	0.932356	No	No	0.3	0.726273	Subunit of the ASTRA complex, involved in chromatin remodeling; telomere length regulator involved in the stability or biogenesis of PIKKs such as TORC1
snR161	SNR161	ncRNA	0.932305	No	Yes	NA	0.527245	H/ACA small nucleolar RNA (snoRNA); guides pseudouridylation of small subunit (SSU) rRNA at positions U632 and U766
YBR024W	SCO2	Antisens	0.932286	No	No	NA	0.721255	Protein anchored to mitochondrial inner membrane; may have a redundant function with Sco1p in delivery of copper to cytochrome c oxidase; interacts with Cox2p; SCO2 has a paralog, SCO1, that arose from the whole genome duplication
YOR256C	TRE2	PCG	0.93226	No	No	0.7	0.80554	Transferrin receptor-like protein; functions with Tre1p to regulate ubiquitylation and vacuolar degradation of the metal transporter Smf1p; inviability of null mutant in systematic studies is due to proximity to CDC31; TRE2 has a paralog, TRE1, that arose from the whole genome duplication
YER171W	RAD3	Antisens	0.932259	No	No	NA	0.556397	5' to 3' DNA helicase; involved in nucleotide excision repair and transcription; subunit of RNA polII initiation factor TFIIH and of Nucleotide Excision Repair Factor 3 (NEF3); homolog of human XPD protein; mutant has aneuploidy tolerance; protein abundance increases in response to DNA replication stress
YMR093W	UTP15	Antisens	0.932258	No	No	NA	0.206144	Nucleolar protein; component of the small subunit (SSU) processome containing the U3 snoRNA that is involved in processing of pre-18S rRNA
YMR241W	YHM2	PCG	0.932213	No	No	4	-0.640179	Citrate and oxoglutarate carrier protein; exports citrate from and imports oxoglutarate into the mitochondrion, causing net export of NADPH reducing equivalents; also associates with mt nucleoids and has a role in replication and segregation of the mt genome
chrV_498556_499202	chrV_498556_499202	Intergenic	0.932199	No	No	NA	NA	NA
YPL058C	PDR12	PCG	0.932116	No	No	1.1	0.551527	Plasma membrane ATP-binding cassette (ABC) transporter; weak-acid-inducible multidrug transporter required for weak organic acid resistance; induced by sorbate and benzoate and regulated by War1p; mutants exhibit sorbate hypersensitivity
YJR144W	MGM101	PCG	0.931997	No	No	2.1	0.708764	Protein with a role in mitochondrial DNA recombinational repair; also involved in interstrand cross-link repair; binds to and catalyzes the annealing of single-stranded mtDNA; oligomerizes to form rings and filaments; related to Rad52-type recombination proteins, with limited overall similarity but sharing conserved functionally important residues; component of the mitochondrial nucleoid, require…
YDR103W	STE5	Antisens	0.931994	No	No	NA	0.76761	Pheromone-responsive MAPK scaffold protein; couples activation of the G-protein-coupled pheromone receptor to MAPK activation; intramolecular interaction of PH and VWA domains blocks activation of assembled signaling cascade components (Ste11p, Ste7p and Fus3p) under basal conditions; Gbeta-gamma (Ste4p-Ste18p)-dependent docking at the plasma membrane and binding of PI(4,5)P2 by the PH domain rel…
YER090W	TRP2	PCG	0.931971	No	No	1.49	-0.108978	Anthranilate synthase; catalyzes the initial step of tryptophan biosynthesis, forms multifunctional hetero-oligomeric anthranilate synthase:indole-3-glycerol phosphate synthase enzyme complex with Trp3p
YLR309C	IMH1	Antisens	0.931959	No	No	NA	0.431334	Protein involved in vesicular transport; mediates transport between an endosomal compartment and the Golgi, contains a Golgi-localization (GRIP) domain that interacts with activated Arl1p-GTP to localize Imh1p to the Golgi
YPL123C	RNY1	PCG	0.931937	No	No	0.2	0.64197	Vacuolar RNase of the T(2) family; relocalizes to the cytosol where it cleaves tRNAs upon oxidative or stationary phase stress; promotes apoptosis under stress conditions and this function is independent of its catalytic activity
YOL145C	CTR9	Antisens	0.931928	No	No	NA	0.269288	Component of the Paf1p complex involved in transcription elongation; binds to and modulates the activity of RNA polymerases I and II; required for expression of a subset of genes, including cyclin genes; involved in SER3 repression by helping to maintain SRG1 transcription-dependent nucleosome occupancy; contains TPR repeats
YCR092C	MSH3	PCG	0.931901	No	No	0.3	0.680367	Mismatch repair protein; forms dimers with Msh2p that mediate repair of insertion or deletion mutations and removal of nonhomologous DNA ends, contains a PCNA (Pol30p) binding motif required for genome stability
YDR406W	PDR15	PCG	0.931895	No	No	0.4	0.368861	Plasma membrane ATP binding cassette (ABC) transporter; multidrug transporter and general stress response factor implicated in cellular detoxification; regulated by Pdr1p, Pdr3p and Pdr8p; promoter contains a PDR responsive element; PDR15 has a paralog, PDR5, that arose from the whole genome duplication
YHL018W	YHL018W	Antisens	0.931868	No	No	NA	0.959796	Putative 4a-hydroxytetrahydrobiopterin dehydratase; green fluorescent protein (GFP)-fusion protein localizes to mitochondria and is induced in response to the DNA-damaging agent MMS
YDR150W	NUM1	PCG	0.931841	No	Yes	0.6	0.494778	Protein required for nuclear migration; component of the mitochondria-ER-cortex-ancor (MECA); required for the association of mitochondria with the cell cortex and for accurate distribution of mitochondrial network; interacts with Mdm36p to link the ER and motochondria at the cortex; localizes to the mother cell cortex and the bud tip; may mediate interactions of dynein and cytoplasmic microtubul…
YMR020W	FMS1	PCG	0.931834	No	No	0.7	0.95077	Polyamine oxidase; converts spermine to spermidine, which is required for the essential hypusination modification of translation factor eIF-5A; also involved in pantothenic acid biosynthesis
YML053C	YML053C	Antisens	0.931822	No	No	NA	0.603331	Putative protein of unknown function; green fluorescent protein (GFP)-fusion protein localizes to the cytoplasm and the nucleus; overexpression causes a cell cycle delay or arrest; YML053C is not an essential gene
YJL088W	ARG3	PCG	0.931722	No	No	2.68	0.746276	Ornithine carbamoyltransferase; also known as carbamoylphosphate:L-ornithine carbamoyltransferase; catalyzes the biosynthesis of the arginine precursor citrulline
YKL038W	RGT1	PCG	0.931713	Yes	Yes	0.7	0.86058	Glucose-responsive transcription factor; regulates expression of several glucose transporter (HXT) genes in response to glucose; binds to promoters and acts both as a transcriptional activator and repressor; RGT1 has a paralog, EDS1, that arose from the whole genome duplication
YGR073C	YGR073C	PCG	0.931701	No	No	0.7	0.575137	Dubious open reading frame; unlikely to encode a functional protein, based on available experimental and comparative sequence data; extensively overlaps essential SMD1 gene encoding a U6 snRNP protein
YGR075C	PRP38	PCG	0.931701	No	No	0.3	0.456964	Unique component of the U4/U6.U5 tri-snRNP particle; tri-snRNP is required for conformational changes which result in the catalytic activation of the spliceosome; dispensable for spliceosome assembly
YMR246W	FAA4	Antisens	0.931627	No	No	NA	-0.508771	Long chain fatty acyl-CoA synthetase; activates imported fatty acids with a preference for C12:0-C16:0 chain lengths; functions in long chain fatty acid import; important for survival during stationary phase; localized to lipid particles; involved in sphingolipid-to-glycerolipid metabolism; forms cytoplasmic foci upon DNA replication stress; FAA4 has a paralog, FAA1, that arose from the whole gen…
YHR159W	TDA11	Antisens	0.93161	No	No	NA	0.851375	Putative protein of unknown function; green fluorescent protein (GFP)-fusion protein localizes to the cytoplasm; potential Cdc28p substrate; null mutant is sensitive to expression of the top1-T722A allele
YKL027W	TCD2	Antisens	0.931432	No	No	NA	0.519698	tRNA threonylcarbamoyladenosine dehydratase; required for the ct6A tRNA base modification, where an adenosine at position 37 is modified to form a cyclized active ester with an oxazolone ring; localized to the mitochondrial outer membrane; TCD2 has a paralog, TCD1, that arose from the whole genome duplication
YER082C	UTP7	PCG	0.931396	No	No	1.29	0.171159	Nucleolar protein; component of the small subunit (SSU) processome containing the U3 snoRNA that is involved in processing of pre-18S rRNA
YHR151C	MTC6	PCG	0.931309	No	No	0.3	0.643232	Protein of unknown function; mtc6 is synthetically sick with cdc13-1
YMR278W	PRM15	Antisens	0.931245	No	No	NA	0.765038	Phosphoribomutase; catalyzes interconversion of ribose-1-phosphate and ribose-5-phosphate; has some phosphoglucomutase activity but primary activity in vivo is phosphoribomutase; contributes to ribose recycling in the pentose phosphate pathway; transcription induced in response to stress; green fluorescent protein (GFP)-fusion protein localizes to the cytoplasm and nucleus; non-essential
YNL284C	MRPL10	Antisens	0.931235	No	No	NA	0.581623	Mitochondrial ribosomal protein of the large subunit; appears as two protein spots (YmL10 and YmL18) on two-dimensional SDS gels
YIL055C	YIL055C	Antisens	0.93116	No	No	NA	1.06812	Putative protein of unknown function
YLL054C	YLL054C	PCG	0.93116	No	No	3.17	0.717679	Putative protein of unknown function with similarity to Pip2p; an oleate-specific transcriptional activator of peroxisome proliferation; YLL054C is not an essential gene
YOR271C	FSF1	PCG	0.931144	No	No	4.04	0.00976638	Putative protein; predicted to be an alpha-isopropylmalate carrier; belongs to the sideroblastic-associated protein family; non-tagged protein is detected in purified mitochondria; likely to play a role in iron homeostasis
YHR048W	YHK8	Antisens	0.931063	No	No	NA	0.924393	Presumed antiporter of the major facilitator superfamily; member of the 12-spanner drug:H(+) antiporter DHA1 family; expression of gene is up-regulated in cells exhibiting reduced susceptibility to azoles
YBL087C	RPL23A	PCG	0.931028	No	No	54.2	-0.868958	Ribosomal 60S subunit protein L23A; homologous to mammalian ribosomal protein L23 and bacterial L14; RPL23A has a paralog, RPL23B, that arose from the whole genome duplication
YEL006W	YEA6	Antisens	0.930994	No	No	NA	0.484475	Putative mitochondrial NAD+ transporter; member of the mitochondrial carrier subfamily (see also YIA6); has putative human ortholog; YEA6 has a paralog, YIA6, that arose from the whole genome duplication
YDR517W	GRH1	Antisens	0.930966	No	No	NA	0.322065	Acetylated cis-Golgi protein, involved in ER to Golgi transport; homolog of human GRASP65; forms a complex with the coiled-coil protein Bug1p; mutants are compromised for the fusion of ER-derived vesicles with Golgi membranes; protein abundance increases in response to DNA replication stress
YOR011W	AUS1	PCG	0.93094	No	No	0.2	0.55701	Plasma membrane sterol transporter of the ATP-binding cassette family; required, along with Pdr11p, for uptake of exogenous sterols and their incorporation into the plasma membrane; activity is stimulated by phosphatidylserine; sterol uptake is required for anaerobic growth because sterol biosynthesis requires oxygen; AUS1 has a paralog, PDR11, that arose from the whole genome duplication
YIL105C	SLM1	PCG	0.930928	No	No	1.05	0.793295	Phosphoinositide PI4,5P(2) binding protein, forms a complex with Slm2p; acts downstream of Mss4p in a pathway regulating actin cytoskeleton organization in response to stress; phosphorylated by the TORC2 complex; protein abundance increases in response to DNA replication stress; SLM1 has a paralog, SLM2, that arose from the whole genome duplication
YPR175W	DPB2	Antisens	0.930919	No	No	NA	0.629556	Second largest subunit of DNA polymerase II (DNA polymerase epsilon); required for maintenance of fidelity of chromosomal replication; essential motif in C-terminus is required for formation of the four-subunit Pol epsilon; expression peaks at the G1/S phase boundary; Cdc28p substrate
chrVI_25338_28092	chrVI_25338_28092	Intergenic	0.930898	No	No	NA	NA	NA
YHR001W	OSH7	Antisens	0.930754	No	No	NA	0.641278	Oxysterol-binding protein; part of family with seven members in S. cerevisiae; family members have overlapping, redundant functions in sterol metabolism and collectively perform a function essential for viability; OSH7 has a paralog, OSH6, that arose from the whole genome duplication
chrXV_504469_505655	chrXV_504469_505655	Intergenic	0.930643	No	No	NA	NA	NA
YNL115C	YNL115C	PCG	0.930642	No	Yes	0.6	0.961673	Putative protein of unknown function; green fluorescent protein (GFP)-fusion protein localizes to mitochondria; YNL115C is not an essential gene
YDL114W	YDL114W	Antisens	0.930597	No	No	NA	1.00758	Putative short-chain dehydrogenase/reductase; YDL114W is not an essential gene
YHR204W	MNL1	PCG	0.930566	No	No	0.4	0.398072	Alpha-1,2-specific exomannosidase of the endoplasmic reticulum; in complex with Pdi1p, generates a Man7GlcNac2 oligosaccharide signal on glycoproteins destined for ubiquitin-proteasome degradation
YLR116W	MSL5	Antisens	0.930555	No	No	NA	0.367116	Component of commitment complex; which defines first step in splicing pathway; essential protein that interacts with Mud2p and Prp40p, forming a bridge between the intron ends; also involved in nuclear retention of pre-mRNA; relocalizes to the cytosol in response to hypoxia
YNL330C	RPD3	PCG	0.930534	No	No	1.1	0.606309	Histone deacetylase, component of both the Rpd3S and Rpd3L complexes; regulates transcription, silencing, autophagy and other processes by influencing chromatin remodeling; forms at least two different complexes which have distinct functions and members; Rpd3(L) recruitment to the subtelomeric region is regulated by interaction with the arginine methyltransferase, Hmt1p
YGR169C-A	YGR169C-A	PCG	0.930486	No	No	NA	0.436228	Putative protein of unknown function; YGR169C-A has a paralog, YJR005C-A, that arose from the whole genome duplication
YIL163C	YIL163C	PCG	0.930471	No	No	1.21	0.520513	Protein of unknown function; mRNA identified as translated by ribosome profiling data
YDL082W	RPL13A	PCG	0.930428	No	No	25.9	-0.589008	Ribosomal 60S subunit protein L13A; not essential for viability; homologous to mammalian ribosomal protein L13, no bacterial homolog; RPL13A has a paralog, RPL13B, that arose from the whole genome duplication
YJL091C	GWT1	Antisens	0.930358	No	No	NA	0.866645	Protein involved in the inositol acylation of GlcN-PI; the inositol acylation of glucosaminyl phosphatidylinositol (GlcN-PI) forms glucosaminyl(acyl)phosphatidylinositol (GlcN(acyl)PI), an intermediate in the biosynthesis of glycosylphosphatidylinositol (GPI) anchors
YHR120W	MSH1	PCG	0.930332	No	No	0.3	0.565458	DNA-binding protein of the mitochondria; involved in repair of mitochondrial DNA; has ATPase activity and binds to DNA mismatches; has homology to E. coli MutS; transcription is induced during meiosis
YNR052C	POP2	PCG	0.930316	No	No	1.83	0.516615	RNase of the DEDD superfamily; subunit of the Ccr4-Not complex that mediates 3' to 5' mRNA deadenylation
YNL241C	ZWF1	Antisens	0.930302	No	No	NA	0.485784	Glucose-6-phosphate dehydrogenase (G6PD); catalyzes the first step of the pentose phosphate pathway; involved in adapting to oxidatve stress; homolog of the human G6PD which is deficient in patients with hemolytic anemia; protein abundance increases in response to DNA replication stress
YDR256C	CTA1	Antisens	0.930296	No	No	NA	0.811662	Catalase A; breaks down hydrogen peroxide in the peroxisomal matrix formed by acyl-CoA oxidase (Pox1p) during fatty acid beta-oxidation
YMR047C	NUP116	PCG	0.930233	No	No	1.67	0.361745	FG-nucleoporin component of central core of the nuclear pore complex; contributes directly to nucleocytoplasmic transport and maintenance of the nuclear pore complex (NPC) permeability barrier; forms a stable association with Nup82p, Gle2p and two other FG-nucleoporins (Nsp1p and Nup159p); NUP116 has a paralog, NUP100, that arose from the whole genome duplication
YNR039C	ZRG17	Antisens	0.930218	No	No	NA	0.775239	Endoplasmic reticulum zinc transporter; part of a heterodimeric transporter with Msc2p that transfers zinc from the cytosol to the ER lumen; member of the cation diffusion facilitator family of efflux pumps; zinc-regulated directly through Zap1p; transcription induced under conditions of zinc deficiency
YLR039C	RIC1	Antisens	0.930195	No	No	NA	0.569623	Protein involved in retrograde transport to the cis-Golgi network; forms heterodimer with Rgp1p that acts as a GTP exchange factor for Ypt6p; involved in transcription of rRNA and ribosomal protein genes
YKL181W	PRS1	PCG	0.930181	No	No	7.81	-0.123634	5-phospho-ribosyl-1(alpha)-pyrophosphate synthetase; synthesizes PRPP, which is required for nucleotide, histidine, and tryptophan biosynthesis; one of five related enzymes, which are active as heteromultimeric complexes
YEL070W	DSF1	Antisens	0.930171	No	No	NA	0.735826	Putative mannitol dehydrogenase; deletion suppressor of mpt5 mutation; DSF1 has a paralog, YNR073C, that arose from a segmental duplication
YNR073C	YNR073C	Antisens	0.930171	No	No	NA	0.674175	Putative mannitol dehydrogenase; YNR073C has a paralog, DSF1, that arose from a segmental duplication
YCR084C	TUP1	PCG	0.930134	No	Yes	2.02	0.103811	General repressor of transcription; forms complex with Cyc8p, involved in the establishment of repressive chromatin structure through interactions with histones H3 and H4, appears to enhance expression of some genes
YLR135W	SLX4	PCG	0.930109	No	No	0.3	0.892259	Endonuclease involved in processing DNA; acts during recombination and repair; promotes template switching during break-induced replication (BIR), causing non-reciprocal translocations (NRTs); cleaves branched structures in a complex with Slx1p; involved interstrand cross-link repair and in Rad1p/Rad10p-dependent removal of 3'-nonhomologous tails during DSBR via single-strand annealing; relative …
YDR293C	SSD1	PCG	0.930102	No	Yes	0.8	0.948477	Translational repressor with a role in polar growth and wall integrity; regulated by Cbk1p phosphorylation to effect bud-specific translational control and localization of specific mRNAs; interacts with TOR pathway components; contains a functional N-terminal nuclear localization sequence and nucleocytoplasmic shuttling appears to be critical to Ssd1p function
YDR293C	SSD1	Antisens	0.930045	No	No	NA	0.948477	Translational repressor with a role in polar growth and wall integrity; regulated by Cbk1p phosphorylation to effect bud-specific translational control and localization of specific mRNAs; interacts with TOR pathway components; contains a functional N-terminal nuclear localization sequence and nucleocytoplasmic shuttling appears to be critical to Ssd1p function
YDR481C	PHO8	PCG	0.930005	No	No	1.7	-0.484816	Repressible vacuolar alkaline phosphatase; regulated by levels of Pi and by Pho4p, Pho9p, Pho80p, Pho81p and Pho85p; dephosphorylates phosphotyrosyl peptides; contributes to NAD+ metabolism by producing nicotinamide riboside from NMN
YLL016W	SDC25	Antisens	0.930004	No	No	NA	0.971765	Non-essential Ras guanine nucleotide exchange factor (GEF); localized to the membrane; expressed in poor nutrient conditions and on nonfermentable carbon sources; contains a stop codon in S288C, full-length gene includes YLL017W; SDC25 has a paralog, CDC25, that arose from the whole genome duplication
YHR151C	MTC6	Antisens	0.929951	No	No	NA	0.643232	Protein of unknown function; mtc6 is synthetically sick with cdc13-1
YBR203W	COS111	PCG	0.929937	No	Yes	0.3	1.05956	Protein required for antifungal drug ciclopirox olamine resistance; not related to the subtelomerically-encoded COS family; the authentic, non-tagged protein is detected in highly purified mitochondria in high-throughput studies
YOR367W	SCP1	PCG	0.929918	No	No	0.7	0.72878	Component of yeast cortical actin cytoskeleton; binds and cross links actin filaments; originally identified by its homology to calponin (contains a calponin-like repeat) but the Scp1p domain structure is more similar to transgelin
YHR165W-A	YHR165W-A	PCG	0.929872	No	No	NA	0.290638	Dubious open reading frame; unlikely to encode a functional protein, based on available experimental and comparative sequence data; completely overlaps ORF PRP8/YHR165C
YOR284W	HUA2	PCG	0.929863	No	No	0.3	0.932958	Cytoplasmic protein of unknown function; computational analysis of large-scale protein-protein interaction data suggests a possible role in actin patch assembly
YGL130W	CEG1	PCG	0.929825	No	Yes	1.1	0.686489	Guanylyltransferase involved in mRNA 5' capping; subunit of the mRNA capping enzyme, which is a heterotetramer composed of two molecules of Ceg1p and a homodimer of Cet1p, the mRNA 5?-triphosphatase subunit; nuclear import of Ceg1p requires interaction with Cet1p; mammalian capping enzyme is a single bifunctional polypeptide
YER016W	BIM1	Antisens	0.929811	No	No	NA	0.399975	Microtubule plus end-tracking protein; together with Kar9p makes up the cortical microtubule capture site and delays the exit from mitosis when the spindle is oriented abnormally
YML111W	BUL2	PCG	0.929788	No	No	0.4	0.657517	Component of the Rsp5p E3-ubiquitin ligase complex; involved in intracellular amino acid permease sorting, functions in heat shock element mediated gene expression, essential for growth in stress conditions; BUL2 has a paralog, BUL1, that arose from the whole genome duplication
YLR101C	YLR101C	PCG	0.92977	No	No	0.2	0.452434	Dubious open reading frame; unlikely to encode a functional protein, based on available experimental and comparative sequence data; partially overlaps the verified, essential ORF ERG27/YLR100W
YLR102C	APC9	PCG	0.92977	No	No	0.2	0.711647	Subunit of the Anaphase-Promoting Complex/Cyclosome (APC/C); APC/C is a ubiquitin-protein ligase required for degradation of anaphase inhibitors, including mitotic cyclins, during the metaphase/anaphase transition
YNL082W	PMS1	PCG	0.929763	No	No	0.3	0.764116	ATP-binding protein required for mismatch repair; required for both mitosis and meiosis; functions as a heterodimer with Mlh1p; binds double- and single-stranded DNA via its N-terminal domain, similar to E. coli MutL
YCR014C	POL4	PCG	0.929681	No	No	0.4	0.816345	DNA polymerase IV; undergoes pair-wise interactions with Dnl4p-Lif1p and Rad27p to mediate repair of DNA double-strand breaks by non-homologous end joining (NHEJ); homologous to mammalian DNA polymerase beta
YHR099W	TRA1	Antisens	0.929622	No	No	NA	0.386189	Subunit of SAGA and NuA4 histone acetyltransferase complexes; interacts with acidic activators (e.g., Gal4p) which leads to transcription activation; similar to human TRRAP, which is a cofactor for c-Myc mediated oncogenic transformation
YML016C	PPZ1	Antisens	0.929538	No	No	NA	0.896761	Serine/threonine protein phosphatase Z, isoform of Ppz2p; involved in regulation of potassium transport, which affects osmotic stability, cell cycle progression, and halotolerance; PPZ1 has a paralog, PPZ2, that arose from the whole genome duplication
YGR083C	GCD2	Antisens	0.929537	No	No	NA	0.182855	Delta subunit of the translation initiation factor eIF2B; the guanine-nucleotide exchange factor for eIF2; activity subsequently regulated by phosphorylated eIF2; first identified as a negative regulator of GCN4 expression
YDR081C	PDC2	Antisens	0.929516	No	No	NA	0.794347	Transcription factor for thiamine-regulated genes; required for expression of the two isoforms of pyruvate decarboxylase (PDC1 and PDC5) along with thiamine biosynthetic genes; binds a DNA sequence in the PDC5 promoter; mutant fails to grow on 2% glucose and thus is scored as inviable under standard conditions
YJR121W	ATP2	PCG	0.929471	No	No	4.3	0.377229	Beta subunit of the F1 sector of mitochondrial F1F0 ATP synthase; which is a large, evolutionarily conserved enzyme complex required for ATP synthesis; F1 translationally regulates ATP6 and ATP8 expression to achieve a balanced output of ATP synthase genes encoded in nucleus and mitochondria; phosphorylated
chrVIII_266980_267400	chrVIII_266980_267400	Intergenic	0.92945	No	No	NA	NA	NA
YHR068W	DYS1	Antisens	0.929395	No	No	NA	-0.492685	Deoxyhypusine synthase; catalyzes formation of deoxyhypusine, the first step in hypusine biosynthesis; triggers posttranslational hypusination of translation elongation factor eIF-5A and regulates its intracellular levels; tetrameric
YKL017C	HCS1	Antisens	0.929296	No	No	NA	0.870182	Hexameric DNA polymerase alpha-associated DNA helicase A; involved in lagging strand DNA synthesis; contains single-stranded DNA stimulated ATPase and dATPase activities; replication protein A stimulates helicase and ATPase activities
YBR256C	RIB5	Antisens	0.92929	No	No	NA	0.644293	Riboflavin synthase; catalyzes the last step of the riboflavin biosynthesis pathway
YDR051C	DET1	Antisens	0.929238	No	No	NA	0.64642	Acid phosphatase; involved in the non-vesicular transport of sterols in both directions between the endoplasmic reticulum and plasma membrane; deletion confers sensitivity to nickel
YEL043W	YEL043W	PCG	0.929228	No	No	1.24	0.464686	Predicted cytoskeleton protein involved in intracellular signaling; based on quantitative analysis of protein-protein interaction maps; may interact with ribosomes, based on co-purification studies; contains fibronectin type III domain fold
YIL051C	MMF1	PCG	0.929139	No	No	28	-0.291756	Mitochondrial protein required for transamination of isoleucine; but not of valine or leucine; may regulate specificity of branched-chain transaminases Bat1p and Bat2p; induction of expression in response to stress is mediated by a Hog1p-regulated antisense RNA and gene looping; interacts genetically with mitochondrial ribosomal protein genes; MMF1 has a paralog, HMF1, that arose from the whole g…
YMR280C	CAT8	PCG	0.9291	No	No	1.49	0.822861	Zinc cluster transcriptional activator; necessary for derepression of a variety of genes under non-fermentative growth conditions, active after diauxic shift, binds carbon source responsive elements; relative distribution to the nucleus increases upon DNA replication stress
YFR029W	PTR3	Antisens	0.929	No	No	NA	1.22785	Component of the SPS plasma membrane amino acid sensor system; senses external amino acid concentration and transmits intracellular signals that result in regulation of expression of amino acid permease genes; other members are Ssy1p, Ptr3p, and Ssy5p
YDR473C	PRP3	PCG	0.928938	No	No	0.4	0.717338	Splicing factor; component of the U4/U6-U5 snRNP complex
YMR229C	RRP5	PCG	0.928928	No	Yes	2.89	-0.332722	RNA binding protein involved in synthesis of both 18S and 5.8S rRNAs; component of both the ribosomal small subunit (SSU) processosome and the 90S preribosome; has binding preference for single stranded tracts of U's; relocalizes from nucleolus to nucleus upon DNA replication stress
YPL090C	RPS6A	PCG	0.9289	No	No	27.2	-0.675161	Protein component of the small (40S) ribosomal subunit; homologous to mammalian ribosomal protein S6, no bacterial homolog; RPS6A has a paralog, RPS6B, that arose from the whole genome duplication
YJR139C	HOM6	Antisens	0.928895	No	No	NA	-0.190405	Homoserine dehydrogenase (L-homoserine:NADP oxidoreductase); dimeric enzyme that catalyzes the third step in the common pathway for methionine and threonine biosynthesis; enzyme has nucleotide-binding, dimerization and catalytic regions
YBL080C	PET112	Antisens	0.928882	No	No	NA	0.658306	Subunit of the trimeric GatFAB AmidoTransferase(AdT) complex; involved in the formation of Q-tRNAQ; mutation is functionally complemented by the bacterial GatB ortholog
YOL052C	SPE2	PCG	0.928855	No	No	1	0.126843	S-adenosylmethionine decarboxylase; required for the biosynthesis of spermidine and spermine; cells lacking Spe2p require spermine or spermidine for growth in the presence of oxygen but not when grown anaerobically
YNR056C	BIO5	PCG	0.928816	No	No	1.49	1.07799	Putative transmembrane protein involved in the biotin biosynthesis; responsible for uptake of 7-keto 8-aminopelargonic acid; BIO5 is in a cluster of 3 genes (BIO3, BIO4, and BIO5) that mediate biotin synthesis
YGL179C	TOS3	Antisens	0.928814	No	No	NA	1.06431	Protein kinase; related to and functionally redundant with Elm1p and Sak1p for the phosphorylation and activation of Snf1p; functionally orthologous to LKB1, a mammalian kinase associated with Peutz-Jeghers cancer-susceptibility syndrome; TOS3 has a paralog, SAK1, that arose from the whole genome duplication
YKL096W	CWP1	PCG	0.928807	No	No	4.3	0.476167	Cell wall mannoprotein that localizes to birth scars of daughter cells; linked to a beta-1,3- and beta-1,6-glucan heteropolymer through a phosphodiester bond; required for propionic acid resistance
YMR247C	RKR1	Antisens	0.92868	No	No	NA	0.586539	RING domain E3 ubiquitin ligase; involved in ubiquitin-mediated degradation of non-stop proteins; component of ribosome-bound RQC (ribosome quality control) complex required for degradation of polypeptides arising from stalled translation; degrades products of mRNAs lacking a termination codon regardless of a poly(A) tail; functional connections to chromatin modification; homolog of mouse Listeri…
YML100W	TSL1	PCG	0.92868	No	No	1.3	0.912794	Large subunit of trehalose 6-phosphate synthase/phosphatase complex; Tps1p-Tps2p complex converts uridine-5'-diphosphoglucose and glucose 6-phosphate to trehalose; contributes to survival to acute lethal heat stress; mutant has aneuploidy tolerance; protein abundance increases in response to DNA replication stress; TSL1 has a paralog, TPS3, that arose from the whole genome duplication
YDR527W	RBA50	Antisens	0.928662	No	No	NA	0.449495	Protein involved in transcription; interacts with RNA polymerase II subunits Rpb2p, Rpb3, and Rpb11p; has similarity to human RPAP1
YLR438W	CAR2	Antisens	0.928646	No	No	NA	-0.397257	L-ornithine transaminase (OTAse); catalyzes the second step of arginine degradation, expression is dually-regulated by allophanate induction and a specific arginine induction process; not nitrogen catabolite repression sensitive; protein abundance increases in response to DNA replication stress
YBL042C	FUI1	Antisens	0.928617	No	No	NA	-0.0695161	High affinity uridine permease, localizes to the plasma membrane; also mediates low but significant transport of the cytotoxic nucleoside analog 5-fluorouridine; not involved in uracil transport; relative distribution to the vacuole increases upon DNA replication stress
YNL210W	MER1	Antisens	0.928591	No	No	NA	0.697181	mRNA-binding protein required for meiosis-specific mRNA splicing; required for chromosome pairing and meiotic recombination; Mer1p regulon embraces four essential meiotic pre-mRNAs: REC107, HFM1, AMA1 and SPO22
YGR173W	RBG2	Antisens	0.928499	No	No	NA	0.385601	Protein with a role in translation; forms a complex with Gir2p; has similarity to mammalian developmentally regulated GTP-binding protein
YMR182C	RGM1	PCG	0.928494	No	No	3.17	1.02644	Putative zinc finger DNA binding transcription factor; contains two N-terminal C2H2 zinc fingers and C-terminal proline rich domain; overproduction impairs cell growth and induces expression of genes involved in monosaccharide catabolism and aldehyde metabolism; regulates expression of of Y' telomeric elements and subtelomeric COS genes; relocalizes to the cytosol in response to hypoxia; RGM1 has…
YGL126W	SCS3	PCG	0.928467	No	No	2.65	0.503015	Protein required for inositol prototrophy; required for normal ER membrane biosynthesis; ortholog of the FIT family of proteins involved in triglyceride droplet biosynthesis and homologous to human FIT2; disputed role in the synthesis of inositol phospholipids from inositol
YMR237W	BCH1	Antisens	0.928464	No	No	NA	0.222314	Member of the ChAPs family (Chs5p-Arf1p-binding proteins); members include Bch1p, Bch2p, Bud7p, and Chs6p; ChAPs family proteins form the exomer complex with Chs5p to mediate export of specific cargo proteins from the Golgi to the plasma membrane; may interact with ribosomes; protein abundance increases and forms cytoplasmic foci in response to DNA replication stress; BCH1 has a paralog, BUD7, th…
YER002W	NOP16	PCG	0.928367	No	No	3.06	0.376753	Constituent of 66S pre-ribosomal particles; involved in 60S ribosomal subunit biogenesis
YGL095C	VPS45	Antisens	0.928367	No	No	NA	0.762165	Protein of the Sec1p/Munc-18 family; essential for vacuolar protein sorting; required for the function of Pep12p and the early endosome/late Golgi SNARE Tlg2p; essential for fusion of Golgi-derived vesicles with the prevacuolar compartment
chrIV_599825_600650	chrIV_599825_600650	Intergenic	0.928362	No	No	NA	NA	NA
chrX_339404_339642	chrX_339404_339642	Intergenic	0.928361	No	No	NA	NA	NA
YIL131C	FKH1	Antisens	0.928356	No	No	NA	0.458908	Forkhead family transcription factor; minor role in expression of G2/M phase genes; negatively regulates transcription elongation; positive role in chromatin silencing at HML, HMR; facilitates clustering and activation of early-firing replication origins; binds to recombination enhancer near HML, regulates donor preference during mating-type switching; relocalizes to cytosol in response to hypoxi…
YKR048C	NAP1	PCG	0.928344	No	No	3.49	0.183368	Histone chaperone; involved in histone exchange by removing and replacing histone H2A-H2B dimers or histone variant dimers from assembled nucleosomes; involved in the transport of H2A and H2B histones to the nucleus; required for the regulation of microtubule dynamics during mitosis; interacts with mitotic cyclin Clb2p; controls bud morphogenesis; phosphorylated by CK2; protein abundance increase…
YGR208W	SER2	Antisens	0.928315	No	No	NA	-0.0686603	Phosphoserine phosphatase of the phosphoglycerate pathway; involved in serine and glycine biosynthesis, expression is regulated by the available nitrogen source
YHR213W	YHR213W	PCG	0.928311	No	No	0.1	NA	Pseudogenic fragment with similarity to flocculins; YHR213W has a paralog, YAR062W, that arose from a segmental duplication
YPR110C	RPC40	Antisens	0.928297	No	No	NA	-0.0660008	RNA polymerase subunit AC40; common to RNA polymerase I and III
chrXII_48801_49797	chrXII_48801_49797	Intergenic	0.928257	No	No	NA	NA	NA
YER105C	NUP157	PCG	0.928227	No	No	0.8	0.267974	Subunit of the inner ring of the nuclear pore complex (NPC); contributes to NPC assembly and tethering of DNA to the nuclear periphery; both Nup170p and NUP157p are similar to human Nup155p; NUP157 has a paralog, NUP170, that arose from the whole genome duplication
YER168C	CCA1	Antisens	0.928204	No	No	NA	0.572642	ATP (CTP):tRNA-specific tRNA nucleotidyltransferase; different forms targeted to the nucleus, cytosol, and mitochondrion are generated via the use of multiple transcriptional and translational start sites
YCR081W	SRB8	PCG	0.928197	No	No	0.2	0.740752	Subunit of the RNA polymerase II mediator complex; associates with core polymerase subunits to form the RNA polymerase II holoenzyme; essential for transcriptional regulation; involved in glucose repression
YBR108W	AIM3	Antisens	0.928081	No	No	NA	0.916999	Protein that inhibits barbed-end actin filament elongation; interacts with Rvs167p; null mutant is viable and displays elevated frequency of mitochondrial genome loss
YDR296W	MHR1	PCG	0.928053	No	No	0.8	0.516921	Protein involved in homologous recombination in mitochondria; required for recombination-dependent mtDNA partitioning; involved in stimulation of mitochondrial DNA replication in response to oxidative stress
YCL008C	STP22	Antisens	0.927999	No	No	NA	0.551992	Component of the ESCRT-I complex; ESCRT-I is involved in ubiquitin-dependent sorting of proteins into the endosome; homologous to the mouse and human Tsg101 tumor susceptibility gene; mutants exhibit a Class E Vps phenotype
YCL009C	ILV6	Antisens	0.927999	No	No	NA	-0.324071	Regulatory subunit of acetolactate synthase; acetolactate synthase catalyzes the first step of branched-chain amino acid biosynthesis; enhances activity of the Ilv2p catalytic subunit, localizes to mitochondria
YDR344C	YDR344C	Antisens	0.927962	No	No	NA	0.446673	Dubious open reading frame; unlikely to encode a functional protein, based on available experimental and comparative sequence data
YOL081W	IRA2	Antisens	0.927935	No	No	NA	0.569594	GTPase-activating protein; negatively regulates RAS by converting it from the GTP- to the GDP-bound inactive form, required for reducing cAMP levels under nutrient limiting conditions; similar to human neurofibromin; IRA2 has a paralog, IRA1, that arose from the whole genome duplication
YLL040C	VPS13	Antisens	0.927933	No	No	NA	0.571839	Protein involved in prospore membrane morphogenesis; heterooligomeric or homooligomeric complex; peripherally associated with membranes; involved in sporulation, vacuolar protein sorting, prospore membrane formation during sporulatoin, and protein-Golgi retention; homologous to human CHAC and COH1 which are involved in chorea acanthocytosis and Cohen syndrome, respectively
YPL217C	BMS1	PCG	0.927922	No	Yes	1.49	0.188187	GTPase required for ribosomal subunit synthesis and rRNA processing; required for synthesis of 40S ribosomal subunits and for processing the 35S pre-rRNA at sites A0, A1, and A2; interacts with Rcl1p, which stimulates its GTPase and U3 snoRNA binding activities; has similarity to Tsr1p
YBL066C	SEF1	PCG	0.927882	No	No	0.2	0.818999	Putative transcription factor; has homolog in Kluyveromyces lactis
YCR057C	PWP2	PCG	0.92783	No	No	1.24	0.0450412	Conserved 90S pre-ribosomal component; essential for proper endonucleolytic cleavage of the 35 S rRNA precursor at A0, A1, and A2 sites; contains eight WD-repeats; PWP2 deletion leads to defects in cell cycle and bud morphogenesis
YGR248W	SOL4	Antisens	0.927824	No	No	NA	1.1224	6-phosphogluconolactonase; protein abundance increases in response to DNA replication stress; SOL4 has a paralog, SOL3, that arose from the whole genome duplication
YMR176W	ECM5	Antisens	0.92781	No	No	NA	0.853358	Subunit of the Snt2C complex; physically associates with Snt2p and Rpd3p; along with Snt2p, recruits Rpd3p to a small number of promoters; also colocalizes with Snt2p, independently of Rpd3p, to promoters of stress response genes in response to oxidative stress; contains ATP/GTP-binding site motif A; null mutant exhibits increased cellular volume, large drooping buds with elongated necks; relativ…
YOR374W	ALD4	PCG	0.927808	No	No	1.5	0.403968	Mitochondrial aldehyde dehydrogenase; required for growth on ethanol and conversion of acetaldehyde to acetate; phosphorylated; activity is K+ dependent; utilizes NADP+ or NAD+ equally as coenzymes; expression is glucose repressed; can substitute for cytosolic NADP-dependent aldehyde dehydrogenase when directed to the cytosol
YGR196C	FYV8	PCG	0.927721	No	No	0.3	0.578257	Protein of unknown function; required for survival upon exposure to K1 killer toxin
RPR1	RPR1	ncRNA	0.927706	No	No	NA	0.193131	RNA component of nuclear RNase P; nuclear RNase P cleaves tRNA precursors to generate mature 5' ends and facilitates turnover of nuclear RNAs; may be responsible for recognition of substrate tRNAs
chrXI_201555_202148	chrXI_201555_202148	Intergenic	0.927676	No	No	NA	NA	NA
YIR034C	LYS1	Antisens	0.927626	No	No	NA	0.694739	Saccharopine dehydrogenase (NAD+, L-lysine-forming); catalyzes the conversion of saccharopine to L-lysine, which is the final step in the lysine biosynthesis pathway; also has mRNA binding activity
YMR222C	FSH2	PCG	0.927608	No	No	0.7	0.538998	Putative serine hydrolase that localizes to the cytoplasm; sequence is similar to S. cerevisiae Fsh1p and Fsh3p and the human candidate tumor suppressor OVCA2
YEL029C	BUD16	PCG	0.927601	No	No	0.3	0.620999	Putative pyridoxal kinase; a key enzyme involved in pyridoxal 5'-phosphate synthesis, the active form of vitamin B6; required for genome integrity; involved in bud-site selection; similarity to yeast BUD17 and human pyridoxal kinase (PDXK)
YIR004W	DJP1	PCG	0.927582	No	No	1.3	0.662485	Cytosolic J-domain-containing protein; required for peroxisomal protein import and involved in peroxisome assembly, homologous to E. coli DnaJ
YIL031W	ULP2	Antisens	0.927577	No	No	NA	0.698458	Peptidase that deconjugates Smt3/SUMO-1 peptides from proteins; plays a role in chromosome cohesion at centromeric regions and recovery from checkpoint arrest induced by DNA damage or DNA replication defects; potential Cdc28p substrate
YER122C	GLO3	PCG	0.927569	No	No	2.6	0.322933	ADP-ribosylation factor GTPase activating protein (ARF GAP); involved in ER-Golgi transport; shares functional similarity with Gcs1p
YMR196W	YMR196W	PCG	0.92756	No	No	0.2	1.04032	Putative protein of unknown function; green fluorescent protein (GFP)-fusion protein localizes to the cytoplasm; YMR196W is not an essential gene
YDL136Wi	RPL35Bi	PCG (intron)	0.927507	No	No	NA	1.07982	NA
YPL162C	YPL162C	Antisens	0.927366	No	No	NA	0.793031	Putative protein of unknown function; green fluorescent protein (GFP)-fusion protein localizes to the membrane of vacuole with cell cycle-correlated morphology
chrIV_9896_11517	chrIV_9896_11517	Intergenic	0.92733	No	No	NA	NA	NA
YLRWdelta6	YLRWdelta6	long_terminal_repeat	0.927329	No	No	NA	NA	Ty1 LTR
YDL100C	GET3	Antisens	0.927197	No	No	NA	0.0383704	Guanine nucleotide exchange factor for Gpa1p; amplifies G protein signaling; subunit of the GET complex, which is involved in Golgi to ER trafficking and insertion of proteins into the ER membrane; has low-level ATPase activity; protein abundance increases in response to DNA replication stress
YPL016W	SWI1	Antisens	0.927194	No	No	NA	0.756417	Subunit of the SWI/SNF chromatin remodeling complex; regulates transcription by remodeling chromatin; required for transcription of many genes, including ADH1, ADH2, GAL1, HO, INO1 and SUC2; can form the prion [SWI+]; human homolog ARID1A is a candidate tumor suppressor gene in breast cancer
YNL209W	SSB2	Antisens	0.927085	No	No	NA	-0.747354	Cytoplasmic ATPase that is a ribosome-associated molecular chaperone; functions with J-protein partner Zuo1p; may be involved in the folding of newly-synthesized polypeptide chains; member of the HSP70 family; SSB2 has a paralog, SSB1, that arose from the whole genome duplication
YBR140C	IRA1	Antisens	0.927078	No	No	NA	0.617352	GTPase-activating protein; negatively regulates RAS by converting it from the GTP- to the GDP-bound inactive form, required for reducing cAMP levels under nutrient limiting conditions, mediates membrane association of adenylate cyclase; IRA1 has a paralog, IRA2, that arose from the whole genome duplication
YPR088C	SRP54	PCG	0.927023	No	No	2.49	0.048174	Signal recognition particle (SRP) subunit (homolog of mammalian SRP54); contains the signal sequence-binding activity of SRP, interacts with the SRP RNA, and mediates binding of SRP to signal receptor; contains GTPase domain
YDL048C	STP4	Antisens	0.926994	No	No	NA	1.47032	Protein containing a Kruppel-type zinc-finger domain; similar to Stp1p, Stp2p; predicted transcription factor; relative distribution to the nucleus increases upon DNA replication stress; STP4 has a paralog, STP3, that arose from the whole genome duplication
YFR005C	SAD1	Antisens	0.926967	No	No	NA	0.590631	Conserved zinc-finger domain protein involved in pre-mRNA splicing; required for assembly of U4 snRNA into the U4/U6 particle
YLL002W	RTT109	Antisens	0.926949	No	No	NA	0.709507	Histone acetyltransferase; critical for cell survival in the presence of DNA damage during S phase; prevents hyper-amplification of rDNA; acetylates H3-K56 and H3-K9; involved in non-homologous end joining and in regulation of Ty1 transposition; interacts physically with Vps75p
YFL040W	YFL040W	PCG	0.926888	No	No	1.21	0.77175	Putative transporter; member of the sugar porter family; YFL040W is not an essential gene
YDR304C	CPR5	PCG	0.926877	No	No	8.62	0.48064	Peptidyl-prolyl cis-trans isomerase (cyclophilin) of the ER; catalyzes the cis-trans isomerization of peptide bonds N-terminal to proline residues; transcriptionally induced in response to unfolded proteins in the ER; CPR5 has a paralog, CPR2, that arose from the whole genome duplication
YOL130W	ALR1	PCG	0.92682	No	No	1.39	0.345845	Plasma membrane Mg(2+) transporter; expression and turnover are regulated by Mg(2+) concentration; overexpression confers increased tolerance to Al(3+) and Ga(3+) ions
YFR053C	HXK1	PCG	0.926787	No	Yes	3.7	0.511995	Hexokinase isoenzyme 1; a cytosolic protein that catalyzes phosphorylation of glucose during glucose metabolism; expression is highest during growth on non-glucose carbon sources; glucose-induced repression involves hexokinase Hxk2p; HXK1 has a paralog, HXK2, that arose from the whole genome duplication
YDR147W	EKI1	PCG	0.926767	No	Yes	0.4	0.784856	Ethanolamine kinase; primarily responsible for phosphatidylethanolamine synthesis via the CDP-ethanolamine pathway; exhibits some choline kinase activity, thus contributing to phosphatidylcholine synthesis via the CDP-choline pathway; EKI1 has a paralog, CKI1, that arose from the whole genome duplication
YDL021W	GPM2	PCG	0.926719	No	No	0.1	0.73616	Homolog of Gpm1p phosphoglycerate mutase; converts 3-phosphoglycerate to 2-phosphoglycerate in glycolysis; may be non-functional; GPM2 has a paralog, GPM3, that arose from the whole genome duplication
YOR161W-B	YOR161W-B	PCG	0.92666	No	No	NA	1.32194	Protein of unknown function; identified by gene-trapping, microarray-based expression analysis, and genome-wide homology searching
YHR112C	YHR112C	Antisens	0.926632	No	No	NA	0.663233	Protein of unknown function; localizes to the cytoplasm and nucleus; overexpression affects protein trafficking through the endocytic pathway
YLR087C	CSF1	PCG	0.92663	No	No	0.3	0.742723	Protein required for fermentation at low temperature; plays a role in the maturation of secretory proteins; the authentic, non-tagged protein is detected in highly purified mitochondria in high-throughput studies
YMR190C	SGS1	Antisens	0.92658	No	No	NA	0.722215	RecQ family nucleolar DNA helicase; role in genome integrity maintenance; regulates chromosome synapsis and meiotic joint molecule/crossover formation; stimulates DNA catenation/decatenation activity of Top3p; potential repressor of a subset of rapamycin responsive genes; rapidly lost in response to rapamycin in Rrd1p-dependent manner; similar to human BLM and WRN proteins implicated in Bloom and…
YLR265C	NEJ1	PCG	0.926513	No	No	0.6	0.717697	Protein involved in regulation of nonhomologous end joining; interacts with DNA ligase IV components Dnl4p and Lif1p; repressed by MAT heterozygosity; regulates cellular distribution of Lif1p
YMR024W	MRPL3	PCG	0.926505	No	No	0.8	0.520484	Mitochondrial ribosomal protein of the large subunit; located in close proximity to the polypeptide exit channel of the ribosome; mutations in human homolog MRPL44 cause childhood cardiomyopathy; human MRPL44 deficiency results in inefficient assembly of the mitochondrial ribosome, and in tissue-specific respiratory chain deficiency, manifesting as either Complex I+Complex IV or Complex IV defici…
YDR337W	MRPS28	PCG	0.926452	No	No	1.13	0.57008	Mitochondrial ribosomal protein of the small subunit
YDL138W	RGT2	Antisens	0.926445	No	No	NA	0.803149	Plasma membrane high glucose sensor that regulates glucose transport; contains 12 predicted transmembrane segments and a long C-terminal tail required for induction of hexose transporters; RGT2 has a paralog, SNF3, that arose from the whole genome duplication
YLR335W	NUP2	Antisens	0.926396	No	No	NA	0.0544112	Nucleoporin involved in nucleocytoplasmic transport; binds to either the nucleoplasmic or cytoplasmic faces of the nuclear pore complex depending on Ran-GTP levels; also has a role in chromatin organization
YML115C	VAN1	PCG	0.926392	No	No	1	0.801135	Component of the mannan polymerase I; complex contains Van1p and Mnn9p and is involved in the first steps of mannan synthesis; mutants are vanadate-resistant
YDR006C	SOK1	PCG	0.926381	No	No	1.18	0.523231	Protein of unknown function; overexpression suppresses the growth defect of mutants lacking protein kinase A activity; involved in cAMP-mediated signaling; localized to the nucleus; similar to the mouse testis-specific protein PBS13
YKR018C	YKR018C	PCG	0.926371	No	No	2.2	0.400464	Protein of unknown function; green fluorescent protein (GFP)-fusion protein localizes to the cytoplasm and nucleus; protein abundance increases in response to DNA replication stress; YKR018C has a paralog, IML2, that arose from the whole genome duplication
YKL162C-A	YKL162C-A	Antisens	0.926293	No	No	NA	0.902111	Dubious open reading frame; unlikely to encode a functional protein, based on available experimental and comparative sequence data
YER163C	GCG1	Antisens	0.926287	No	No	NA	0.610958	Gamma-glutamyl cyclotransferase; cleaves the gamma-glutamyl bond of glutathione to yield 5-oxoproline and a Cys-Gly dipeptide; similar to mammalian pro-apoptotic protein ChaC1; expression of mouse ChaC1 in yeast increases apoptosis; green fluorescent protein (GFP)-fusion protein localizes to the cytoplasm and nucleus; periodically expressed during the metabolic cycle
YIL015W	BAR1	Antisens	0.926278	No	No	NA	-0.447832	Aspartyl protease; secreted into the periplasmic space of mating type a cell; helps cells find mating partners; cleaves and inactivates alpha factor allowing cells to recover from alpha-factor-induced cell cycle arrest
YOR134W	BAG7	PCG	0.926209	No	No	1.49	1.43372	Rho GTPase activating protein (RhoGAP); stimulates the intrinsic GTPase activity of Rho1p, which plays a bud growth by regulating actin cytoskeleton organization and cell wall biosynthesis, resulting in the downregulation of Rho1p; structurally and functionally related to Sac7p; BAG7 has a paralog, SAC7, that arose from the whole genome duplication
YOR270C	VPH1	PCG	0.926168	No	No	11.57	0.327253	Subunit a of vacuolar-ATPase V0 domain; one of two isoforms (Vph1p and Stv1p); Vph1p is located in V-ATPase complexes of the vacuole while Stv1p is located in V-ATPase complexes of the Golgi and endosomes; relative distribution to the vacuolar membrane decreases upon DNA replication stress
YDR093W	DNF2	Antisens	0.926128	No	No	NA	0.288735	Aminophospholipid translocase (flippase); localizes primarily to the plasma membrane; contributes to endocytosis, protein transport and cell polarity; type 4 P-type ATPase; DNF2 has a paralog, DNF1, that arose from the whole genome duplication
YER132C	PMD1	Antisens	0.926096	No	No	NA	0.787179	Protein with an N-terminal kelch-like domain; putative negative regulator of early meiotic gene expression; required, with Mds3p, for growth under alkaline conditions; PMD1 has a paralog, MDS3, that arose from the whole genome duplication
YDR205W	MSC2	Antisens	0.926092	No	No	NA	0.622189	Endoplasmic reticulum zinc transporter; part of a heterodimeric transporter with Zrg17p that transfers zinc from the cytosol to the ER lumen; member of the cation diffusion facilitator family of efflux pumps; localizes to ER and nucleus; mutations affect the cellular distribution of zinc and also confer defects in meiotic recombination between homologous chromatids
YCR072C	RSA4	Antisens	0.926076	No	No	NA	0.176925	WD-repeat protein involved in ribosome biogenesis; may interact with ribosomes; required for maturation and efficient intra-nuclear transport or pre-60S ribosomal subunits, localizes to the nucleolus
YMR232W	FUS2	Antisens	0.926071	No	No	NA	0.796589	Cell fusion regulator; cytoplasmic protein localized to shmoo tip; required for alignment of parental nuclei before nuclear fusion during mating; contains a Dbl-homology domain; binds specifically with activated Cdc42p
YLR384C	IKI3	PCG	0.926061	No	No	1.51	0.12615	Subunit of Elongator complex; Elongator is required for modification of wobble nucleosides in tRNA; maintains structural integrity of Elongator; homolog of human IKAP, mutations in which cause familial dysautonomia (FD)
YKL151C	YKL151C	Antisens	0.92606	No	No	NA	0.796976	NADHX dehydratase; converts (S)-NADHX to NADH in an ATP-dependent manner; homologous to Carkd in mammals, and the C-terminal domain of YjeF in E.coli; enzyme is widespread in eukaryotes, prokaryotes and archaea; YKL151C promoter contains STREs (stress response elements) and expression is induced by heat shock or methyl methanesulfonate; green fluorescent protein (GFP)-fusion protein localizes to …
YKR017C	HEL1	PCG	0.926045	No	No	0.3	0.860128	RING finger ubiquitin ligase (E3); involved in ubiquitylation and degradation of excess histones; interacts with Ubc4p and Rad53p; null mutant sensitive to hydroxyurea (HU)
chrVII_140107_140234	chrVII_140107_140234	Intergenic	0.926018	No	No	NA	NA	NA
YLR305C	STT4	Antisens	0.925971	No	No	NA	0.421496	Phosphatidylinositol-4-kinase; functions in the Pkc1p protein kinase pathway; required for normal vacuole morphology, cell wall integrity, and actin cytoskeleton organization
YERWomega2	YERWomega2	Antisens	0.925919	No	No	NA	NA	Ty5 LTR
YNL322C	KRE1	Antisens	0.925864	No	No	NA	0.598966	Cell wall glycoprotein involved in beta-glucan assembly; serves as a K1 killer toxin membrane receptor
YER040W	GLN3	PCG	0.925849	No	No	0.2	0.879839	Transcriptional activator of genes regulated by NCR; localization and activity regulated by quality of nitrogen source; NCR stands for nitrogen catabolite repression
YBR290W	BSD2	PCG	0.925838	No	Yes	1.43	0.981238	Heavy metal ion homeostasis protein; facilitates trafficking of Smf1p and Smf2p metal transporters to the vacuole where they are degraded, controls metal ion transport, prevents metal hyperaccumulation, functions in copper detoxification
YJL141C	YAK1	Antisens	0.925826	No	No	NA	0.943671	Serine-threonine protein kinase; component of a glucose-sensing system that inhibits growth in response to glucose availability; upon nutrient deprivation Yak1p phosphorylates Pop2p to regulate mRNA deadenylation, the co-repressor Crf1p to inhibit transcription of ribosomal genes, and the stress-responsive transcription factors Hsf1p and Msn2p; nuclear localization negatively regulated by the Ras…
tK(CUU)K	tK(CUU)K	ncRNA	0.925794	No	No	NA	NA	Lysine tRNA (tRNA-Lys), predicted by tRNAscan-SE analysis; a small portion is imported into mitochondria via interaction with mt lysyl-tRNA synthetase Msk1p and is necessary to decode AAG codons at high temperature, when base modification of mt-encoded tRNA-Lys is reduced
YFL011W	HXT10	PCG	0.925696	No	No	1.21	0.729796	Putative hexose transporter; expressed at low levels and expression is repressed by glucose
YLR389C	STE23	PCG	0.925654	No	No	0.8	0.548212	Metalloprotease; involved in N-terminal processing of pro-a-factor to the mature form; expressed in both haploids and diploids; member of the insulin-degrading enzyme family; homolog Axl1p is also involved in processing of pro-a-factor
YIL026C	IRR1	Antisens	0.925476	No	No	NA	0.576919	Subunit of the cohesin complex; which is required for sister chromatid cohesion during mitosis and meiosis and interacts with centromeres and chromosome arms; relocalizes to the cytosol in response to hypoxia; essential for viability
YNL142W	MEP2	PCG	0.925469	No	No	0.4	0.783364	Ammonium permease involved in regulation of pseudohyphal growth; belongs to a ubiquitous family of cytoplasmic membrane proteins that transport only ammonium (NH4+); expression is under the nitrogen catabolite repression regulation
YBR059C	AKL1	PCG	0.92546	No	No	0.8	0.761429	Ser-Thr protein kinase; member (with Ark1p and Prk1p) of the Ark kinase family; involved in endocytosis and actin cytoskeleton organization
YNL208W	YNL208W	PCG	0.9253	No	No	6.5	0.445676	Protein of unknown function; may interact with ribosomes, based on co-purification experiments; authentic, non-tagged protein is detected in purified mitochondria in high-throughput studies; potential orthologs found in other fungi
YIL110W	HPM1	Antisens	0.925297	No	No	NA	0.299622	AdoMet-dependent methyltransferase; involved in a novel 3-methylhistidine modification of ribosomal protein Rpl3p; seven beta-strand MTase family member; null mutant exhibits a weak vacuolar protein sorting defect and caspofungin resistance
YMR279C	YMR279C	Antisens	0.925125	No	No	NA	1.05503	Putative boron transporter involved in boron efflux and resistance; overexpression mutant but not null mutant displays boron tolerance phenotype; identified as a heat-induced gene in a high-throughout screen; YMR279C is not an essential gene; YMR279C has a paralog, ATR1, that arose from the whole genome duplication
YCR068W	ATG15	PCG	0.925057	No	No	0.2	0.963372	Lipase required for intravacuolar lysis of autophagic and Cvt bodies; targeted to intravacuolar vesicles during autophagy via the multivesicular body (MVB) pathway
YHR158C	KEL1	Antisens	0.925031	No	No	NA	0.524475	Protein required for proper cell fusion and cell morphology; functions in a complex with Kel2p to negatively regulate mitotic exit, interacts with Tem1p and Lte1p; localizes to regions of polarized growth; potential Cdc28p substrate; KEL1 has a paralog, KEL2, that arose from the whole genome duplication
chrXV_426226_426634	chrXV_426226_426634	Intergenic	0.925008	No	No	NA	NA	NA
YGR002C	SWC4	PCG	0.924999	No	No	0.4	0.675905	Component of the Swr1p complex that incorporates Htz1p into chromatin; component of the NuA4 histone acetyltransferase complex
YDR430C	CYM1	PCG	0.924956	No	No	0.6	0.219828	Lysine-specific metalloprotease of the pitrilysin family; metalloprotease of the intermembrane space; degrades proteins and presequence peptides cleaved from imported proteins; required for normal mitochondrial morphology
YOR196C	LIP5	PCG	0.924894	No	No	1.49	0.700753	Protein involved in biosynthesis of the coenzyme lipoic acid; has similarity to E. coli lipoic acid synthase
YER167W	BCK2	Antisens	0.924864	No	No	NA	0.676764	Serine/threonine-rich protein involved in PKC1 signaling pathway; protein kinase C (PKC1) signaling pathway controls cell integrity; overproduction suppresses pkc1 mutations
YPR042C	PUF2	Antisens	0.924847	No	No	NA	0.625005	PUF family mRNA-binding protein; Pumilio homology domain confers RNA binding activity; preferentially binds mRNAs encoding membrane-associated proteins; binding site composed of two UAAU tetranucleotides, separated by a 3-nt linker; PUF2 has a paralog, JSN1, that arose from the whole genome duplication
YLR187W	SKG3	Antisens	0.92484	No	No	NA	0.988996	Protein of unknown function; green fluorescent protein (GFP)-fusion protein localizes to the cell periphery, cytoplasm, bud, and bud neck; potential Cdc28p substrate; similar to Skg4p; relocalizes from bud neck to cytoplasm upon DNA replication stress; SKG3 has a paralog, CAF120, that arose from the whole genome duplication
YBR265W	TSC10	PCG	0.924804	No	No	1.1	0.348296	3-ketosphinganine reductase; catalyzes the second step in phytosphingosine synthesis, essential for growth in the absence of exogenous dihydrosphingosine or phytosphingosine, member of short chain dehydrogenase/reductase protein family
YDR144C	MKC7	PCG	0.924802	No	No	3.1	0.331941	GPI-anchored aspartyl protease; member of the yapsin family of proteases involved in cell wall growth and maintenance; shares functions with Yap3p and Kex2p; MKC7 has a paralog, YPS1, that arose from the whole genome duplication
YNR037C	RSM19	PCG	0.924788	No	No	1.94	0.258516	Mitochondrial ribosomal protein of the small subunit; has similarity to E. coli S19 ribosomal protein
YGR161W-B	YGR161W-B	PCG	0.924783	No	No	NA	NA	Retrotransposon TYA Gag and TYB Pol genes; transcribed/translated as one unit; polyprotein is processed to make a nucleocapsid-like protein (Gag), reverse transcriptase (RT), protease (PR), and integrase (IN); similar to retroviral genes
YDL199C	YDL199C	PCG	0.924759	No	No	1.35	0.860513	Putative transporter; member of the sugar porter family
YMR221C	YMR221C	PCG	0.924687	No	No	0.8	0.601611	Putative protein of unknown function; the authentic, non-tagged protein is detected in highly purified mitochondria in high-throughput studies; physical interaction with Atg27p suggests a possible role in autophagy
YPR135W	CTF4	Antisens	0.924686	No	No	NA	0.586944	Chromatin-associated protein; required for sister chromatid cohesion; interacts with DNA polymerase alpha (Pol1p) and may link DNA synthesis to sister chromatid cohesion
YML101C-A	YML101C-A	PCG	0.924643	No	No	NA	0.10887	Dubious open reading frame; unlikely to encode a functional protein, based on available experimental and comparative sequence data
YFR028C	CDC14	PCG	0.924619	No	No	1.3	0.448741	Protein phosphatase required for mitotic exit; required for rDNA segregation; located in nucleolus until liberated by the FEAR and Mitotic Exit Network in anaphase, enabling it to effect a decrease in CDK/B-cyclin activity and mitotic exit; required for meiosis I spindle disassembly; released from nucleolus upon entry into anaphase I of meiosis, resequestered in metaphase II, then released again …
YOR127W	RGA1	Antisens	0.924584	No	No	NA	0.85932	GTPase-activating protein for polarity-establishment protein Cdc42p; implicated in control of septin organization, pheromone response, and haploid invasive growth; relocalizes from bud neck to cytoplasm upon DNA replication stress; RGA1 has a paralog, RGA2, that arose from the whole genome duplication
YNL262W	POL2	Antisens	0.924575	No	No	NA	0.558404	Catalytic subunit of DNA polymerase (II) epsilon; a chromosomal DNA replication polymerase that exhibits processivity and proofreading exonuclease activity; also involved in DNA synthesis during DNA repair; interacts extensively with Mrc1p
YLR188W	MDL1	Antisens	0.924569	No	No	NA	0.330421	Mitochondrial inner membrane half-type ABC transporter; mediates export of peptides generated upon proteolysis of mitochondrial proteins; plays a role in the regulation of cellular resistance to oxidative stress
YGRWdelta19	YGRWdelta19	long_terminal_repeat	0.924537	No	No	NA	NA	Ty1 LTR
YMR272C	SCS7	PCG	0.924527	No	No	2.2	0.895416	Sphingolipid alpha-hydroxylase; functions in the alpha-hydroxylation of sphingolipid-associated very long chain fatty acids, has both cytochrome b5-like and hydroxylase/desaturase domains, not essential for growth
YDL143W	CCT4	Antisens	0.924517	No	No	NA	-0.0853919	Subunit of the cytosolic chaperonin Cct ring complex; related to Tcp1p, required for the assembly of actin and tubulins in vivo
YMR171C	EAR1	Antisens	0.924506	No	No	NA	0.7606	Specificity factor required for Rsp5p-dependent ubiquitination; also required for sorting of specific cargo proteins at the multivesicular body; mRNA is targeted to the bud via the mRNA transport system involving She2p
YNR076W	PAU6	Antisens	0.924492	No	No	NA	NA	Member of the seripauperin multigene family; encoded mainly in subtelomeric regions; active during alcoholic fermentation; regulated by anaerobiosis; negatively regulated by oxygen; repressed by heme; identical to Pau18p
YGL173C	XRN1	PCG	0.924389	No	No	2.57	0.000857125	Evolutionarily-conserved 5'-3' exonuclease; component of cytoplasmic processing (P) bodies involved in mRNA decay; also enters the nucleus and positively regulates transcription initiation and elongation; plays a role in microtubule-mediated processes, filamentous growth, ribosomal RNA maturation, and telomere maintenance; activated by the scavenger decapping enzyme Dcs1p
tT(CGU)K	TRT2	Antisens	0.924337	No	No	NA	0.44042	Threonine tRNA (tRNA-Thr), predicted by tRNAscan-SE analysis; correct folding and efficient aminoacylation require Lhp1p
YNL243W	SLA2	Antisens	0.924328	No	No	NA	0.21874	Adaptor protein that links actin to clathrin and endocytosis; involved in membrane cytoskeleton assembly and cell polarization; present in the actin cortical patch of the emerging bud tip; dimer in vivo
YIL030C	SSM4	Antisens	0.924295	No	No	NA	0.342623	Ubiquitin-protein ligase involved in ER-associated protein degradation; located in the ER/nuclear envelope; ssm4 mutation suppresses mRNA instability caused by an rna14 mutation
YDL132W	CDC53	Antisens	0.924273	No	No	NA	0.682671	Cullin; structural protein of SCF complexes (which also contain Skp1p, Cdc34p, Hrt1p and an F-box protein) involved in ubiquitination; SCF promotes the G1-S transition by targeting G1 cyclins and the Cln-CDK inhibitor Sic1p for degradation
YIL105C	SLM1	Antisens	0.924259	No	No	NA	0.793295	Phosphoinositide PI4,5P(2) binding protein, forms a complex with Slm2p; acts downstream of Mss4p in a pathway regulating actin cytoskeleton organization in response to stress; phosphorylated by the TORC2 complex; protein abundance increases in response to DNA replication stress; SLM1 has a paralog, SLM2, that arose from the whole genome duplication
YNL103W-A	YNL103W-A	PCG	0.924241	No	No	NA	0.225249	Dubious open reading frame; unlikely to encode a functional protein, based on available experimental and comparative sequence data; partially overlaps the verified gene MET4/YNL104C
YPR041W	TIF5	Antisens	0.924138	No	No	NA	-0.116406	Translation initiation factor eIF5; functions both as a GTPase-activating protein to mediate hydrolysis of ribosome-bound GTP and as a GDP dissociation inhibitor to prevent recycling of eIF2
YLR168C	UPS2	PCG	0.924117	No	No	0.9	1.01543	Mitochondrial intermembrane space protein; involved in phospholipid metabolism; has role in regulation of phospholipid metabolism by inhibiting conversion of phosphatidylethanolamine to phosphatidylcholine; null mutant has defects in mitochondrial morphology; similar to Ups1p, Ups3p and to human PRELI; UPS2 has a paralog, UPS3, that arose from the whole genome duplication
YDR238C	SEC26	PCG	0.923986	No	Yes	2.75	0.0748825	Essential beta-coat protein of the COPI coatomer; involved in ER-to-Golgi protein trafficking and maintenance of normal ER morphology; shares 43% sequence identity with mammalian beta-coat protein (beta-COP)
chrIII_126868_127574	chrIII_126868_127574	Intergenic	0.923948	No	No	NA	NA	NA
YPL167C	REV3	PCG	0.923887	No	No	0.4	0.731257	Catalytic subunit of DNA polymerase zeta; involved in translesion synthesis during post-replication repair; required for mutagenesis induced by DNA damage; involved in double-strand break repair
chrXIII_238871_239318	chrXIII_238871_239318	Intergenic	0.923875	No	No	NA	NA	NA
YKR019C	IRS4	PCG	0.923856	No	No	0.1	0.758055	EH domain-containing protein; involved in regulating phosphatidylinositol 4,5-bisphosphate levels and autophagy; Irs4p and Tax4p bind and activate the PtdIns phosphatase Inp51p; Irs4p and Tax4p are involved in localizing Atg17p to the PAS; IRS4 has a paralog, TAX4, that arose from the whole genome duplication
YCL017C	NFS1	Antisens	0.923833	No	No	NA	0.224989	Cysteine desulfurase; involved in iron-sulfur cluster (Fe/S) biogenesis and in thio-modification of mitochondrial and cytoplasmic tRNAs; essential protein located predominantly in mitochondria
chrVI_97636_99085	chrVI_97636_99085	Intergenic	0.923821	No	No	NA	NA	NA
YML070W	DAK1	PCG	0.923814	No	No	1.7	0.299935	Dihydroxyacetone kinase; required for detoxification of dihydroxyacetone (DHA); involved in stress adaptation
YPL147W	PXA1	PCG	0.923763	No	No	1.37	0.702114	Subunit of a heterodimeric peroxisomal ABC transport complex; required for import of long-chain fatty acids into peroxisomes; similarity to human adrenoleukodystrophy transporter ABCD1 and ABCD2 and ALD-related proteins; mutations in ABCD1 cause X-linked adrenoleukodystrophy (X-ALD), a peroxisomal disorder; complex also includes Pxa2p
YNL279W	PRM1	PCG	0.923756	No	No	0.2	0.787878	Pheromone-regulated multispanning membrane protein; involved in membrane fusion during mating; predicted to have 5 transmembrane segments and a coiled coil domain; localizes to the shmoo tip; regulated by Ste12p
YER172C	BRR2	PCG	0.923744	No	No	0.4	0.544909	RNA-dependent ATPase RNA helicase (DEIH box); required for disruption of U4/U6 base-pairing in native snRNPs to activate the spliceosome for catalysis; homologous to human U5-200kD
YDRCdelta9	YDRCdelta9	Antisens	0.92372	No	No	NA	NA	Ty1 LTR
YHR125W	YHR125W	PCG	0.923681	No	No	1.21	0.720839	Dubious open reading frame; unlikely to encode a functional protein, based on available experimental and comparative sequence data
YPR032W	SRO7	PCG	0.923645	No	No	0.3	0.660165	Effector of Rab GTPase Sec4p; forms a complex with Sec4p and t-SNARE Sec9p; involved in exocytosis and docking and fusion of post-Golgi vesicles with plasma membrane; homolog of Drosophila lgl tumor suppressor; SRO7 has a paralog, SRO77, that arose from the whole genome duplication
YML059C	NTE1	Antisens	0.923615	No	No	NA	0.909661	Serine esterase; homolog of human neuropathy target esterase (NTE); Nte1p-mediated phosphatidylcholine turnover influences transcription factor Opi1p localization, affecting transcriptional regulation of phospholipid biosynthesis genes
YKR052C	MRS4	Antisens	0.923571	No	No	NA	0.660761	Iron transporter of the mitochondrial carrier family; mediates Fe2+ transport across the inner mitochondrial membrane; active under low-iron conditions; may transport other cations; protein abundance increases in response to DNA replication stress; MRS4 has a paralog, MRS3, that arose from the whole genome duplication
YBR148W	YSW1	Antisens	0.923528	No	No	NA	0.906358	Protein required for normal prospore membrane formation; interacts with Gip1p, which is the meiosis-specific regulatory subunit of the Glc7p protein phosphatase; expressed specifically in spores and localizes to the prospore membrane; YSW1 has a paralog, SPO21, that arose from the whole genome duplication
YBR149W	ARA1	Antisens	0.923528	No	No	NA	1.00992	NADP+ dependent arabinose dehydrogenase; involved in carbohydrate metabolism; purified as homodimer; naturally occurs with a N-terminus degradation product
YKL168C	KKQ8	Antisens	0.923493	No	No	NA	0.748893	Putative serine/threonine protein kinase with unknown cellular role; KKQ8 has a paralog, HAL5, that arose from the whole genome duplication
YDR347W	MRP1	PCG	0.92343	No	No	1.5	0.248745	Mitochondrial ribosomal protein of the small subunit; MRP1 exhibits genetic interactions with PET122, encoding a COX3-specific translational activator, and with PET123, encoding a small subunit mitochondrial ribosomal protein
YMR174C	PAI3	Antisens	0.92342	No	No	NA	0.908139	Cytoplasmic proteinase A (Pep4p) inhibitor; dependent on Pbs2p and Hog1p protein kinases for osmotic induction; intrinsically unstructured, N-terminal half becomes ordered in the active site of proteinase A upon contact
YBR114W	RAD16	PCG	0.923371	No	No	0.2	0.823592	Protein that binds damaged DNA during NER; binds DNA in an ATP-dependent manner (with Rad7p) during nucleotide excision repair (NER); subunit of Nucleotide Excision Repair Factor 4 (NEF4) and the Elongin-Cullin-Socs (ECS) ligase complex
YLR081W	GAL2	PCG	0.923344	No	No	0.3	0.643137	Galactose permease; required for utilization of galactose; also able to transport glucose
YER089C	PTC2	PCG	0.923326	No	Yes	0.8	0.0957612	Type 2C protein phosphatase (PP2C); dephosphorylates Hog1p to limit maximal osmostress induced kinase activity; dephosphorylates Ire1p to downregulate the unfolded protein response; dephosphorylates Cdc28p; inactivates the DNA damage checkpoint; PTC2 has a paralog, PTC3, that arose from the whole genome duplication
YGL241W	KAP114	Antisens	0.92318	No	No	NA	0.661697	Karyopherin, responsible for nuclear import of specific proteins; cargoes include Spt15p, Sua7p, histones H2A and H2B, and Nap1p; amino terminus shows similarity to those of other importins, particularly Cse1p; localization is primarily nuclear; function is regulated by sumoylation; protein abundance increases in response to DNA replication stress
YHR080C	YHR080C	PCG	0.923143	No	Yes	0.8	0.852059	Protein of unknown function; may interact with ribosomes, based on co-purification experiments; the authentic, non-tagged protein is detected in highly purified mitochondria in high-throughput studies; YHR080C has a paralog, YSP2, that arose from the whole genome duplication
chrXVI_759619_759883	chrXVI_759619_759883	Intergenic	0.923135	No	No	NA	NA	NA
YOR337W	TEA1	PCG	0.923094	No	No	0.3	0.590176	Ty1 enhancer activator involved in Ty enhancer-mediated transcription; required for full levels of Ty enhancer-mediated transcription; C6 zinc cluster DNA-binding protein
YLL055W	YCT1	Antisens	0.92302	No	No	NA	0.818271	High-affinity cysteine-specific transporter; has similarity to the Dal5p family of transporters; green fluorescent protein (GFP)-fusion protein localizes to the endoplasmic reticulum; YCT1 is not an essential gene
YER148W	SPT15	PCG	0.922994	No	No	7.69	-0.101224	TATA-binding protein; general transcription factor that interacts with other factors to form the preinitiation complex at promoters, essential for viability
YML047C	PRM6	PCG	0.922986	No	No	3.17	0.661671	Potassium transporter that mediates K+ influx; activates high-affinity Ca2+ influx system (HACS) during mating pheromone response; expression up-regulated in response to alpha factor; regulated by Ste12p during mating; localized to sites of polarized growth; member of a fungal-specific gene family; PRM6 has a paralog, KCH1, that arose from the whole genome duplication
YML023C	NSE5	PCG	0.922957	No	No	0.6	0.737723	Component of the SMC5-SMC6 complex; this complex plays a key role in the removal of X-shaped DNA structures that arise between sister chromatids during DNA replication and repair
YDR160W	SSY1	Antisens	0.922922	No	No	NA	0.791763	Component of the SPS plasma membrane amino acid sensor system; senses external amino acid concentration and transmits intracellular signals that result in regulation of expression of amino acid permease genes; other members are Ssy1p, Ptr3p, and Ssy5p
YJL133W	MRS3	Antisens	0.922884	No	No	NA	0.376031	Iron transporter, mediates Fe2+ transport across inner mito membrane; mitochondrial carrier family member; active under low-iron conditions; may transport other cations; MRS3 has a paralog, MRS4, that arose from the whole genome duplication
YPL248C	GAL4	Antisens	0.922809	No	No	NA	0.752716	DNA-binding transcription factor required for activating GAL genes; responds to galactose; repressed by Gal80p and activated by Gal3p
YLL029W	FRA1	PCG	0.922799	No	No	1.1	0.717837	Protein involved in negative regulation of iron regulon transcription; forms an iron independent complex with Fra2p, Grx3p, and Grx4p; cytosolic; mutant fails to repress transcription of iron regulon and is defective in spore formation
YFL052W	YFL052W	PCG	0.92279	No	No	1.21	0.986957	Putative zinc cluster protein that contains a DNA binding domain; computational analysis suggests a role as a transcription factor; null mutant is sensitive to Calcofluor White, low osmolarity, and heat, suggesting a role for YFL052Wp in cell wall integrity
YOR324C	FRT1	Antisens	0.922789	No	No	NA	0.719093	Tail-anchored ER membrane protein of unknown function; substrate of the phosphatase calcineurin; interacts with homolog Frt2p; promotes cell growth in stress conditions, possibly via a role in posttranslational translocation; FRT1 has a paralog, FRT2, that arose from the whole genome duplication
YPR104C	FHL1	PCG	0.922771	No	No	0.6	0.58864	Regulator of ribosomal protein (RP) transcription; has forkhead associated domain that binds phosphorylated proteins; recruits coactivator Ifh1p or corepressor Crf1p to RP gene promoters; also has forkhead DNA-binding domain though in vitro DNA binding assays give inconsistent results; computational analyses suggest it binds DNA directly at highly active RP genes and indirectly through Rap1p moti…
YCL025C	AGP1	PCG	0.922757	No	No	1.8	1.2519	Low-affinity amino acid permease with broad substrate range; involved in uptake of asparagine, glutamine, and other amino acids; expression regulated by SPS plasma membrane amino acid sensor system (Ssy1p-Ptr3p-Ssy5p); AGP1 has a paralog, GNP1, that arose from the whole genome duplication
YJR001W	AVT1	Antisens	0.922732	No	No	NA	0.596745	Vacuolar transporter; imports large neutral amino acids into the vacuole; member of a family of seven S. cerevisiae genes (AVT1-7) related to vesicular GABA-glycine transporters
YMR111C	YMR111C	PCG	0.922711	No	No	0.3	0.630887	Protein of unknown function; green fluorescent protein (GFP)-fusion protein localizes to the nucleus; YMR111C is not an essential gene; forms nuclear foci upon DNA replication stress
YPL254W	HFI1	PCG	0.922663	No	No	0.6	0.756817	Adaptor protein required for structural integrity of the SAGA complex; a histone acetyltransferase-coactivator complex that is involved in global regulation of gene expression through acetylation and transcription functions
YDR452W	PPN1	PCG	0.922563	No	No	1.79	0.717169	Vacuolar endopolyphosphatase with a role in phosphate metabolism; functions as a homodimer; relocalizes from vacuole to cytoplasm upon DNA replication stress
YDR386W	MUS81	Antisens	0.922546	No	No	NA	0.732577	Subunit of structure-specific Mms4p-Mus81p endonuclease; cleaves branched DNA; involved in DNA repair, replication fork stability, and joint molecule formation/resolution during meiotic recombination; promotes template switching during break-induced replication (BIR), causing non-reciprocal translocations (NRTs); helix-hairpin-helix protein; phosphorylation of non-catalytic subunit Mms4p by Cdc28…
YPL101W	ELP4	PCG	0.922444	No	No	1	0.511759	Subunit of hexameric RecA-like ATPase Elp456 Elongator subcomplex; which is required for modification of wobble nucleosides in tRNA; required for Elongator structural integrity
YIL012W	YIL012W	Antisens	0.922375	No	No	NA	0.751637	Dubious open reading frame; unlikely to encode a functional protein, based on available experimental and comparative sequence data
YBR212W	NGR1	Antisens	0.922352	No	No	NA	0.773964	RNA binding protein that negatively regulates growth rate; interacts with the 3' UTR of the mitochondrial porin (POR1) mRNA and enhances its degradation; overexpression impairs mitochondrial function; interacts with Dhh1p to mediate POR1 mRNA decay; expressed in stationary phase
YHR087W	RTC3	PCG	0.922227	No	No	1.1	2.51787	Protein of unknown function involved in RNA metabolism; has structural similarity to SBDS, the human protein mutated in Shwachman-Diamond Syndrome (the yeast SBDS ortholog = SDO1); null mutation suppresses cdc13-1 temperature sensitivity; protein abundance increases in response to DNA replication stress
YDR477W	SNF1	Antisens	0.922163	No	No	NA	0.569804	AMP-activated serine/threonine protein kinase; found in a complex containing Snf4p and members of the Sip1p/Sip2p/Gal83p family; required for transcription of glucose-repressed genes, thermotolerance, sporulation, and peroxisome biogenesis; involved in regulation of the nucleocytoplasmic shuttling of Hxk2p; regulates filamentous growth in response to starvation; SUMOylation by Mms21p inhibits its…
YML100W	TSL1	Antisens	0.922161	No	No	NA	0.912794	Large subunit of trehalose 6-phosphate synthase/phosphatase complex; Tps1p-Tps2p complex converts uridine-5'-diphosphoglucose and glucose 6-phosphate to trehalose; contributes to survival to acute lethal heat stress; mutant has aneuploidy tolerance; protein abundance increases in response to DNA replication stress; TSL1 has a paralog, TPS3, that arose from the whole genome duplication
YDR353W	TRR1	Antisens	0.922157	No	No	NA	-0.294315	Cytoplasmic thioredoxin reductase; key regulatory enzyme that determines the redox state of the thioredoxin system, which acts as a disulfide reductase system and protects cells against both oxidative and reductive stress; protein abundance increases in response to DNA replication stress; TRR1 has a paralog, TRR2, that arose from the whole genome duplication
YOR187W	TUF1	PCG	0.922155	No	No	7.44	-0.118802	Mitochondrial translation elongation factor Tu; comprises both GTPase and guanine nucleotide exchange factor activities, while these activities are found in separate proteins in S. pombe and humans
YML027W	YOX1	Antisens	0.922124	No	No	NA	1.1329	Homeobox transcriptional repressor; binds to Mcm1p and to early cell cycle boxes (ECBs) in the promoters of cell cycle-regulated genes expressed in M/G1 phase; expression is cell cycle-regulated; potential Cdc28p substrate; relocalizes from nucleus to cytoplasm upon DNA replication stress; YOX1 has a paralog, YHP1, that arose from the whole genome duplication
YDR139C	RUB1	Antisens	0.922122	No	No	NA	0.574701	Ubiquitin-like protein with similarity to mammalian NEDD8; conjugation (neddylation) substrates include the cullins Cdc53p, Rtt101p, and Cul3p; activated by Ula1p and Uba3p (E1 enzyme pair); conjugation mediated by Ubc12p (E2 enzyme)
YBR138C	YBR138C	PCG	0.922038	No	No	0.1	0.722379	Cytoplasmic protein of unknown function; potentially phosphorylated by Cdc28p; YBR138C is not an essential gene
YBR049C	REB1	Antisens	0.922015	No	No	NA	0.469517	RNA polymerase I enhancer binding protein; DNA binding protein that binds to genes transcribed by both RNA polymerase I and RNA polymerase II; required for termination of RNA polymerase I transcription; REB1 has a paralog, NSI1, that arose from the whole genome duplication
YBL076C	ILS1	PCG	0.922001	No	Yes	5.8	-0.615013	Cytoplasmic isoleucine-tRNA synthetase; target of the G1-specific inhibitor reveromycin A
YBR211C	AME1	Antisens	0.921948	No	No	NA	0.707194	Essential kinetochore protein associated with microtubules and SPBs; component of the kinetochore sub-complex COMA (Ctf19p, Okp1p, Mcm21p, Ame1p); involved in spindle checkpoint maintenance; orthologous to human centromere constitutive-associated network (CCAN) subunit CENP-U and fission yeast Mis17; relative distribution to the nucleus increases upon DNA replication stress
YNL236W	SIN4	Antisens	0.921925	No	No	NA	0.60241	Subunit of the RNA polymerase II mediator complex; associates with core polymerase subunits to form the RNA polymerase II holoenzyme; contributes to both postive and negative transcriptional regulation; dispensible for basal transcription
YKL084W	HOT13	PCG	0.92192	No	No	1.2	-0.00173273	Zinc-binding mitochondrial intermembrane space (IMS) protein; involved in a disulfide relay system for IMS import of cysteine-containing proteins; binds Mia40p and stimulates its Erv1p-dependent oxidation, probably by sequestering zinc
YLR227C	ADY4	Antisens	0.921902	No	No	NA	0.540955	Structural component of the meiotic outer plaque; outer plaque is a membrane-organizing center that assembles on the cytoplasmic face of the spindle pole body during meiosis II and triggers the formation of the prospore membrane
chrVIII_528759_529909	chrVIII_528759_529909	Intergenic	0.9219	No	No	NA	NA	NA
YAR002W	NUP60	PCG	0.921895	No	Yes	1.27	0.546138	FG-nucleoporin component of central core of the nuclear pore complex; contributes directly to nucleocytoplasmic transport and maintenance of the nuclear pore complex (NPC) permeability barrier and is involved in gene tethering at the nuclear periphery; relocalizes to the cytosol in response to hypoxia; both NUP1 and NUP60 are homologous to human NUP153
YPL190C	NAB3	PCG	0.921855	No	Yes	0.8	0.569618	RNA-binding protein, subunit of Nrd1 complex (Nrd1p-Nab3p-Sen1p); complex interacts with exosome to mediate 3'-end formation of some mRNAs, snRNAs, snoRNAs, and CUTs; required for termination of non-poly(A) transcripts and efficient splicing; Nrd1-Nab3 pathway appears to have a role in rapid suppression of some genes when cells are shifted to poor growth conditions, indicating role for Nrd1-Nab3 …
YHR031C	RRM3	PCG	0.921842	No	No	0.4	0.685852	DNA helicase involved in rDNA replication and Ty1 transposition; relieves replication fork pauses at telomeric regions; structurally and functionally related to Pif1p
YJL112W	MDV1	Antisens	0.92182	No	No	NA	0.620689	Peripheral protein of cytosolic face of mitochondrial outer membrane; required for mitochondrial fission; interacts with Fis1p and with the dynamin-related GTPase Dnm1p; contains WD repeats; MDV1 has a paralog, CAF4, that arose from the whole genome duplication
chrI_177161_179139	chrI_177161_179139	Intergenic	0.921796	No	No	NA	NA	NA
chrI_28109_31428	chrI_28109_31428	Intergenic	0.921791	No	No	NA	NA	NA
YGL151W	NUT1	PCG	0.921744	No	No	1.07	0.573047	Component of the RNA polymerase II mediator complex; mediator is required for transcriptional activation and also has a role in basal transcription
YGR067C	YGR067C	Antisens	0.921726	No	No	NA	0.275565	Putative protein of unknown function; contains a zinc finger motif similar to that of Adr1p
YPL066W	RGL1	Antisens	0.921688	No	No	NA	0.898056	Regulator of Rho1p signaling, cofactor of Tus1p; required for the localization of Tus1p during all phases of cytokinesis; green fluorescent protein (GFP)-fusion protein localizes to the bud neck and cytoplasm; null mutant is viable and exhibits growth defect on a non-fermentable (respiratory) carbon source
YHR174W	ENO2	PCG	0.921682	No	No	392	-0.937031	Enolase II, a phosphopyruvate hydratase; catalyzes conversion of 2-phosphoglycerate to phosphoenolpyruvate during glycolysis and the reverse reaction during gluconeogenesis; expression induced in response to glucose; ENO2 has a paralog, ENO1, that arose from the whole genome duplication
YDL146W	LDB17	PCG	0.921667	No	No	0.1	0.722552	Protein involved in the regulation of endocytosis; transiently recruited to actin cortical patches in a SLA1-dependent manner after late coat component assembly; GFP-fusion protein localizes to the periphery, cytoplasm, bud, and bud neck
YOL153C	YOL153C	PCG	0.921647	No	No	NA	0.951738	Hypothetical protein
YNL194C	YNL194C	Antisens	0.921644	No	No	NA	0.743937	Integral membrane protein; required for sporulation and plasma membrane sphingolipid content; similar to SUR7; GFP-fusion protein is induced in response to the DNA-damaging agent MMS; GFP-fusion protein is more abundant at MCCs (membrane compartment occupied by Can1) in the presence of glycerol and oleate; YNL194C has a paralog, FMP45, that arose from the whole genome duplication
YOL036W	YOL036W	Antisens	0.92164	No	No	NA	0.778657	Protein of unknown function; potential Cdc28p substrate; YOL036W has a paralog, YIR016W, that arose from the whole genome duplication
YLR394W	CST9	Antisens	0.921587	No	No	NA	0.83332	SUMO E3 ligase; required for synaptonemal complex formation; localizes to synapsis initiation sites on meiotic chromosomes; potential Cdc28p substrate
YMR307W	GAS1	Antisens	0.921581	No	No	NA	-0.183092	Beta-1,3-glucanosyltransferase; required for cell wall assembly and also has a role in transcriptional silencing; localizes to the cell surface via a glycosylphosphatidylinositol (GPI) anchor; also found at the nuclear periphery
YERWdelta22	YERWdelta22	long_terminal_repeat	0.921558	No	No	NA	NA	Ty1 LTR
chrXI_261635_261781	chrXI_261635_261781	Intergenic	0.921545	No	No	NA	NA	NA
YOL127W	RPL25	Antisens	0.92152	No	No	NA	NA	Ribosomal 60S subunit protein L25; primary rRNA-binding ribosomal protein component of large ribosomal subunit; binds to 25S rRNA via a conserved C-terminal motif; homologous to mammalian ribosomal protein L23A and bacterial L23
chrXII_722515_722840	chrXII_722515_722840	Intergenic	0.921508	No	No	NA	NA	NA
YAL020C	ATS1	Antisens	0.921493	No	No	NA	-0.116522	Protein required for modification of wobble nucleosides in tRNA; acts with Elongator complex, Kti11p, and Kti12p; has a potential role in regulatory interactions between microtubules and the cell cycle
YIL028W	YIL028W	PCG	0.921412	No	No	0.1	0.803798	Dubious open reading frame; unlikely to encode a functional protein, based on available experimental and comparative sequence data
YDL147W	RPN5	PCG	0.921389	No	No	4.6	0.542899	Subunit of the CSN and 26S proteasome lid complexes; similar to mammalian p55 subunit and to another S. cerevisiae regulatory subunit, Rpn7p; Rpn5p is an essential protein; the COP9 signalosome is also known as the CSN
YBL033C	RIB1	PCG	0.921337	No	No	1.6	0.410591	GTP cyclohydrolase II; catalyzes the first step of the riboflavin biosynthesis pathway
YJL100W	LSB6	Antisens	0.921332	No	No	NA	0.795089	Type II phosphatidylinositol 4-kinase; binds Las17p, a homolog of human Wiskott-Aldrich Syndrome protein involved in actin patch assembly and actin polymerization
YDR089W	YDR089W	PCG	0.921277	No	No	0.81	0.796192	Protein of unknown function; deletion confers resistance to nickel; contains an SPX domain, which is found in proteins involved in phosphate homeostasis; relocalizes from vacuole to cytoplasm upon DNA replication stress
YOL025W	LAG2	Antisens	0.921204	No	No	NA	0.761177	Protein that negatively regulates the SCF E3-ubiquitin ligase; regulates by interacting with and preventing neddyation of the cullin subunit, Cdc53p; longevity determinant that is preferentially expressed in young cells; similar to mammalian Cand1
YKL209C	STE6	PCG	0.921169	No	Yes	3.09	0.553969	Plasma membrane ATP-binding cassette (ABC) transporter; required for the export of a-factor, catalyzes ATP hydrolysis coupled to a-factor transport; contains 12 transmembrane domains and two ATP binding domains; expressed only in MATa cells
YOR370C	MRS6	PCG	0.921083	No	No	1.68	0.516219	Rab escort protein; forms a complex with the Ras-like small GTPase Ypt1p that is required for the prenylation of Ypt1p by protein geranylgeranyltransferase type II (Bet2p-Bet4p); sequence similarity to mammalian choroideraemia gene; relative distribution to the nucleus increases upon DNA replication stress
YHR214W	YHR214W	PCG	0.921065	No	No	0.6	NA	Putative protein of unknown function; predicted to be a glycosylphosphatidylinositol-modified (GPI) protein; YHR214W has a paralog, YAR066W, that arose from a segmental duplication
YJL109C	UTP10	PCG	0.921038	No	No	1.67	0.0289977	Nucleolar protein; component of the small subunit (SSU) processome containing the U3 snoRNA that is involved in processing of pre-18S rRNA; mutant has increased aneuploidy tolerance
chrVIII_10445_11781	chrVIII_10445_11781	Intergenic	0.920995	No	No	NA	NA	NA
YDR284C	DPP1	PCG	0.920994	No	No	1.67	0.85908	Diacylglycerol pyrophosphate (DGPP) phosphatase; zinc-regulated vacuolar membrane-associated lipid phosphatase, dephosphorylates DGPP to phosphatidate (PA) and Pi, then PA to diacylglycerol; involved in lipid signaling and cell metabolism
YOR375C	GDH1	PCG	0.920964	No	No	9.21	-0.297025	NADP(+)-dependent glutamate dehydrogenase; synthesizes glutamate from ammonia and alpha-ketoglutarate; rate of alpha-ketoglutarate utilization differs from Gdh3p; expression regulated by nitrogen and carbon sources; GDH1 has a paralog, GDH3, that arose from the whole genome duplication
YBL061C	SKT5	PCG	0.920908	No	No	1.42	0.320783	Activator of Chs3p (chitin synthase III) during vegetative growth; recruits Chs3p to the bud neck via interaction with Bni4p; SKT5 has a paralog, SHC1, that arose from the whole genome duplication
YER098W	UBP9	Antisens	0.920892	No	No	NA	1.0832	Ubiquitin-specific protease that cleaves ubiquitin-protein fusions; UBP9 has a paralog, UBP13, that arose from the whole genome duplication
YLR410W	VIP1	Antisens	0.920835	No	No	NA	0.0756303	Inositol hexakisphosphate and inositol heptakisphosphate kinase; inositol heptakisphosphate (IP7) production is important for phosphate signaling; involved in cortical actin cytoskeleton function, and invasive pseudohyphal growth analogous to S. pombe asp1; inositol hexakisphosphate is also known as IP6
YHR154W	RTT107	Antisens	0.920799	No	No	NA	0.55633	Protein implicated in Mms22-dependent DNA repair during S phase; involved in recruiting the SMC5/6 complex to double-strand breaks; DNA damage induces phosphorylation by Mec1p at one or more SQ/TQ motifs; interacts with Mms22p and Slx4p; has four BRCT domains; has a role in regulation of Ty1 transposition; relative distribution to nuclear foci increases upon DNA replication stress
YDR476C	YDR476C	PCG	0.92076	No	No	0.9	0.522949	Putative protein of unknown function; green fluorescent protein (GFP)-fusion protein localizes to the endoplasmic reticulum; YDR476C is not an essential gene
chrIV_1340851_1342345	chrIV_1340851_1342345	Intergenic	0.920746	No	No	NA	NA	NA
YNL055C	POR1	Antisens	0.920745	No	No	NA	-0.456461	Mitochondrial porin (voltage-dependent anion channel); outer membrane protein required for maintenance of mitochondrial osmotic stability and mitochondrial membrane permeability; couples the glutathione pools of the intermembrane space (IMS) and the cytosol; phosphorylated; protein abundance increases in response to DNA replication stress; POR1 has a paralog, POR2, that arose from the whole genom…
YLR436C	ECM30	PCG	0.920638	No	Yes	0.8	0.681364	Putative protein of unknown function; may play a role in cell wall biosynthesis, mutants have abormal relative levels of mannose and glucose and have Gap1p sorting and transport defects; (GFP)-fusion protein localizes to the cytoplasm
YBR081C	SPT7	Antisens	0.920599	No	No	NA	0.483254	Subunit of the SAGA transcriptional regulatory complex; involved in proper assembly of the complex; also present as a C-terminally truncated form in the SLIK/SALSA transcriptional regulatory complex
YMR131C	RRB1	PCG	0.920587	No	No	4.79	-0.155407	Nuclear protein involved in early steps of ribosome biogenesis; physically interacts with the ribosomal protein Rpl3p; essential gene
YDR257C	RKM4	Antisens	0.920584	No	No	NA	0.717343	Ribosomal lysine methyltransferase; specific for monomethylation of Rpl42ap and Rpl42bp (lysine 55); nuclear SET-domain containing protein
chrXIII_759322_759666	chrXIII_759322_759666	Intergenic	0.920554	No	No	NA	NA	NA
chrII_392427_392978	chrII_392427_392978	Intergenic	0.920475	No	No	NA	NA	NA
chrXVI_785807_785997	chrXVI_785807_785997	Intergenic	0.920473	No	No	NA	NA	NA
YPR128C	ANT1	Antisens	0.920455	No	No	NA	0.643004	Peroxisomal adenine nucleotide transporter; involved in beta-oxidation of medium-chain fatty acid; required for peroxisome proliferation
YNR045W	PET494	Antisens	0.920429	No	No	NA	0.858197	Mitochondrial translational activator specific for the COX3 mRNA; acts together with Pet54p and Pet122p; located in the mitochondrial inner membrane
chrXII_1032148_1032484	chrXII_1032148_1032484	Intergenic	0.920418	No	No	NA	NA	NA
YDL239C	ADY3	PCG	0.920394	No	No	1.35	0.747058	Protein required for spore wall formation; thought to mediate assembly of a Don1p-containing structure at the leading edge of the prospore membrane via interaction with spindle pole body components; potentially phosphorylated by Cdc28p; ADY3 has a paralog, CNM67, that arose from the whole genome duplication
YGL196W	DSD1	Antisens	0.920373	No	No	NA	0.724817	D-serine dehydratase (aka D-serine ammonia-lyase); converts D-serine to pyruvate and ammonia by a reaction dependent on pyridoxal 5'-phosphate and zinc; may play a role in D-serine detoxification; L-serine is not a substrate
YLR189C	ATG26	PCG	0.920326	No	No	0.7	0.796897	UDP-glucose:sterol glucosyltransferase; conserved enzyme involved in synthesis of sterol glucoside membrane lipids; in contrast to ATG26 from P. pastoris, S. cerevisiae ATG26 is not involved in autophagy
YDL109C	YDL109C	Antisens	0.920298	No	No	NA	0.827238	Putative lipase; involved in lipid metabolism; not an essential gene; YDL109C has a paralog, ROG1, that arose from the whole genome duplication
YELWdelta6	YELWdelta6	long_terminal_repeat	0.920292	No	No	NA	NA	Ty1 LTR
YGRWsigma6	YGRWsigma6	long_terminal_repeat	0.920292	No	No	NA	NA	Ty3 LTR
YMLCdelta1	YMLCdelta1	long_terminal_repeat	0.920292	No	No	NA	NA	Ty1 LTR
tD(GUC)B	tD(GUC)B	ncRNA	0.920292	No	No	NA	NA	Aspartate tRNA (tRNA-Asp), predicted by tRNAscan-SE analysis
tR(UCU)B	tR(UCU)B	ncRNA	0.920292	No	No	NA	NA	Arginine tRNA (tRNA-Arg), predicted by tRNAscan-SE analysis; one of 11 nuclear tRNA genes containing the tDNA-anticodon UCU (converted to mcm5-UCU in the mature tRNA); decodes AGA codons into arginine; one of 19 nuclear tRNAs for arginine; part of dicistronic transcript with tD(GUC)B
tR(UCU)E	tR(UCU)E	ncRNA	0.920292	No	No	NA	NA	Arginine tRNA (tRNA-Arg), predicted by tRNAscan-SE analysis; one of 11 nuclear tRNA genes containing the tDNA-anticodon UCU (converted to mcm5-UCU in the mature tRNA), decodes AGA codons into arginine, one of 19 nuclear tRNAs for arginine
tR(UCU)G1	tR(UCU)G1	ncRNA	0.920292	No	No	NA	NA	Arginine tRNA (tRNA-Arg), predicted by tRNAscan-SE analysis; one of 11 nuclear tRNA genes containing the tDNA-anticodon UCU (converted to mcm5-UCU in the mature tRNA), decodes AGA codons into arginine, one of 19 nuclear tRNAs for arginine
tR(UCU)G2	tR(UCU)G2	ncRNA	0.920292	No	No	NA	NA	Arginine tRNA (tRNA-Arg), predicted by tRNAscan-SE analysis; one of 11 nuclear tRNA genes containing the tDNA-anticodon UCU (converted to mcm5-UCU in the mature tRNA), decodes AGA codons into arginine, one of 19 nuclear tRNAs for arginine
tR(UCU)G3	tR(UCU)G3	ncRNA	0.920292	No	No	NA	NA	Arginine tRNA (tRNA-Arg), predicted by tRNAscan-SE analysis; one of 11 nuclear tRNA genes containing the tDNA-anticodon UCU (converted to mcm5-UCU in the mature tRNA), decodes AGA codons into arginine, one of 19 nuclear tRNAs for arginine
tR(UCU)K	tR(UCU)K	ncRNA	0.920292	No	No	NA	NA	Arginine tRNA (tRNA-Arg), predicted by tRNAscan-SE analysis; one of 11 nuclear tRNA genes containing the tDNA-anticodon UCU (converted to mcm5-UCU in the mature tRNA), decodes AGA codons into arginine, one of 19 nuclear tRNAs for arginine
tR(UCU)M1	tR(UCU)M1	ncRNA	0.920292	No	No	NA	NA	Arginine tRNA (tRNA-Arg), predicted by tRNAscan-SE analysis; one of 11 nuclear tRNA genes containing the tDNA-anticodon UCU (converted to mcm5-UCU in the mature tRNA), decodes AGA codons into arginine, one of 19 nuclear tRNAs for arginine
tR(UCU)M2	tR(UCU)M2	ncRNA	0.920292	No	No	NA	NA	Arginine tRNA (tRNA-Arg), predicted by tRNAscan-SE analysis; one of 11 nuclear tRNA genes containing the tDNA-anticodon UCU (converted to mcm5-UCU in the mature tRNA), decodes AGA codons into arginine, one of 19 nuclear tRNAs for arginine
YLR377C	FBP1	PCG	0.920282	No	No	3.17	0.757639	Fructose-1,6-bisphosphatase; key regulatory enzyme in the gluconeogenesis pathway, required for glucose metabolism; undergoes either proteasome-mediated or autophagy-mediated degradation depending on growth conditions; glucose starvation results in redistribution to the periplasm; interacts with Vid30p
chrIX_216090_216515	chrIX_216090_216515	Intergenic	0.920249	No	No	NA	NA	NA
YMR006C	PLB2	Antisens	0.920204	No	No	NA	-0.114239	Phospholipase B (lysophospholipase) involved in lipid metabolism; displays transacylase activity in vitro; overproduction confers resistance to lysophosphatidylcholine
YML127W	RSC9	Antisens	0.920182	No	No	NA	0.507501	Component of the RSC chromatin remodeling complex; DNA-binding protein involved in the synthesis of rRNA and in transcriptional repression and activation of genes regulated by the Target of Rapamycin (TOR) pathway
YPR138C	MEP3	PCG	0.920158	No	No	1.85	0.761307	Ammonium permease of high capacity and low affinity; belongs to a ubiquitous family of cytoplasmic membrane proteins that transport only ammonium (NH4+); expression is under the nitrogen catabolite repression regulation ammonia permease; MEP3 has a paralog, MEP1, that arose from the whole genome duplication
chrV_265924_266371	chrV_265924_266371	Intergenic	0.920157	No	No	NA	NA	NA
YLR359W	ADE13	Antisens	0.920041	No	No	NA	-0.219674	Adenylosuccinate lyase; catalyzes two steps in the 'de novo' purine nucleotide biosynthetic pathway; expression is repressed by adenine and activated by Bas1p and Pho2p; mutations in human ortholog ADSL cause adenylosuccinase deficiency
YDR006C	SOK1	Antisens	0.920011	No	No	NA	0.523231	Protein of unknown function; overexpression suppresses the growth defect of mutants lacking protein kinase A activity; involved in cAMP-mediated signaling; localized to the nucleus; similar to the mouse testis-specific protein PBS13
YJR004C	SAG1	PCG	0.91995	No	No	0.3	0.954582	Alpha-agglutinin of alpha-cells; binds to Aga1p during agglutination, N-terminal half is homologous to the immunoglobulin superfamily and contains binding site for a-agglutinin, C-terminal half is highly glycosylated and contains GPI anchor
YHL028W	WSC4	Antisens	0.919937	No	No	NA	0.710404	Endoplasmic reticulum (ER) membrane protein; involved in the translocation of soluble secretory proteins and insertion of membrane proteins into the ER membrane; may also have a role in the stress response but has only partial functional overlap with WSC1-3
YLR277C	YSH1	PCG	0.919913	No	No	0.68	0.488528	Putative endoribonuclease; subunit of the mRNA cleavage and polyadenylation specificity complex; required for 3' processing, splicing, and transcriptional termination of mRNAs and snoRNAs; protein abundance increases in response to DNA replication stress; YSH1 has a paralog, SYC1, that arose from the whole genome duplication
YDR508C	GNP1	Antisens	0.919879	No	No	NA	0.52603	High-affinity glutamine permease; also transports Leu, Ser, Thr, Cys, Met and Asn; expression is fully dependent on Grr1p and modulated by the Ssy1p-Ptr3p-Ssy5p (SPS) sensor of extracellular amino acids; GNP1 has a paralog, AGP1, that arose from the whole genome duplication
YOR151C	RPB2	PCG	0.919865	No	No	3.9	0.0468086	RNA polymerase II second largest subunit B150; part of central core; similar to bacterial beta subunit
YIL056W	VHR1	PCG	0.919862	No	No	0.3	0.834491	Transcriptional activator; required for the vitamin H-responsive element (VHRE) mediated induction of VHT1 (Vitamin H transporter) and BIO5 (biotin biosynthesis intermediate transporter) in response to low biotin concentrations; VHR1 has a paralog, VHR2, that arose from the whole genome duplication
YMR068W	AVO2	PCG	0.919857	No	No	3.17	0.576516	Component of a complex containing the Tor2p kinase and other proteins; complex may have a role in regulation of cell growth
YGL100W	SEH1	Antisens	0.919847	No	No	NA	0.487411	Component of two distinct complexes; subunit of the Nup84 nuclear pore sub-complex (NPC) and the Seh1-associated (SEA) complex; the the NUP84 subcomplex contributes to nucleocytoplasmic transport and NPC biogenesis; the SEA complex is a coatamer-related complex that associates dynamically with the vacuole; homologous to human SEH1
YCL016C	DCC1	PCG	0.919836	No	No	0.3	0.825628	Subunit of a complex with Ctf8p and Ctf18p; shares some components with Replication Factor C; required for sister chromatid cohesion and telomere length maintenance
YPL160W	CDC60	Antisens	0.919817	No	No	NA	-0.587383	Cytosolic leucyl tRNA synthetase; ligates leucine to the appropriate tRNA
chrII_767742_768096	chrII_767742_768096	Intergenic	0.919816	No	No	NA	NA	NA
YKR079C	TRZ1	PCG	0.919765	No	No	0.73	0.515929	tRNA 3'-end processing endonuclease tRNase Z; also localized to mitochondria and interacts genetically with Rex2 exonuclease; homolog of the human candidate prostate cancer susceptibility gene ELAC2
YOL063C	CRT10	Antisens	0.919714	No	No	NA	0.668744	Protein involved in transcriptional regulation of RNR2 and RNR3; expression of the gene is induced by DNA damage and null mutations confer increased resistance to hydroxyurea; N-terminal region has a leucine repeat and a WD40 repeat
YIL109C	SEC24	Antisens	0.919709	No	No	NA	0.285827	Component of the Sec23p-Sec24p heterodimer of the COPII vesicle coat; required for cargo selection during vesicle formation in ER to Golgi transport; homologous to Sfb3p; SEC24 has a paralog, SFB2, that arose from the whole genome duplication
YORWdelta19	YORWdelta19	long_terminal_repeat	0.919693	No	No	NA	NA	Ty1 LTR
YORWtau2	YORWtau2	long_terminal_repeat	0.919693	No	No	NA	NA	Ty4 LTR
YER111C	SWI4	PCG	0.919685	Yes	Yes	0.4	0.863091	DNA binding component of the SBF complex (Swi4p-Swi6p); a transcriptional activator that in concert with MBF (Mbp1-Swi6p) regulates late G1-specific transcription of targets including cyclins and genes required for DNA synthesis and repair; Slt2p-independent regulator of cold growth; acetylation at two sites, K1016 and K1066, regulates interaction with Swi6p
YDR253C	MET32	Antisens	0.919633	No	No	NA	0.745577	Zinc-finger DNA-binding transcription factor; involved in transcriptional regulation of the methionine biosynthetic genes; targets strong transcriptional activator Met4p to promoters of sulfur metabolic genes; feedforward loop exists in the regulation of genes controlled by Met4p and Met32p; lack of such a loop for MET31 may account for the differential actions of Met32p and Met31p; MET32 has a p…
YCR065W	HCM1	Antisens	0.91963	No	No	NA	0.562018	Forkhead transcription factor; drives S-phase specific expression of genes involved in chromosome segregation, spindle dynamics, and budding; suppressor of calmodulin mutants with specific SPB assembly defects; telomere maintenance role
YGL028C	SCW11	PCG	0.919616	No	No	3.9	-0.44995	Cell wall protein with similarity to glucanases; may play a role in conjugation during mating based on its regulation by Ste12p
YIL125W	KGD1	PCG	0.919604	No	No	0.9	0.55415	Subunit of the mitochondrial alpha-ketoglutarate dehydrogenase complex; catalyzes a key step in the tricarboxylic acid (TCA) cycle, the oxidative decarboxylation of alpha-ketoglutarate to form succinyl-CoA
YMR196W	YMR196W	Antisens	0.919599	No	No	NA	1.04032	Putative protein of unknown function; green fluorescent protein (GFP)-fusion protein localizes to the cytoplasm; YMR196W is not an essential gene
YEL037C	RAD23	Antisens	0.919592	No	No	NA	0.158169	Protein with ubiquitin-like N terminus; subunit of Nuclear Excision Repair Factor 2 (NEF2) with Rad4p that binds damaged DNA; enhances protein deglycosylation activity of Png1p; also involved, with Rad4p, in ubiquitylated protein turnover
YBR043C	QDR3	PCG	0.919579	No	No	0.86	0.742951	Multidrug transporter of the major facilitator superfamily; member of the 12-spanner drug:H(+) antiporter DHA1 family; has a role in polyamine homeostasis; involved in spore wall asembly; sequence similarity to DTR1 and QDR1, and the triple mutant dtr1 qdr1 qdr3 exhibits reduced dityrosine fluorescence relative to the single mutants; expression is upregulated under polyamine stress; required for …
YBR031W	RPL4A	Antisens	0.919558	No	No	NA	-0.878994	Ribosomal 60S subunit protein L4A; N-terminally acetylated; homologous to mammalian ribosomal protein L4 and bacterial L4; RPL4A has a paralog, RPL4B, that arose from the whole genome duplication
YDR012W	RPL4B	Antisens	0.919558	No	No	NA	-0.847367	Ribosomal 60S subunit protein L4B; homologous to mammalian ribosomal protein L4 and bacterial L4; RPL4B has a paralog, RPL4A, that arose from the whole genome duplication
chrX_223463_224911	chrX_223463_224911	Intergenic	0.919522	No	No	NA	NA	NA
YLR397C	AFG2	Antisens	0.919497	No	No	NA	0.442455	ATPase of the CDC48/PAS1/SEC18 (AAA) family, forms a hexameric complex; is essential for pre-60S maturation and release of several preribosome maturation factors; releases Rlp24p from purified pre-60S particles in vitro; may be involved in degradation of aberrant mRNAs
YMR164C	MSS11	PCG	0.919429	No	No	0.3	0.867085	Transcription factor; involved in regulation of invasive growth and starch degradation; controls the activation of FLO11 and STA2 in response to nutritional signals
YEL017W	GTT3	Antisens	0.919422	No	No	NA	0.0862624	Protein of unknown function may be involved in glutathione metabolism; function suggested by computational analysis of large-scale protein-protein interaction data; GFP-fusion protein localizes to the nuclear periphery
YOR237W	HES1	Antisens	0.919415	No	No	NA	0.709199	Protein implicated in the regulation of ergosterol biosynthesis; one of a seven member gene family with a common essential function and non-essential unique functions; similar to human oxysterol binding protein (OSBP); HES1 has a paralog, KES1, that arose from the whole genome duplication
YDR045C	RPC11	PCG	0.919363	No	No	5.3	0.746929	RNA polymerase III subunit C11; mediates pol III RNA cleavage activity and is important for termination of transcription; homologous to TFIIS
YDR484W	VPS52	Antisens	0.919339	No	No	NA	0.920018	Component of the GARP (Golgi-associated retrograde protein) complex; this complex is required for the recycling of proteins from endosomes to the late Golgi; involved in localization of actin and chitin; members of the GARP complex are Vps51p-Vps52p-Vps53p-Vps54p
YLR403W	SFP1	Antisens	0.919334	No	No	NA	0.729509	Regulates transcription of ribosomal protein and biogenesis genes; regulates response to nutrients and stress, G2/M transitions during mitotic cell cycle and DNA-damage response, and modulates cell size; regulated by TORC1 and Mrs6p; sequence of zinc finger, ChIP localization data, and protein-binding microarray (PBM) data, and computational analyses suggest it binds DNA directly at highly active…
YIL140W	AXL2	Antisens	0.919297	No	No	NA	0.864221	Integral plasma membrane protein; required for axial budding in haploid cells; localizes to the incipient bud site and bud neck; glycosylated by Pmt4p; potential Cdc28p substrate
YJL056C	ZAP1	PCG	0.919239	No	No	1.21	0.59328	Zinc-regulated transcription factor; binds to zinc-responsive promoters to induce transcription of certain genes in presence of zinc, represses other genes in low zinc; regulates its own transcription; contains seven zinc-finger domains
YNR023W	SNF12	PCG	0.919056	No	No	0.4	0.86425	73 kDa subunit of the SWI/SNF chromatin remodeling complex; involved in transcriptional regulation; relocates to the cytosol under hypoxic conditions; deletion mutants are temperature-sensitive; SNF12 has a paralog, RSC6, that arose from the whole genome duplication
YKL191W	DPH2	PCG	0.919048	No	No	3.29	0.0213159	Protein required for synthesis of diphthamide; required along with Dph1p, Kti11p, Jjj3p, and Dph5p; diphthamide is a modified histidine residue of translation elongation factor 2 (Eft1p or Eft2p); may act in a complex with Dph1p and Kti11p
YPL212C	PUS1	PCG	0.918812	No	No	1.59	0.240547	tRNA:pseudouridine synthase; introduces pseudouridines at positions 26-28, 34-36, 65, and 67 of tRNA; nuclear protein that appears to be involved in tRNA export; also acts on U2 snRNA; PUS1 has a paralog, PUS2, that arose from the whole genome duplication
YLR172C	DPH5	Antisens	0.918803	No	No	NA	0.269457	Methyltransferase required for synthesis of diphthamide; diphthamide is a modified histidine residue of translation elongation factor 2 (Eft1p or Eft2p); not essential for viability; GFP-Dph5p fusion protein localizes to the cytoplasm
YDR195W	REF2	PCG	0.9188	No	No	0.6	0.567571	RNA-binding protein; involved in the cleavage step of mRNA 3'-end formation prior to polyadenylation, and in snoRNA maturation; part of holo-CPF subcomplex APT, which associates with 3'-ends of snoRNA- and mRNA-encoding genes; relocalizes to the cytosol in response to hypoxia
YKL029C	MAE1	Antisens	0.918781	No	No	NA	-0.392995	Mitochondrial malic enzyme; catalyzes the oxidative decarboxylation of malate to pyruvate, which is a key intermediate in sugar metabolism and a precursor for synthesis of several amino acids
YNL163C	RIA1	PCG	0.918748	No	No	1.1	0.256682	Cytoplasmic GTPase/eEF2-like factor involved in ribosomal biogenesis; with Sdo1p, a guanine nucleotide exchange factor (GEF), promotes release of Tif6p from 60S ribosomal subunits in the cytoplasm so that they can assemble with 40S subunits to generate mature ribosomes; required for quality control check of newly made large ribosomal subunits before they are released into the pool of translating …
YOR379C	YOR379C	PCG	0.918665	No	No	0.1	0.752568	Dubious open reading frame; unlikely to encode a functional protein, based on available experimental and comparative sequence data; partially overlaps the uncharacterized ORF YOR378W
YJL045W	YJL045W	Antisens	0.918648	No	No	NA	0.735995	Minor succinate dehydrogenase isozyme; participates in oxidation of succinate and transfer of electrons to ubiquinone; induced during the diauxic shift in a Cat8p-dependent manner; YJL045W has a paralog, SDH1, that arose from the whole genome duplication
YHL028W	WSC4	PCG	0.918639	No	No	1.35	0.710404	Endoplasmic reticulum (ER) membrane protein; involved in the translocation of soluble secretory proteins and insertion of membrane proteins into the ER membrane; may also have a role in the stress response but has only partial functional overlap with WSC1-3
YDR444W	YDR444W	Antisens	0.918636	No	No	NA	0.533531	Putative hydrolase acting on ester bonds
YGL214W	YGL214W	Antisens	0.918633	No	No	NA	0.553378	Dubious open reading frame; unlikely to encode a functional protein, based on available experimental and comparative sequence data; deletion mutation phenotype is likely due to the overlapping verified ORF SKI8/YGL213C
YNL312W	RFA2	PCG	0.91862	No	No	2.84	0.298013	Subunit of heterotrimeric Replication Protein A (RPA); RPA is a highly conserved single-stranded DNA binding protein involved in DNA replication, repair, and recombination; in concert with Sgs1p-Top2p-Rmi1p, stimulates DNA catenation/decatenation activity of Top3p; protein abundance increases in response to DNA replication stress
YHR132W-A	IGO2	Antisens	0.918554	No	No	NA	0.382601	Protein required for initiation of G0 program; prevents degradation of nutrient-regulated mRNAs via the 5'-3' mRNA decay pathway; phosphorylated by Rim15p; GFP protein localizes to the cytoplasm and nucleus; IGO2 has a paralog, IGO1, that arose from the whole genome duplication
YAR007C	RFA1	Antisens	0.918539	No	No	NA	0.502189	Subunit of heterotrimeric Replication Protein A (RPA); which is a highly conserved single-stranded DNA binding protein involved in DNA replication, repair, and recombination; role in DNA catenation/decatenation pathway of chromosome disentangling; relocalizes to the cytosol in response to hypoxia
YER073W	ALD5	Antisens	0.918535	No	No	NA	-0.271467	Mitochondrial aldehyde dehydrogenase; involved in regulation or biosynthesis of electron transport chain components and acetate formation; activated by K+; utilizes NADP+ as the preferred coenzyme; constitutively expressed
YGL035C	MIG1	Antisens	0.918446	No	No	NA	0.494191	Transcription factor involved in glucose repression; sequence specific DNA binding protein containing two Cys2His2 zinc finger motifs; regulated by the SNF1 kinase and the GLC7 phosphatase; regulates filamentous growth along with Mig2p in response to glucose depletion; shuttles between cytosol and nucleus depending on external glucose levels and its phosphorylation state
YCR061W	YCR061W	Antisens	0.918362	No	No	NA	0.948954	Protein of unknown function; green fluorescent protein (GFP)-fusion protein localizes to the cytoplasm in a punctate pattern; induced by treatment with 8-methoxypsoralen and UVA irradiation
YMR055C	BUB2	Antisens	0.918358	No	No	NA	0.888048	Mitotic exit network regulator; forms GTPase-activating Bfa1p-Bub2p complex that binds Tem1p and spindle pole bodies, blocks cell cycle progression before anaphase in response to spindle and kinetochore damage
YNL192W	CHS1	PCG	0.918351	No	No	1.71	1.31119	Chitin synthase I; requires activation from zymogenic form in order to catalyze the transfer of N-acetylglucosamine (GlcNAc) to chitin; required for repairing the chitin septum during cytokinesis; transcription activated by mating factor
YHR013C	ARD1	PCG	0.918343	No	No	1.35	0.150023	Subunit of protein N-terminal acetyltransferase NatA; NatA is comprised of Nat1p, Ard1p, and Nat5p; acetylates many proteins and thus affects telomeric silencing, cell cycle, heat-shock resistance, mating, and sporulation; human Ard1p levels are elevated in cancer cells; protein abundance increases in response to DNA replication stress
YDL113C	ATG20	PCG	0.918337	No	No	0.3	0.822136	Sorting nexin family member; required for the cytoplasm-to-vacuole targeting (Cvt) pathway and for endosomal sorting; has a Phox homology domain that binds phosphatidylinositol-3-phosphate; interacts with Snx4p; potential Cdc28p substrate
chrII_423175_423619	chrII_423175_423619	Intergenic	0.91831	No	No	NA	NA	NA
YPR069C	SPE3	PCG	0.918277	No	Yes	3.18	-0.205106	Spermidine synthase; involved in biosynthesis of spermidine and also in biosynthesis of pantothenic acid; spermidine is required for growth of wild-type cells
YAL064C-A	TDA8	PCG	0.91822	No	No	NA	0.848918	Putative protein of unknown function; null mutant is sensitive to expression of the top1-T722A allele; not an essential gene
chrVII_14297_14770	chrVII_14297_14770	Intergenic	0.918197	No	No	NA	NA	NA
YFR039C	OSW7	Antisens	0.91819	No	No	NA	0.701509	Protein involved in outer spore wall assembly; likely involved directly in dityrosine layer assembly; may be involved in response to high salt and changes in carbon source; deletion mutant has decreased spore survival in Drosophila feces; OSW7 has a paralog, SHE10, that arose from the whole genome duplication; deletion of both OSW7 and SHE10 results in reduced dityrosine fluorescence from the spo…
YDR463W	STP1	Antisens	0.918144	No	No	NA	0.802818	Transcription factor; undergoes proteolytic processing by SPS (Ssy1p-Ptr3p-Ssy5p)-sensor component Ssy5p in response to extracellular amino acids; activates transcription of amino acid permease genes and may have a role in tRNA processing; STP1 has a paralog, STP2, that arose from the whole genome duplication
YJL083W	TAX4	Antisens	0.918128	No	No	NA	0.77867	EH domain-containing protein; involved in regulating phosphatidylinositol 4,5-bisphosphate levels and autophagy; Irs4p and Tax4p bind and activate the PtdIns phosphatase Inp51p; Irs4p and Tax4p are involved in localizing Atg17p to the PAS; TAX4 has a paralog, IRS4, that arose from the whole genome duplication
YNL050C	YNL050C	PCG	0.917999	No	No	1.34	0.511917	Putative protein of unknown function; YNL050c is not an essential gene
YML085C	TUB1	PCG	0.917918	No	Yes	2.6	0.160198	Alpha-tubulin; associates with beta-tubulin (Tub2p) to form tubulin dimer, which polymerizes to form microtubules; relative distribution to nuclear foci increases upon DNA replication stress; TUB1 has a paralog, TUB3, that arose from the whole genome duplication
YKL014C	URB1	PCG	0.917889	No	Yes	0.9	0.134267	Protein required for the normal accumulation of 25S and 5.8S rRNAs; nucleolar protein; associated with the 27SA2 pre-ribosomal particle; proposed to be involved in the biogenesis of the 60S ribosomal subunit
chrXIII_225505_225749	chrXIII_225505_225749	Intergenic	0.917887	No	No	NA	NA	NA
YOL111C	MDY2	PCG	0.917832	No	No	1.5	0.229473	Protein involved in inserting tail-anchored proteins into ER membranes; forms a complex with Get4p; required for efficient mating; involved in shmoo formation and nuclear migration in the pre-zygote; associates with ribosomes
YCR064C	YCR064C	PCG	0.917788	No	No	1.35	0.959328	Dubious open reading frame; unlikely to encode a functional protein, based on available experimental and comparative sequence data; partially overlaps the verified gene BUD31
YKL185W	ASH1	Antisens	0.917765	No	No	NA	0.597592	Component of the Rpd3L histone deacetylase complex; zinc-finger inhibitor of HO transcription; mRNA is localized and translated in the distal tip of anaphase cells, resulting in accumulation of Ash1p in daughter cell nuclei and inhibition of HO expression; potential Cdc28p substrate
YDR217C	RAD9	Antisens	0.917764	No	No	NA	0.490572	DNA damage-dependent checkpoint protein; required for cell-cycle arrest in G1/S, intra-S, and G2/M, plays a role in postreplication repair (PRR) pathway; transmits checkpoint signal by activating Rad53p and Chk1p; hyperphosphorylated by Mec1p and Tel1p; multiple cyclin dependent kinase consensus sites and the C-terminal BRCT domain contribute to DNA damage checkpoint activation; Rad9p Chk1 Activa…
YGR246C	BRF1	PCG	0.917729	No	No	1.31	0.662665	TFIIIB B-related factor; one of three subunits of RNA polymerase III transcription initiation factor TFIIIB, binds TFIIIC and TBP and recruits RNA pol III to promoters, amino-terminal half is homologous to TFIIB
snR41	SNR41	ncRNA	0.917718	No	Yes	NA	0.848385	C/D box small nucleolar RNA (snoRNA); guides 2'-O-methylation of small subunit (SSU) rRNA at positions A541 and G1126
YDR210W	YDR210W	PCG	0.917693	No	No	6.5	0.364621	Predicted tail-anchored plasma membrane protein; contains a conserved CYSTM module; related proteins in other organisms may be involved in response to stress; green fluorescent protein (GFP)-fusion protein localizes to the cell periphery
YPL207W	TYW1	PCG	0.917674	No	No	2.6	0.432315	Iron-sulfer protein required for synthesis of Wybutosine modified tRNA; Wybutosine is a modified guanosine found at the 3'-position adjacent to the anticodon of phenylalanine tRNA which supports reading frame maintenance by stabilizing codon-anticodon interactions; induction by Yap5p in response to iron provides protection from high iron toxicity; overexpression results in increased cellular iron
YML029W	USA1	PCG	0.917652	No	No	0.6	0.870228	Scaffold subunit of the Hrd1p ubiquitin ligase; also promotes ligase oligomerization; involved in ER-associated protein degradation (ERAD); interacts with the U1 snRNP-specific protein, Snp1p
YJL161W	FMP33	Antisens	0.917651	No	No	NA	0.8894	Putative protein of unknown function; the authentic, non-tagged protein is detected in highly purified mitochondria in high-throughput studies
YDL190C	UFD2	PCG	0.917588	No	No	1.6	0.649567	Ubiquitin chain assembly factor (E4); cooperates with a ubiquitin-activating enzyme (E1), a ubiquitin-conjugating enzyme (E2), and a ubiquitin protein ligase (E3) to conjugate ubiquitin to substrates; also functions as an E3
YBR269C	FMP21	Antisens	0.917588	No	No	NA	0.974452	Putative protein of unknown function; the authentic, non-tagged protein is detected in highly purified mitochondria in high-throughput studies
YIR003W	AIM21	PCG	0.917546	No	No	0.6	0.808601	Protein of unknown function; involved in mitochondrial migration along actin filament; may interact with ribosomes; GFP-fusion protein colocalizes with Sac1p to the actin cytoskeleton
chrVII_16447_20838	chrVII_16447_20838	Intergenic	0.917539	No	No	NA	NA	NA
YKR031C	SPO14	Antisens	0.917491	No	No	NA	0.63858	Phospholipase D; catalyzes the hydrolysis of phosphatidylcholine, producing choline and phosphatidic acid; involved in Sec14p-independent secretion; required for meiosis and spore formation; differently regulated in secretion and meiosis; participates in transcription initiation and/or early elongation of specific genes; interacts with "foot domain" of RNA polymerase II; deletion results in abnor…
YEL025C	YEL025C	PCG	0.917472	No	No	0.4	0.694877	Putative protein of unknown function; green fluorescent protein (GFP)-fusion protein localizes to both the cytoplasm and the nucleus
YBR060C	ORC2	Antisens	0.917456	No	No	NA	0.370467	Subunit of the origin recognition complex (ORC); ORC directs DNA replication by binding to replication origins and is also involved in transcriptional silencing; interacts with Spp1p and with trimethylated histone H3; phosphorylated by Cdc28p
YMR316W	DIA1	Antisens	0.917356	No	No	NA	1.64511	Protein of unknown function; involved in invasive and pseudohyphal growth; green fluorescent protein (GFP)-fusion protein localizes to the cytoplasm in a punctate pattern
YOL161C	PAU20	Antisens	0.917352	No	No	NA	0.779559	Protein of unknown function; member of the seripauperin multigene family encoded mainly in subtelomeric regions; expression induced by low temperature and also by anaerobic conditions; induced during alcoholic fermentation
chrVI_206385_206770	chrVI_206385_206770	Intergenic	0.917326	No	No	NA	NA	NA
YFL023W	BUD27	Antisens	0.917305	No	No	NA	0.440809	Unconventional prefoldin protein involved in translation initiation; required for correct assembly of RNAP I, II, and III in an Rpb5p-dependent manner; shuttles between nucleus and cytoplasm; mutants have inappropriate expression of nutrient sensitive genes due to translational derepression of Gcn4p transcription factor; diploid mutants show random budding; ortholog of human URI/RMP
YKL146W	AVT3	PCG	0.917268	No	No	2.2	0.364076	Vacuolar transporter; exports large neutral amino acids from the vacuole; member of a family of seven S. cerevisiae genes (AVT1-7) related to vesicular GABA-glycine transporters
YOR019W	YOR019W	PCG	0.917268	No	No	0.1	0.858724	Protein of unknown function; may interact with ribosomes, based on co-purification experiments; YOR019W has a paralog, JIP4, that arose from the whole genome duplication
YGR281W	YOR1	PCG	0.91722	No	Yes	1.29	0.521665	Plasma membrane ATP-binding cassette (ABC) transporter; multidrug transporter mediates export of many different organic anions including oligomycin; homolog of human cystic fibrosis transmembrane receptor (CFTR)
YMR216C	SKY1	Antisens	0.917182	No	No	NA	0.421572	SR protein kinase (SRPK); involved in regulating proteins involved in mRNA metabolism and cation homeostasis; similar to human SRPK1
YBR260C	RGD1	Antisens	0.917127	No	No	NA	0.616078	GTPase-activating protein (RhoGAP) for Rho3p and Rho4p; possibly involved in control of actin cytoskeleton organization
YKL068W-A	YKL068W-A	Antisens	0.917124	No	No	NA	0.477339	Putative protein of unknown function; identified by homology to <i>Ashbya gossypii</i>
YDL029W	ARP2	PCG	0.917071	No	No	4.96	0.148705	Essential component of the Arp2/3 complex; Arp2/3 is a highly conserved actin nucleation center required for the motility and integrity of actin patches; involved in endocytosis and membrane growth and polarity; required for efficient Golgi-to-ER trafficking in COPI mutants
YLL063C	AYT1	Antisens	0.917021	No	No	NA	0.701619	Acetyltransferase; catalyzes trichothecene 3-O-acetylation, suggesting a possible role in trichothecene biosynthesis
YHR084W	STE12	Antisens	0.916987	No	No	NA	0.389431	Transcription factor that is activated by a MAPK signaling cascade; activates genes involved in mating or pseudohyphal/invasive growth pathways; cooperates with Tec1p transcription factor to regulate genes specific for invasive growth
YMR128W	ECM16	Antisens	0.916963	No	No	NA	0.212761	Essential DEAH-box ATP-dependent RNA helicase specific to U3 snoRNP; predominantly nucleolar in distribution; required for 18S rRNA synthesis
YCR011C	ADP1	PCG	0.916958	No	Yes	1.21	0.767521	Putative ATP-dependent permease of the ABC transporter family
YGR071C	ENV11	PCG	0.916916	No	No	0.6	0.622422	Protein proposed to be involved in vacuolar functions; mutant shows defect in CPY processing and fragmented vacuoles; deletion mutant has increased glycogen accumulation and displays elongated buds; green fluorescent protein (GFP)-fusion protein localizes to the nucleus; ENV11 has a paralog, VID22, that arose from the whole genome duplication
YGR094W	VAS1	PCG	0.916899	No	Yes	6.5	-0.652207	Mitochondrial and cytoplasmic valyl-tRNA synthetase
YGL159W	YGL159W	Antisens	0.916889	No	No	NA	0.649092	Putative protein of unknown function; deletion mutant has no detectable phenotype
chrVII_1065086_1067088	chrVII_1065086_1067088	Intergenic	0.916862	No	No	NA	NA	NA
tW(CCA)G1	tW(CCA)G1	Antisens	0.916767	No	No	NA	NA	Tryptophan tRNA (tRNA-Trp), predicted by tRNAscan-SE analysis
YGR048W	UFD1	Antisens	0.916708	No	No	NA	0.813757	Substrate-recruiting cofactor of the Cdc48p-Npl4p-Ufd1p segregase; polyubiquitin binding protein that assists in the dislocation of misfolded, ERAD substrates that are subsequently delivered to the proteasome for degradation; involved in regulated destruction of ER membrane proteins such as HMG-CoA reductase (Hmg1/2p) and cytoplasmic proteins (Fbp1p); involved in mobilizing membrane bound transac…
YMR189W	GCV2	Antisens	0.916675	No	No	NA	0.793009	P subunit of the mitochondrial glycine decarboxylase complex; glycine decarboxylase is required for the catabolism of glycine to 5,10-methylene-THF; expression is regulated by levels of 5,10-methylene-THF in the cytoplasm
YBR094W	PBY1	Antisens	0.916656	No	No	NA	0.497015	Putative tubulin tyrosine ligase associated with P-bodies; forms cytoplasmic foci upon DNA replication stress
YJR046W	TAH11	Antisens	0.916619	No	No	NA	0.590714	DNA replication licensing factor; required for pre-replication complex assembly
YDR198C	RKM2	PCG	0.916601	No	No	0.4	0.655911	Ribosomal protein lysine methyltransferase; responsible for trimethylation of the lysine residue at position 3 of Rpl12Ap and Rpl12Bp
YPR118W	MRI1	Antisens	0.916595	No	No	NA	0.0628532	5'-methylthioribose-1-phosphate isomerase; catalyzes the isomerization of 5-methylthioribose-1-phosphate to 5-methylthioribulose-1-phosphate in the methionine salvage pathway
YLR037C	PAU23	Antisens	0.916479	No	No	NA	0.761184	Cell wall mannoprotein; has similarity to Tir1p, Tir2p, Tir3p, and Tir4p; member of the seripauperin multigene family encoded mainly in subtelomeric regions; expressed under anaerobic conditions, completely repressed during aerobic growth
YGL135W	RPL1B	PCG	0.916468	No	No	57.49	-0.897273	Ribosomal 60S subunit protein L1B; N-terminally acetylated; homologous to mammalian ribosomal protein L10A and bacterial L1; RPL1B has a paralog, RPL1A, that arose from the whole genome duplication; rpl1a rpl1b double null mutation is lethal
YLR130C	ZRT2	Antisens	0.916443	No	No	NA	0.21286	Low-affinity zinc transporter of the plasma membrane; transcription is induced under low-zinc conditions by the Zap1p transcription factor
YIL003W	CFD1	PCG	0.916388	No	No	0.2	0.476008	Highly conserved iron-sulfur cluster binding protein; localized in the cytoplasm; forms a complex with Nbp35p that is involved in iron-sulfur protein assembly in the cytosol
YBL107W-A	YBL107W-A	PCG	0.91635	No	No	NA	NA	Dubious open reading frame; unlikely to encode a functional protein, based on available experimental and comparative sequence data; completely overlaps the Ty2 LTR YBLWdelta2; YBL107W-A has a paralog, YER138W-A, that arose from a single-locus duplication
YDR034C-C	YDR034C-C	PCG	0.91635	No	No	NA	NA	Retrotransposon TYA Gag gene co-transcribed with TYB Pol; translated as TYA or TYA-TYB polyprotein; Gag is a nucleocapsid protein that is the structural constituent of virus-like particles (VLPs); similar to retroviral Gag
YDR034C-D	YDR034C-D	PCG	0.91635	No	No	NA	1.11211	Retrotransposon TYA Gag and TYB Pol genes; transcribed/translated as one unit; polyprotein is processed to make a nucleocapsid-like protein (Gag), reverse transcriptase (RT), protease (PR), and integrase (IN); similar to retroviral genes
YBLWdelta2	YBLWdelta2	long_terminal_repeat	0.91635	No	No	NA	NA	Ty2 LTR
YBLWdelta3	YBLWdelta3	long_terminal_repeat	0.91635	No	No	NA	NA	Ty1 LTR
YDRCdelta5	YDRCdelta5	long_terminal_repeat	0.91635	No	No	NA	NA	Ty2 LTR
YGLCdelta1	YGLCdelta1	long_terminal_repeat	0.91635	No	No	NA	NA	Ty1 LTR
YJLCdelta3	YJLCdelta3	long_terminal_repeat	0.91635	No	No	NA	NA	Ty1 LTR
YGL167C	PMR1	PCG	0.916308	No	No	1.71	0.61361	High affinity Ca2+/Mn2+ P-type ATPase; required for Ca2+ and Mn2+ transport into Golgi; involved in Ca2+ dependent protein sorting and processing; mutations in human homolog ATP2C1 cause acantholytic skin condition Hailey-Hailey disease
YBL045C	COR1	PCG	0.916284	No	No	3.16	1.04053	Core subunit of the ubiquinol-cytochrome c reductase complex; the ubiquinol-cytochrome c reductase complex (bc1 complex) is a component of the mitochondrial inner membrane electron transport chain
YNL068C	FKH2	Antisens	0.916254	No	No	NA	0.478004	Forkhead family transcription factor; plays a major role in the expression of G2/M phase genes; positively regulates transcriptional elongation; facilitates clustering and activation of early-firing replication origins; negative role in chromatin silencing at HML and HMR; substrate of the Cdc28p/Clb5p kinase; relocalizes to the cytosol in response to hypoxia; FKH2 has a paralog, FKH1, that arose …
YBR080C	SEC18	PCG	0.916246	No	Yes	1	0.389433	AAA ATPase and SNARE disassembly chaperone; required for vesicular transport between ER and Golgi, the 'priming' step in homotypic vacuole fusion, autophagy, and protein secretion; releases Sec17p from SNAP complexes; has similarity to mammalian N-ethylmaleimide-sensitive factor (NSF)
YGR175C	ERG1	PCG	0.916201	No	No	8.34	0.200552	Squalene epoxidase; catalyzes the epoxidation of squalene to 2,3-oxidosqualene; plays an essential role in the ergosterol-biosynthesis pathway and is the specific target of the antifungal drug terbinafine
YOR060C	SLD7	Antisens	0.916195	No	No	NA	0.813966	Protein with a role in chromosomal DNA replication; interacts with Sld3p and reduces its affinity for Cdc45p; deletion mutant has aberrant mitochondria
YMR232W	FUS2	PCG	0.916187	No	No	0.2	0.796589	Cell fusion regulator; cytoplasmic protein localized to shmoo tip; required for alignment of parental nuclei before nuclear fusion during mating; contains a Dbl-homology domain; binds specifically with activated Cdc42p
YBR140C	IRA1	PCG	0.916093	No	Yes	0.86	0.617352	GTPase-activating protein; negatively regulates RAS by converting it from the GTP- to the GDP-bound inactive form, required for reducing cAMP levels under nutrient limiting conditions, mediates membrane association of adenylate cyclase; IRA1 has a paralog, IRA2, that arose from the whole genome duplication
YDR310C	SUM1	Antisens	0.916067	No	No	NA	0.414964	Transcriptional repressor that regulates middle-sporulation genes; required for mitotic repression of middle sporulation-specific genes; also acts as general replication initiation factor; involved in telomere maintenance, chromatin silencing; regulated by pachytene checkpoint
chrVIII_4680_5522	chrVIII_4680_5522	Intergenic	0.916052	No	No	NA	NA	NA
YOR197W	MCA1	Antisens	0.916011	No	No	NA	0.225538	Ca2+-dependent cysteine protease; may cleave specific substrates during the stress response; regulates apoptosis upon H2O2 treatment; required for clearance of insoluble protein aggregates during normal growth; implicated in cell cycle dynamics; undergoes autocatalytic processing; similar to mammalian metacaspases, but exists as a monomer due to an extra pair of anti-parallel beta-strands that fo…
YFR015C	GSY1	Antisens	0.916006	No	No	NA	0.980564	Glycogen synthase; expression induced by glucose limitation, nitrogen starvation, environmental stress, and entry into stationary phase; GSY1 has a paralog, GSY2, that arose from the whole genome duplication; relocalizes from nucleus to cytoplasmic foci upon DNA replication stress
YOL045W	PSK2	PCG	0.915951	No	Yes	0.4	0.447897	PAS-domain containing serine/threonine protein kinase; regulates sugar flux and translation in response to an unknown metabolite by phosphorylating Ugp1p and Gsy2p (sugar flux) and Caf20p, Tif11p and Sro9p (translation); PSK2 has a paralog, PSK1, that arose from the whole genome duplication
YGLWdelta3	YGLWdelta3	long_terminal_repeat	0.9159	No	No	NA	NA	Ty1 LTR
tK(UUU)G1	tK(UUU)G1	ncRNA	0.9159	No	No	NA	NA	Lysine tRNA (tRNA-Lys), predicted by tRNAscan-SE analysis; thiolation of uridine at wobble position (34) requires Ncs6p
tT(UGU)G2	tT(UGU)G2	Antisens	0.915845	No	No	NA	NA	Threonine tRNA (tRNA-Thr), predicted by tRNAscan-SE analysis
YMR209C	YMR209C	Antisens	0.915834	No	No	NA	0.624772	Putative S-adenosylmethionine-dependent methyltransferase; YMR209C is not an essential gene
YNR016C	ACC1	PCG	0.915833	No	Yes	4.05	-0.420354	Acetyl-CoA carboxylase, biotin containing enzyme; catalyzes carboxylation of cytosolic acetyl-CoA to form malonyl-CoA and regulates histone acetylation by regulating the availablity of acetyl-CoA; required for de novo biosynthesis of long-chain fatty acids; ACC1 has a paralog, HFA1, that arose from the whole genome duplication
YMR231W	PEP5	Antisens	0.915824	No	No	NA	0.522546	Histone E3 ligase, component of CORVET tethering complex; peripheral vacuolar membrane protein required for protein trafficking and vacuole biogenesis; interacts with Pep7p; involved in ubiquitylation and degradation of excess histones
YBR177C	EHT1	PCG	0.91582	No	No	1.39	0.831856	Acyl-coenzymeA:ethanol O-acyltransferase; plays a minor role in medium-chain fatty acid ethyl ester biosynthesis; possesses short-chain esterase activity; localizes to lipid particles and the mitochondrial outer membrane; EHT1 has a paralog, EEB1, that arose from the whole genome duplication
YLR363C	NMD4	PCG	0.915808	No	No	0.3	0.678907	Protein that may be involved in nonsense-mediated mRNA decay; interacts with Nam7p, relocalizes from nucleus to cytoplasmic foci upon DNA replication stress
chrXI_345404_345579	chrXI_345404_345579	Intergenic	0.915764	No	No	NA	NA	NA
YMR218C	TRS130	PCG	0.915729	No	No	0.68	0.680586	Component of transport protein particle (TRAPP) complex II; TRAPPII is a multimeric guanine nucleotide-exchange factor for the GTPase Ypt1p, regulating intra-Golgi and endosome-Golgi traffic
YGL040C	HEM2	PCG	0.91569	No	No	3.04	0.233716	Aminolevulinate dehydratase; a homo-octameric enzyme, catalyzes the conversion of 5-aminolevulinate to porphobilinogen, the second step in heme biosynthesis; enzymatic activity is zinc-dependent; localizes to the cytoplasm and nucleus
YBL086C	YBL086C	Antisens	0.915645	No	No	NA	0.790227	Protein of unknown function; green fluorescent protein (GFP)-fusion protein localizes to the cell periphery
chrVIII_553642_554256	chrVIII_553642_554256	Intergenic	0.915599	No	No	NA	NA	NA
YCR073C	SSK22	Antisens	0.915597	No	No	NA	0.726811	MAP kinase kinase kinase of HOG1 mitogen-activated signaling pathway; functionally redundant with Ssk2p; interacts with and is activated by Ssk1p; phosphorylates Pbs2p; SSK22 has a paralog, SSK2, that arose from the whole genome duplication
YMR247C	RKR1	PCG	0.91558	No	No	NA	0.586539	RING domain E3 ubiquitin ligase; involved in ubiquitin-mediated degradation of non-stop proteins; component of ribosome-bound RQC (ribosome quality control) complex required for degradation of polypeptides arising from stalled translation; degrades products of mRNAs lacking a termination codon regardless of a poly(A) tail; functional connections to chromatin modification; homolog of mouse Listeri…
YNL200C	YNL200C	Antisens	0.915575	No	No	NA	0.983302	NADHX epimerase; catalyzes isomerization of (R)- and (S)-NADHX; homologous to AIBP in mammals and the N- terminal domain of YjeF in E.coli; enzyme is widespread in eukaryotes, prokaryotes and archaea; the authentic, non-tagged protein is detected in highly purified mitochondria in high-throughput studies
YKL209C	STE6	Antisens	0.915569	No	No	NA	0.553969	Plasma membrane ATP-binding cassette (ABC) transporter; required for the export of a-factor, catalyzes ATP hydrolysis coupled to a-factor transport; contains 12 transmembrane domains and two ATP binding domains; expressed only in MATa cells
YBR067C	TIP1	PCG	0.915487	No	No	10.7	0.212361	Major cell wall mannoprotein with possible lipase activity; transcription is induced by heat- and cold-shock; member of the Srp1p/Tip1p family of serine-alanine-rich proteins
YDR141C	DOP1	PCG	0.915418	No	No	0.7	0.694409	Golgi-localized, leucine-zipper domain containing protein; involved in endosome to Golgi transport, organization of the ER, establishing cell polarity, and morphogenesis; detected in highly purified mitochondria in high-throughput studies
YMR019W	STB4	Antisens	0.915392	No	No	NA	0.825129	Putative transcription factor; contains a Zn(II)2Cys6 zinc finger domain characteristic of DNA-binding proteins; computational analysis suggests a role in regulation of expression of genes encoding transporters; binds Sin3p in a two-hybrid assay;
YKL215C	OXP1	Antisens	0.915383	No	No	NA	0.485949	5-oxoprolinase; enzyme is ATP-dependent and functions as a dimer; similar to mouse Oplah gene; green fluorescent protein (GFP)-fusion protein localizes to the cytoplasm; protein abundance increases in response to DNA replication stress
YER126C	NSA2	PCG	0.915371	No	No	3.4	0.235981	Protein constituent of 66S pre-ribosomal particles; contributes to processing of the 27S pre-rRNA
YHR034C	PIH1	Antisens	0.915344	No	No	NA	0.564198	Component of the conserved R2TP complex (Rvb1-Rvb2-Tah1-Pih1); R2TP complex interacts with Hsp90 (Hsp82p and Hsc82p) to mediate assembly large protein complexes such as box C/D snoRNPs and RNA polymerase II
YDR458C	HEH2	Antisens	0.915341	No	No	NA	0.671947	Inner nuclear membrane (INM) protein; contains helix-extension-helix (HEH) motif, nuclear localization signal sequence; targeting to the INM requires the Srp1p-Kap95p karyopherins and the Ran cycle; HEH2 has a paralog, SRC1, that arose from the whole genome duplication
YGR085C	RPL11B	PCG	0.915335	No	No	52	-0.276754	Ribosomal 60S subunit protein L11B; expressed at half the level of Rpl11Ap; involved in ribosomal assembly; depletion causes degradation of 60S proteins and RNA; homologous to mammalian ribosomal protein L11 and bacterial L5; RPL11B has a paralog, RPL11A, that arose from the whole genome duplication
YPL161C	BEM4	PCG	0.915312	No	No	0.4	0.672721	Protein involved in establishment of cell polarity and bud emergence; interacts with the Rho1p small GTP-binding protein and with the Rho-type GTPase Cdc42p; involved in maintenance of proper telomere length
YBR261C	TAE1	PCG	0.915247	No	No	1.63	0.456325	AdoMet-dependent proline methyltransferase; catalyzes the dimethylation of ribosomal proteins Rpl12 and Rps25 at N-terminal proline residues; has a role in protein synthesis; fusion protein localizes to the cytoplasm
YGR091W	PRP31	PCG	0.915229	No	No	0.2	0.761264	Splicing factor; component of the U4/U6-U5 snRNP complex
YNL273W	TOF1	PCG	0.915228	No	No	0.4	0.590461	Subunit of a replication-pausing checkpoint complex; Tof1p-Mrc1p-Csm3p acts at the stalled replication fork to promote sister chromatid cohesion after DNA damage, facilitating gap repair of damaged DNA; interacts with the MCM helicase; relocalizes to the cytosol in response to hypoxia
YOR033C	EXO1	PCG	0.915168	No	No	1.45	0.608517	5'-3' exonuclease and flap-endonuclease; involved in recombination, double-strand break repair, MMS2 error-free branch of the post replication (PRR) pathway and DNA mismatch repair; role in telomere maintenance; member of the Rad2p nuclease family, with conserved N and I nuclease domains; relative distribution to the nucleus increases upon DNA replication stress; EXO1 has a paralog, DIN7, that ar…
YJR105W	ADO1	PCG	0.915165	No	No	9.21	-0.368636	Adenosine kinase; required for the utilization of S-adenosylmethionine (AdoMet); may be involved in recycling adenosine produced through the methyl cycle
YIL074C	SER33	PCG	0.915143	No	No	1.38	0.266947	3-phosphoglycerate dehydrogenase; catalyzes the first step in serine and glycine biosynthesis; SER33 has a paralog, SER3, that arose from the whole genome duplication
YOR283W	YOR283W	PCG	0.91514	No	No	2.9	0.19983	Phosphatase with a broad substrate specificity; has some similarity to GPM1/YKL152C, a phosphoglycerate mutase; YOR283W is not an essential gene
YDR146C	SWI5	Antisens	0.91512	No	No	NA	0.704794	Transcription factor that recruits Mediator and Swi/Snf complexes; activates transcription of genes expressed at the M/G1 phase boundary and in G1 phase; required for expression of the HO gene controlling mating type switching; localization to nucleus occurs during G1 and appears to be regulated by phosphorylation by Cdc28p kinase; SWI5 has a paralog, ACE2, that arose from the whole genome duplic…
YOR316C	COT1	PCG	0.915082	No	Yes	0.7	0.851633	Vacuolar transporter that mediates zinc transport into the vacuole; overexpression confers resistance to cobalt and rhodium; protein abundance increases in response to DNA replication stress; COT1 has a paralog, ZRC1, that arose from the whole genome duplication
YOR316C-A	YOR316C-A	PCG	0.915082	No	No	NA	0.659465	Putative protein of unknown function; identified by fungal homology and RT-PCR
YMR275C	BUL1	PCG	0.91507	No	No	0.6	0.344386	Ubiquitin-binding component of the Rsp5p E3-ubiquitin ligase complex; disruption causes temperature-sensitive growth, overexpression causes missorting of amino acid permeases; BUL1 has a paralog, BUL2, that arose from the whole genome duplication
YOL120Ci	RPL18Ai	PCG (intron)	0.915054	No	Yes	NA	1.51397	NA
YNL018C	YNL018C	PCG	0.915033	No	No	1.49	0.733217	Putative protein of unknown function; YNL018C has a paralog, YNL034W, that arose from a segmental duplication
YMR290C	HAS1	PCG	0.915021	No	Yes	1.64	-0.00476637	ATP-dependent RNA helicase; involved in the biogenesis of 40S and 60S ribosome subunits; localizes to both the nuclear periphery and nucleolus; highly enriched in nuclear pore complex fractions; constituent of 66S pre-ribosomal particles
YCR021C	HSP30	PCG	0.914978	No	No	0.3	0.874006	Negative regulator of the H(+)-ATPase Pma1p; stress-responsive protein; hydrophobic plasma membrane localized; induced by heat shock, ethanol treatment, weak organic acid, glucose limitation, and entry into stationary phase
chrVII_560138_560546	chrVII_560138_560546	Intergenic	0.914955	No	No	NA	NA	NA
YPR047W	MSF1	PCG	0.914931	No	No	0.3	0.749613	Mitochondrial phenylalanyl-tRNA synthetase; active as a monomer, unlike the cytoplasmic subunit which is active as a dimer complexed to a beta subunit dimer; similar to the alpha subunit of E. coli phenylalanyl-tRNA synthetase
YFR002W	NIC96	PCG	0.914859	No	No	0.8	0.450799	Linker nucleoporin component of the nuclear pore complex (NPC); also part of the NPC nuclear basket; contributes to nucleocytoplasmic transport and NPC biogenesis; forms stable associations with three FG-nucleoporins (Nsp1p, Nup57p, and Nup49p)
chrXIII_97511_97801	chrXIII_97511_97801	Intergenic	0.914822	No	No	NA	NA	NA
YOR256C	TRE2	Antisens	0.914797	No	No	NA	0.80554	Transferrin receptor-like protein; functions with Tre1p to regulate ubiquitylation and vacuolar degradation of the metal transporter Smf1p; inviability of null mutant in systematic studies is due to proximity to CDC31; TRE2 has a paralog, TRE1, that arose from the whole genome duplication
chrXVI_828276_829774	chrXVI_828276_829774	Intergenic	0.914785	No	No	NA	NA	NA
YKR070W	YKR070W	PCG	0.914759	No	No	1.6	0.306073	Putative protein of unknown function; the authentic, non-tagged protein is detected in highly purified mitochondria in high-throughput studies
YAL046C	AIM1	PCG	0.914758	No	No	0.8	0.356644	Protein involved in mitochondrial function or organization; null mutant displays elevated frequency of mitochondrial genome loss
YKR060W	UTP30	PCG	0.914726	No	Yes	1.6	0.511933	Putative subunit of U3-containing 90S preribosome complex; complex is involved in production of 18S rRNA and assembly of small ribosomal subunit
YBR126C	TPS1	PCG	0.914694	No	Yes	3.01	0.730069	Synthase subunit of trehalose-6-P synthase/phosphatase complex; synthesizes the storage carbohydrate trehalose; also found in a monomeric form; expression is induced by the stress response and repressed by the Ras-cAMP pathway; protein abundance increases in response to DNA replication stress and in response to prolonged exposure to boric acid
chrXI_259315_260636	chrXI_259315_260636	Intergenic	0.914634	No	No	NA	NA	NA
YDR115W	YDR115W	PCG	0.914588	No	No	2.11	0.27567	Putative mitochondrial ribosomal protein of the large subunit; similar to E. coli L34 ribosomal protein; required for respiratory growth, as are most mitochondrial ribosomal proteins; protein increases in abundance and relocalizes to the plasma membrane upon DNA replication stress
YLL029W	FRA1	Antisens	0.914584	No	No	NA	0.717837	Protein involved in negative regulation of iron regulon transcription; forms an iron independent complex with Fra2p, Grx3p, and Grx4p; cytosolic; mutant fails to repress transcription of iron regulon and is defective in spore formation
YFL036W	RPO41	Antisens	0.914575	No	No	NA	0.341768	Mitochondrial RNA polymerase; single subunit enzyme similar to those of T3 and T7 bacteriophages; requires a specificity subunit encoded by MTF1 for promoter recognition; Mtf1p interacts with and stabilizes the Rpo41p-promoter complex, enhancing DNA bending and melting to facilitate pre-initiation open complex formation
chrV_449714_450418	chrV_449714_450418	Intergenic	0.914548	No	No	NA	NA	NA
YGL197W	MDS3	PCG	0.914536	No	No	0.4	0.887106	Putative component of the TOR regulatory pathway; negative regulator of early meiotic gene expression; required, with Pmd1p, for growth under alkaline conditions; has an N-terminal kelch-like domain; MDS3 has a paralog, PMD1, that arose from the whole genome duplication
YPL152W-A	YPL152W-A	Antisens	0.914528	No	No	NA	0.711763	Protein of unknown function; identified by gene-trapping, microarray-based expression analysis, and genome-wide homology searching
YMR162C	DNF3	Antisens	0.914503	No	No	NA	0.814004	Trans-golgi network aminophospholipid translocase (flippase); maintains membrane lipid asymmetry in post-Golgi secretory vesicles; localizes to the trans-Golgi network; likely involved in protein transport; type 4 P-type ATPase
YBR202W	MCM7	Antisens	0.914495	No	No	NA	0.615213	Component of the Mcm2-7 hexameric helicase complex; MCM2-7 primes origins of DNA replication in G1 and becomes an active ATP-dependent helicase that promotes DNA melting and elongation in S-phase; forms an Mcm4p-6p-7p subcomplex
YOR290C	SNF2	PCG	0.914469	No	Yes	0.6	0.400363	Catalytic subunit of the SWI/SNF chromatin remodeling complex; involved in transcriptional regulation; contains DNA-stimulated ATPase activity; functions interdependently in transcriptional activation with Snf5p and Snf6p
YBR016W	YBR016W	Antisens	0.914439	No	No	NA	0.831312	Tail-anchored plasma membrane protein with a conserved CYSTM module; predicted to be palmitoylated; has similarity to hydrophilins, which are involved in the adaptive response to hyperosmotic conditions; YBR016W has a paralog, YDL012C, that arose from the whole genome duplication
YMR010W	YMR010W	PCG	0.914402	No	No	1.39	0.34471	Putative protein of unknown function; green fluorescent protein (GFP)-fusion protein localizes to the cytoplasm; YMR010W is not an essential gene; YMR010W mRNA is transcribed with ADI1
YDL037C	BSC1	Antisens	0.914397	No	No	NA	-0.352336	Protein of unconfirmed function; similar to cell surface flocculin Flo11p; ORF exhibits genomic organization compatible with a translational readthrough-dependent mode of expression
YBR142W	MAK5	PCG	0.914379	No	No	2.6	0.0368822	Essential nucleolar protein; putative DEAD-box RNA helicase required for maintenance of M1 dsRNA virus; involved in biogenesis of large (60S) ribosomal subunits
YLL057C	JLP1	PCG	0.914374	No	No	3.17	0.789802	Fe(II)-dependent sulfonate/alpha-ketoglutarate dioxygenase; involved in sulfonate catabolism for use as a sulfur source; contains sequence that resembles a J domain (typified by the E. coli DnaJ protein); induced by sulphur starvation
YJL208C	NUC1	PCG	0.914364	No	No	0.83	0.268619	Major mitochondrial nuclease; has RNAse and DNA endo- and exonucleolytic activities; roles in mitochondrial recombination, apoptosis and maintenance of polyploidy; involved in fragmentation of genomic DNA during PND (programmed nuclear destruction); encodes ortholog of mammalian endoG
YDL035C	GPR1	Antisens	0.914344	No	No	NA	0.635667	Plasma membrane G protein coupled receptor (GPCR); interacts with the heterotrimeric G protein alpha subunit, Gpa2p, and with Plc1p; sensor that integrates nutritional signals with the modulation of cell fate via PKA and cAMP synthesis
YOR168W	GLN4	Antisens	0.914303	No	No	NA	-0.484078	Glutamine tRNA synthetase; monomeric class I tRNA synthetase that catalyzes the specific glutaminylation of tRNA(Glu); N-terminal domain proposed to be involved in enzyme-tRNA interactions
YJR136C	TTI2	Antisens	0.914298	No	No	NA	0.582921	Subunit of the ASTRA complex, involved in chromatin remodeling; telomere length regulator involved in the stability or biogenesis of PIKKs such as TORC1; similar to S. pombe Tti2p; may interact with Rsm23p; GFP-fusion protein localizes to the cytoplasm
YGL140C	YGL140C	PCG	0.914266	No	Yes	0.6	0.646052	Putative protein of unknown function; non-essential gene; contains multiple predicted transmembrane domains
YBR029C	CDS1	Antisens	0.914264	No	No	NA	0.108784	Phosphatidate cytidylyltransferase (CDP-diglyceride synthetase); an enzyme that catalyzes that conversion of CTP + phosphate into diphosphate + CDP-diaclglyerol, a critical step in the synthesis of all major yeast phospholipids
YGR061C	ADE6	PCG	0.914212	No	No	4.7	-0.528139	Formylglycinamidine-ribonucleotide (FGAM)-synthetase; catalyzes a step in the 'de novo' purine nucleotide biosynthetic pathway
YPR072W	NOT5	Antisens	0.914202	No	No	NA	0.375189	Subunit of CCR4-NOT global transcriptional regulator; involved intranscription initiation and elongation and in mRNA degradation; conserved lysine in human homolog of Not5p and Not3p is mutated in cancers
YDR227W	SIR4	PCG	0.914184	No	No	0.3	0.872451	SIR protein involved in assembly of silent chromatin domains; silent information regulator (SIR) along with SIR2 and SIR3; involved in assembly of silent chromatin domains at telomeres and the silent mating-type loci; potentially phosphorylated by Cdc28p; some alleles of SIR4 prolong lifespan
YHR127W	YHR127W	PCG	0.914146	No	No	0.8	0.390606	Protein of unknown function; localizes to the nucleus; required for asymmetric localization of Kar9p during mitosis
YDR033W	MRH1	Antisens	0.91413	No	No	NA	0.186165	Protein that localizes primarily to the plasma membrane; also found at the nuclear envelope; the authentic, non-tagged protein is detected in mitochondria in a phosphorylated state; MRH1 has a paralog, YRO2, that arose from the whole genome duplication
YLL010C	PSR1	Antisens	0.91412	No	No	NA	0.593063	Plasma membrane associated protein phosphatase; involved in the general stress response; required along with binding partner Whi2p for full activation of STRE-mediated gene expression, possibly through dephosphorylation of Msn2p; PSR1 has a paralog, PSR2, that arose from the whole genome duplication
YIL037C	PRM2	Antisens	0.914111	No	No	NA	0.703322	Pheromone-regulated protein; predicted to have 4 transmembrane segments and a coiled coil domain; regulated by Ste12p; required for efficient nuclear fusion
YDR300C	PRO1	PCG	0.914109	No	No	1.45	0.0422296	Gamma-glutamyl kinase; catalyzes the first step in proline biosynthesis; PRO1 has a paralog, YHR033W, that arose from the whole genome duplication
YKL182W	FAS1	Antisens	0.914104	No	No	NA	-0.586712	Beta subunit of fatty acid synthetase; complex catalyzes the synthesis of long-chain saturated fatty acids; contains acetyltransacylase, dehydratase, enoyl reductase, malonyl transacylase, and palmitoyl transacylase activities
YHR032W	ERC1	Antisens	0.914075	No	No	NA	0.51042	Member of the multi-drug and toxin extrusion (MATE) family; the MATE family is part of the multidrug/oligosaccharidyl-lipid/polysaccharide (MOP) exporter superfamily; overproduction confers ethionine resistance and accumulation of S-adenosylmethionine
chrXIII_223968_224266	chrXIII_223968_224266	Intergenic	0.914041	No	No	NA	NA	NA
YOR378W	YOR378W	PCG	0.914007	No	No	1.49	0.74131	Putative paralog of ATR1; but not required for boron tolerance; member of the DHA2 family of drug:H+ antiporters; YOR378W is not an essential gene
YIL068C	SEC6	Antisens	0.914002	No	No	NA	0.630518	Essential 88kDa subunit of the exocyst complex; the exocyst mediates polarized targeting and tethering of post-Golgi secretory vesicles to active sites of exocytosis at the plasma membrane prior to SNARE-mediated fusion; anchors the assembled complex to sites of secretion; interacts with SM-like protein and SNARE regulator Sec1p and may recruit it to sites of secretion; interacts with Sec9p and i…
YDR349C	YPS7	Antisens	0.913983	No	No	NA	0.654895	Putative GPI-anchored aspartic protease; member of the yapsin family of proteases involved in cell wall growth and maintenance; located in the cytoplasm and endoplasmic reticulum
YPL024W	RMI1	PCG	0.913927	No	No	1.49	1.16772	Subunit of the RecQ (Sgs1p) - Topo III (Top3p) complex; stimulates superhelical relaxing, DNA catenation/decatenation and ssDNA binding activities of Top3p; involved in response to DNA damage; functions in S phase-mediated cohesion establishment via a pathway involving the Ctf18-RFC complex and Mrc1p; stimulates Top3p DNA catenation/decatenation activity; null mutants display increased rates of r…
YOR353C	SOG2	PCG	0.913917	No	No	0.4	0.755119	Key component of the RAM signaling network; required for proper cell morphogenesis and cell separation after mitosis
YLL008W	DRS1	PCG	0.913883	No	No	3.24	0.0600361	Nucleolar DEAD-box protein required for ribosome assembly and function; including synthesis of 60S ribosomal subunits; constituent of 66S pre-ribosomal particles
YNL007C	SIS1	PCG	0.913876	No	No	9.43	0.523993	Type II HSP40 co-chaperone that interacts with the HSP70 protein Ssa1p; shuttles between the cytosol and nucleus to mediate delivery of misfolded proteins into the nucleus for degradation; not functionally redundant with Ydj1p due to substrate specificity; protein abundance increases in response to DNA replication stress; polyQ aggregates sequester Sis1p and interfere with clearance of misfolded …
YIR031C	DAL7	PCG	0.913818	No	No	0.2	0.947964	Malate synthase; can accept butyryl-CoA as acyl-CoA donor in addition to traditional substrate acetyl-CoA; recycles glyoxylate generated during allantoin degradation; expression sensitive to nitrogen catabolite repression and induced by allophanate, an intermediate in allantoin degradation
YOR245C	DGA1	Antisens	0.913781	No	No	NA	1.02841	Diacylglycerol acyltransferase; catalyzes the terminal step of triacylglycerol (TAG) formation, acylates diacylglycerol using acyl-CoA as an acyl donor; Lro1p and Dga1p can O-acylate ceramides; localized to lipid particles
YCL008C	STP22	PCG	0.913775	No	No	0.3	0.551992	Component of the ESCRT-I complex; ESCRT-I is involved in ubiquitin-dependent sorting of proteins into the endosome; homologous to the mouse and human Tsg101 tumor susceptibility gene; mutants exhibit a Class E Vps phenotype
YOR351C	MEK1	Antisens	0.913765	No	No	NA	0.664032	Meiosis-specific serine/threonine protein kinase; functions in meiotic checkpoint, promotes recombination between homologous chromosomes by suppressing double strand break repair between sister chromatids; stabilizes Hop1-Thr318 phosphorylation to promote interhomolog recombination and checkpoint responses during meiosis
YDR017C	KCS1	PCG	0.913754	No	Yes	1.27	0.420916	Inositol hexakisphosphate and inositol heptakisphosphate kinase; generation of high energy inositol pyrophosphates by Kcs1p is required for many processes such as vacuolar biogenesis, stress response, and telomere maintenance; inositol hexakisphosphate is also known as IP6; inositol heptakisphosphate is also known as IP7
YKL215C	OXP1	PCG	0.913741	No	No	0.6	0.485949	5-oxoprolinase; enzyme is ATP-dependent and functions as a dimer; similar to mouse Oplah gene; green fluorescent protein (GFP)-fusion protein localizes to the cytoplasm; protein abundance increases in response to DNA replication stress
chrVIII_293520_294532	chrVIII_293520_294532	Intergenic	0.913709	No	No	NA	NA	NA
YLR125W	YLR125W	Antisens	0.913708	No	No	NA	0.806687	Putative protein of unknown function; mutant has decreased Ty3 transposition; YLR125W is not an essential gene
YLR034C	SMF3	PCG	0.913684	No	No	3.52	0.706291	Putative divalent metal ion transporter involved in iron homeostasis; transcriptionally regulated by metal ions; member of the Nramp family of metal transport proteins; protein abundance increases in response to DNA replication stress
YNL032W	SIW14	PCG	0.913667	No	No	2.1	0.680827	Tyrosine phosphatase involved in actin organization and endocytosis; localized to the cytoplasm
YPR022C	YPR022C	Antisens	0.913638	No	No	NA	0.59759	Putative transcription factor, as suggested by computational analysis; green fluorescent protein (GFP)-fusion protein localizes to both the cytoplasm and the nucleus and is induced in response to the DNA-damaging agent MMS
YKL043W	PHD1	PCG	0.913621	No	No	0.8	0.641719	Transcriptional activator that enhances pseudohyphal growth; physically interacts with the Tup1-Cyc8 complex and recruits Tup1p to its targets; regulates expression of FLO11, an adhesin required for pseudohyphal filament formation; similar to StuA, an A. nidulans developmental regulator; potential Cdc28p substrate; PHD1 has a paralog, SOK2, that arose from the whole genome duplication
YKL044W	YKL044W	PCG	0.913621	No	No	0.3	1.03733	Protein of unknown function; mRNA identified as translated by ribosome profiling data
YIL005W	EPS1	PCG	0.913617	No	No	0.4	0.765664	ER protein with chaperone and co-chaperone activity; involved in retention of resident ER proteins; has a role in recognizing proteins targeted for ER-associated degradation (ERAD), member of the protein disulfide isomerase family
YJR016C	ILV3	PCG	0.913607	No	No	2.45	-0.195873	Dihydroxyacid dehydratase; catalyzes third step in the common pathway leading to biosynthesis of branched-chain amino acids
YOR113W	AZF1	Antisens	0.913567	No	No	NA	0.901178	Zinc-finger transcription factor; involved in diauxic shift; in the presence of glucose, activates transcription of genes involved in growth and carbon metabolism; in nonfermentable carbon sources, activates transcription of genes involved in maintenance of cell wall integrity; relocalizes to the cytosol in response to hypoxia
YDL202W	MRPL11	PCG	0.913519	No	No	0.9	0.476544	Mitochondrial ribosomal protein of the large subunit; localizes to vacuole in response to H2O2
YPR053C	YPR053C	PCG	0.913512	No	No	NA	0.342616	Dubious open reading frame; unlikely to encode a functional protein, based on available experimental and comparative sequence data; partially overlaps verified gene NHP6A/YPR052C
YLR383W	SMC6	PCG	0.9135	No	No	0.4	0.699818	Component of the SMC5-SMC6 complex; this complex plays a key role in the removal of X-shaped DNA structures that arise between sister chromatids during DNA replication and repair; homologous to S. pombe rad18
YDR514C	YDR514C	PCG	0.913495	No	Yes	1	0.648492	Protein of unknown function that localizes to mitochondria; overexpression affects endocytic protein trafficking; YDR514C has a paralog, GFD2, that arose from the whole genome duplication
YLL063C	AYT1	PCG	0.913481	No	No	0.1	0.701619	Acetyltransferase; catalyzes trichothecene 3-O-acetylation, suggesting a possible role in trichothecene biosynthesis
YNL080C	EOS1	Antisens	0.913418	No	No	NA	0.63261	Protein involved in N-glycosylation; deletion mutation confers sensitivity to exidative stress and shows synthetic lethality with mutations in the spindle checkpoint genes BUB3 and MAD1; YNL080C is not an essential gene
YLR011W	LOT6	PCG	0.913414	No	No	0.2	0.760329	FMN-dependent NAD(P)H:quinone reductase; role in apoptosis-like cell death; may be involved in quinone detoxification; expression elevated at low temperature; sequesters the Cin5p transcription factor in the cytoplasm in complex with the proteasome under reducing conditions
YML058W	SML1	PCG	0.913361	No	Yes	9.29	0.498931	Ribonucleotide reductase inhibitor; involved in regulating dNTP production; regulated by Mec1p and Rad53p during DNA damage and S phase; SML1 has a paralog, DIF1, that arose from the whole genome duplication
YHR067W	HTD2	PCG	0.913279	No	No	0.2	0.646931	Mitochondrial 3-hydroxyacyl-thioester dehydratase; involved in fatty acid biosynthesis, required for respiratory growth and for normal mitochondrial morphology
YLR450W	HMG2	PCG	0.913272	No	No	0.4	0.329683	HMG-CoA reductase; converts HMG-CoA to mevalonate, a rate-limiting step in sterol biosynthesis; one of two isozymes; overproduction induces assembly of peripheral ER membrane arrays and short nuclear-associated membrane stacks; forms foci at the nuclear periphery upon DNA replication stress; HMG2 has a paralog, HMG1, that arose from the whole genome duplication
YER022W	SRB4	Antisens	0.913241	No	No	NA	0.612485	Subunit of the RNA polymerase II mediator complex; associates with core polymerase subunits to form the RNA polymerase II holoenzyme; essential for transcriptional regulation; homozygosity of the human MED17 L371P mutation is associated with infantile cerebral and cerebellar atrophy with poor myelination
YDL168W	SFA1	PCG	0.913232	No	No	2.69	0.63567	Bifunctional alcohol dehydrogenase and formaldehyde dehydrogenase; formaldehyde dehydrogenase activity is glutathione-dependent; functions in formaldehyde detoxification and formation of long chain and complex alcohols, regulated by Hog1p-Sko1p; protein abundance increases in response to DNA replication stress
YPL150W	YPL150W	Antisens	0.913211	No	No	NA	0.793245	Protein kinase of unknown cellular role; binds phosphatidylinositols and cardiolipin in a large-scale study
YGR218W	CRM1	PCG	0.913193	No	No	1.17	0.280142	Major karyopherin; involved in export of proteins, RNAs, and ribosomal subunits from the nucleus; exportin
YBL040C	ERD2	Antisens	0.913186	No	No	NA	NA	HDEL receptor; an integral membrane protein that binds to the HDEL motif in proteins destined for retention in the endoplasmic reticulum; has a role in maintenance of normal levels of ER-resident proteins
YML048W	GSF2	PCG	0.913106	No	No	1.6	0.241619	Endoplasmic reticulum (ER) localized integral membrane protein; may promote secretion of certain hexose transporters, including Gal2p; involved in glucose-dependent repression
YGR240C	PFK1	PCG	0.913097	No	No	9.6	-0.430763	Alpha subunit of heterooctameric phosphofructokinase; involved in glycolysis, indispensable for anaerobic growth, activated by fructose-2,6-bisphosphate and AMP, mutation inhibits glucose induction of cell cycle-related genes
YMR181C	YMR181C	Antisens	0.913086	No	No	NA	1.03743	Protein of unknown function; mRNA transcribed as part of a bicistronic transcript with a predicted transcriptional repressor RGM1/YMR182C; mRNA is destroyed by nonsense-mediated decay (NMD); not an essential gene; YMR181C has a paralog, YPL229W, that arose from the whole genome duplication
YJL145W	SFH5	PCG	0.913061	No	Yes	1.7	0.356729	Non-classical phosphatidylinositol transfer protein (PITP); exhibits PI- but not PC-transfer activity; localizes to the peripheral endoplasmic reticulum, cytosol and microsomes; similar to Sec14p; partially relocalizes to the plasma membrane upon DNA replication stress
YOR361C	PRT1	PCG	0.913053	No	No	5.87	0.124729	eIF3b subunit of the eukaryotic translation initiation factor 3 (eIF3); subunit of the core complex of eIF3; essential for translation; part of a subcomplex (Prt1p-Rpg1p-Nip1p) that stimulates binding of mRNA and tRNA(i)Met to ribosomes
YDR028C	REG1	Antisens	0.912985	No	No	NA	0.491423	Regulatory subunit of type 1 protein phosphatase Glc7p; involved in negative regulation of glucose-repressible genes; involved in regulation of the nucleocytoplasmic shuttling of Hxk2p; REG1 has a paralog, REG2, that arose from the whole genome duplication
YGR044C	RME1	Antisens	0.912961	No	No	NA	0.398406	Zinc finger protein involved in control of meiosis; prevents meiosis by repressing IME1 expression and promotes mitosis by activating CLN2 expression; directly repressed by a1-alpha2 regulator; mediates cell type control of sporulation; relocalizes from nucleus to cytoplasm upon DNA replication stress
YGL022W	STT3	PCG	0.912957	No	No	2.09	-0.129386	Subunit of the oligosaccharyltransferase complex of the ER lumen; complex catalyzes asparagine-linked glycosylation of newly synthesized proteins; forms a subcomplex with Ost3p and Ost4p and is directly involved in catalysis
YDR479C	PEX29	PCG	0.912952	No	No	0.8	0.688445	Peroxisomal integral membrane peroxin; involved in the regulation of peroxisomal size, number and distribution; genetic interactions suggest that Pex28p and Pex29p act at steps upstream of those mediated by Pex30p, Pex31p, and Pex32p; forms ER foci upon DNA replication stress
chrIV_80553_83409	chrIV_80553_83409	Intergenic	0.912943	No	No	NA	NA	NA
YPL277C	YPL277C	PCG	0.912939	No	Yes	0.1	1.06878	Putative protein of unknown function; localized to the membranes; gene expression regulated by copper levels
YJR053W	BFA1	Antisens	0.912926	No	No	NA	0.837523	Component of the GTPase-activating Bfa1p-Bub2p complex; involved in multiple cell cycle checkpoint pathways that control exit from mitosis
YGR292W	MAL12	Antisens	0.912924	No	No	NA	0.625264	Maltase (alpha-D-glucosidase); inducible protein involved in maltose catabolism; encoded in the MAL1 complex locus; hydrolyzes the disaccharides maltose, turanose, maltotriose, and sucrose
YKL068W	NUP100	Antisens	0.912816	No	No	NA	0.423534	FG-nucleoporin component of central core of the nuclear pore complex; contributes directly to nucleocytoplasmic transport and maintenance of the nuclear pore complex (NPC) permeability barrier and is involved in gene tethering at the nuclear periphery; NUP100 has a paralog, NUP116, that arose from the whole genome duplication
YDR420W	HKR1	Antisens	0.912785	No	No	NA	0.773908	Mucin family member that functions as an osmosensor in the HOG pathway; functions in the Sho1p-mediated HOG pathway with Msb2p; proposed to be a negative regulator of filamentous growth; mutant displays defects in beta-1,3 glucan synthesis and bud site selection
YOR250C	CLP1	PCG	0.912776	No	No	0.4	0.832461	Component of the cleavage and polyadenylation factor I (CF I); CF 1, composed of the CF 1A complex (Rna14p, Rna15p, Clp1p, Pcf11p) and Hrp1, is involved in cleavage and polyadenylation of mRNA 3' ends; involved in both the endonucleolyitc cleavage and polyadenylation steps of mRNA 3'-end maturation
YER172C	BRR2	Antisens	0.912775	No	No	NA	0.544909	RNA-dependent ATPase RNA helicase (DEIH box); required for disruption of U4/U6 base-pairing in native snRNPs to activate the spliceosome for catalysis; homologous to human U5-200kD
YJR059W	PTK2	Antisens	0.912758	No	No	NA	0.765015	Putative serine/threonine protein kinase; involved in regulation of ion transport across plasma membrane; enhances spermine uptake; PTK2 has a paralog, PTK1, that arose from the whole genome duplication
YER122C	GLO3	Antisens	0.912745	No	No	NA	0.322933	ADP-ribosylation factor GTPase activating protein (ARF GAP); involved in ER-Golgi transport; shares functional similarity with Gcs1p
YBR239C	ERT1	PCG	0.912743	No	No	0.2	0.678121	Transcriptional regulator of nonfermentable carbon utilization; GFP-fusion protein localizes to cytoplasm, nucleus; null mutation affects periodicity of transcriptional and metabolic oscillation; plays role in restricting Ty1 transposition
YML034W	SRC1	Antisens	0.912723	No	No	NA	0.776214	Inner nuclear membrane protein; highly enriched at telomeres and subtelomeric regions; functions in regulation of subtelomeric genes and is linked to TREX (transcription export) factors; SRC1 produces 2 splice variant proteins with different functions; alternative splicing of SRC1 pre-mRNA is promoted by Hub1p; mutant has aneuploidy tolerance; SEC1 has a paralog, HEH2, that arose from the whole g…
YDR133C	YDR133C	Antisens	0.912695	No	No	NA	-0.0253006	Dubious open reading frame; unlikely to encode a functional protein, based on available experimental and comparative sequence data; partially overlaps YDR134C
YDR134C	YDR134C	Antisens	0.912695	No	No	NA	-0.0629605	Hypothetical protein; YDR134C has a paralog, CCW12, that arose from the whole genome duplication
YBL059W	YBL059W	Antisens	0.912691	No	No	NA	0.86117	Putative protein of unknown function; the authentic, non-tagged protein is detected in highly purified mitochondria in high-throughput studies; YBL059W has a paralog, YER093C-A, that arose from the whole genome duplication
chrXV_457962_459342	chrXV_457962_459342	Intergenic	0.912635	No	No	NA	NA	NA
chrX_471804_472315	chrX_471804_472315	Intergenic	0.912571	No	No	NA	NA	NA
YCR107W	AAD3	Antisens	0.91257	No	No	NA	0.498909	Putative aryl-alcohol dehydrogenase; similar to P. chrysosporium aryl-alcohol dehydrogenase; mutational analysis has not yet revealed a physiological role; AAD3 has a paralog, AAD15, that arose from a segmental duplication
YML075C	HMG1	PCG	0.91256	No	No	1.5	0.561805	HMG-CoA reductase; catalyzes the conversion of HMG-CoA to mevalonate, which is a rate-limiting step in sterol biosynthesis; one of two isozymes; localizes to the nuclear envelope; overproduction induces the formation of karmellae; forms foci at the nuclear periphery upon DNA replication stress; HMG1 has a paralog, HMG2, that arose from the whole genome duplication
chrIV_636664_636996	chrIV_636664_636996	Intergenic	0.912555	No	No	NA	NA	NA
YOL062C	APM4	PCG	0.912546	No	No	0.8	0.537296	Mu2-like subunit of the clathrin associated protein complex (AP-2); involved in vesicle transport
YML032C	RAD52	Antisens	0.912525	No	No	NA	0.784698	Protein that stimulates strand exchange; stimulates strand exchange by facilitating Rad51p binding to single-stranded DNA; anneals complementary single-stranded DNA; involved in the repair of double-strand breaks in DNA during vegetative growth and meiosis and UV induced sister chromatid recombination
YLR066W	SPC3	PCG	0.912404	No	No	1.6	0.471288	Subunit of signal peptidase complex; complex catalyzes cleavage of N-terminal signal sequences of proteins targeted to the secretory pathway; homologous to mammalian SPC22/23; other members of the complex are Spc1p, Spc2p, and Sec11p
YDR103W	STE5	PCG	0.912392	No	No	0.3	0.76761	Pheromone-responsive MAPK scaffold protein; couples activation of the G-protein-coupled pheromone receptor to MAPK activation; intramolecular interaction of PH and VWA domains blocks activation of assembled signaling cascade components (Ste11p, Ste7p and Fus3p) under basal conditions; Gbeta-gamma (Ste4p-Ste18p)-dependent docking at the plasma membrane and binding of PI(4,5)P2 by the PH domain rel…
YMR125W	STO1	PCG	0.912387	No	No	1.26	0.0536644	Large subunit of the nuclear mRNA cap-binding protein complex; interacts with Npl3p to carry nuclear poly(A)+ mRNA to cytoplasm; also involved in nuclear mRNA degradation and telomere maintenance; orthologous to mammalian CBP80
snR55	SNR55	ncRNA	0.912354	Yes	Yes	NA	1.47555	C/D box small nucleolar RNA (snoRNA); predicted to guide 2'-O-methylation of small subunit (SSU) rRNA at position U1269
YPL221W	FLC1	PCG	0.912349	No	No	1.1	1.07735	Putative FAD transporter; required for uptake of FAD into endoplasmic reticulum; involved in cell wall maintenance; FLC1 has a paralog, FLC3, that arose from the whole genome duplication
YCR050C	YCR050C	PCG	0.912313	No	No	1.35	0.134659	Non-essential protein of unknown function; deletion mutant is synthetically sick or lethal with alpha-synuclein
YFLWtau1	YFLWtau1	long_terminal_repeat	0.912299	No	No	NA	NA	Ty4 LTR
YOL139C	CDC33	Antisens	0.912289	No	No	NA	-0.204218	mRNA cap binding protein and translation initiation factor eIF4E; the eIF4E-cap complex is responsible for mediating cap-dependent mRNA translation via interactions with translation initiation factor eIF4G (Tif4631p or Tif4632p); protein abundance increases in response to DNA replication stress; mutants are defective for adhesion and pseudohyphal growth
[truncated: 3,273 more rows]
