# Supplementary material for: Transcriptome Wide Annotation of Eukaryotic RNase III Reactivity and Degradation Signals
Source: PLoS Genet. 2015 Feb 13;11(2):e1005000. doi: 10.1371/journal.pgen.1005000 (PMC4334505; doi:10.1371/journal.pgen.1005000)
Supplement: S16 Table — (XLSX) [file pgen.1005000.s023.xlsx]

## Sheet: S16. Top 30 SALI Clusters
Table S16 (related to Figure 4): Top 30 Enriched Read Clusters Predicted by SALI
Chromosome Number	Start	End	Read Count	Strand	Feature ID Associated with Enriched Reads	Feature Name Associated with Enriched Reads	Feature Type Associated with Enriched Reads	Location of the Enriched Reads	Loop type	Loop Sequence	NGNN loop score	Known Substrate	SGD Predicted Expression Level (RNA/cell)	Change in Expression Upon RNT1 deletion (log2)	Gene Function
chrXIII	67953	67992	55247	-	snR85	snR85	ncRNA	5'	NGNN	AGGC	0.889893	No	NA	0.423509	H/ACA box small nucleolar RNA (snoRNA); predicted to guide pseudouridylation of small subunit (SSU) rRNA at position U1181
chrX	349301	349343	22883	-	snR60	snR60	ncRNA	5'	NGNN	AGGU	0.988583	Yes	NA	1.12515	C/D box small nucleolar RNA (snoRNA); guides 2'-O-methylation of large subunit (LSU) rRNA at positions A817 and G908
chrIII	107752	107792	14763	-	snR43	snR43	ncRNA	5'	NGNN	AGUG	0.984554	Yes	NA	-0.288251	H/ACA box small nucleolar RNA (snoRNA); guides pseudouridylation of large subunit (LSU) rRNA at position U966 and of 5.8S rRNA at position 73
chrXII	348564	348602	11331	-	snR79	snR79	ncRNA	5'	NGNN	AGGA	0.941031	Yes	NA	2.22796	C/D box small nucleolar RNA (snoRNA); guides 2'-O-methylation of small subunit (SSU) rRNA at position C1007
chrXI	364643	364680	7070	+	snR69	snR69	ncRNA	3'	NGNN	AGGA	0.937999	Yes	NA	-0.0538276	C/D box small nucleolar RNA (snoRNA); guides 2'-O-methylation of large subunit (LSU) rRNA at position C2948
chrXII	663295	663332	5438	-	YLR259C	HSP60	PCG	ORF	NGNN	AGGU	0.986474	No	8.74	-0.848364	Tetradecameric mitochondrial chaperonin; required for ATP-dependent folding of precursor polypeptides and complex assembly; prevents aggregation and mediates protein refolding after heat shock; role in mtDNA transmission; phosphorylated
chrXV	409886	409922	4597	-	snR62	snR62	ncRNA	5'	NGNN	AGUG	0.973288	No	NA	NA	C/D box small nucleolar RNA (snoRNA); guides 2'-O-methylation of large subunit (LSU) rRNA at position U1888
chrXV	136222	136261	2170	-	snR58	snR58	ncRNA	5'	NGNN	AGAU	0.986231	Yes	NA	0.658311	C/D box small nucleolar RNA (snoRNA); guides 2'-O-methylation of large subunit (LSU) rRNA at position C663
chrX	139991	140030	1955	-	snR190	snR190	ncRNA	5'	NGNN	AGUU	0.727702	Yes	NA	0.70719	C/D box small nucleolar RNA (snoRNA); predicted to guide 2'-O-methylation of large subunit (LSU) rRNA at position G2395; not shown to be active
chrIX	96978	97015	1875	+	snR68	snR68	ncRNA	5'	NGNN	AGGA	0.99374	Yes	NA	0.431405	C/D box small nucleolar RNA (snoRNA); guides 2'-O-methylation of large subunit (LSU) rRNA at position A2640
chrIII	177092	177128	1773	+	snR65	snR65	ncRNA	5'	NGNN	AGAA	0.984769	Yes	NA	0.0444991	C/D box small nucleolar RNA (snoRNA); guides 2'-O-methylation of large subunit (LSU) rRNA at position U2347
chrXVI	719287	719324	1628	-	snR41	snR41	ncRNA	5'	NGNN	AGUA	0.917718	No	NA	0.848385	C/D box small nucleolar RNA (snoRNA); guides 2'-O-methylation of small subunit (SSU) rRNA at positions A541 and G1126
chrVII	366530	366568	1258	-	snR39B	snR39B	ncRNA	5'	NGNN	AGUU	0.934268	Yes	NA	1.04341	C/D box small nucleolar RNA (snoRNA); guides 2'-O-methylation of large subunit (LSU) rRNA at position G805
chrXIII	298484	298521	1076	+	snR72	snR72	ncRNA	5'	NGNN	AGUU	0.977637	Yes	NA	1.0136	C/D box small nucleolar RNA (snoRNA); guides 2'-O-methylation of large subunit (LSU) rRNA at position A876
chrXIII	98234	98268	590	-	YML085C	TUB1	PCG	ORF	NGNN	GGUU	0.917918	No	2.6	0.160198	Alpha-tubulin; associates with beta-tubulin (Tub2p) to form tubulin dimer, which polymerizes to form microtubules; relative distribution to nuclear foci increases upon DNA replication stress; TUB1 has a paralog, TUB3, that arose from the whole genome duplication
chrV	431284	431320	484	-	snR52	snR52	ncRNA	5'	NGNN	AGAU	0.938636	Yes	NA	0.272189	C/D box small nucleolar RNA (snoRNA); guides 2'-O-methylation of large subunit (LSU) rRNA at position U2921 and small subunit (SSU) rRNA at position A420
chrVII	96095	96130	459	+	YGL209W	MIG2	PCG	ORF	NGNN	AGGA	0.988247	Yes	2.45	0.389561	Zinc finger transcriptional repressor; cooperates with Mig1p in glucose-induced repression of many genes; under low glucose conditions Mig2p relocalizes to mitochondrion, where it interacts with Ups1p and antagonizes mitochondrial fission factor, Dnm1p, indicative of a role in mitochondrial fusion or regulating morphology; regulates filamentous growth along with Mig2p in response to glucose deple…
chrIX	86255	86291	455	+	YIL140W	AXL2	PCG	ORF	NGNN	AGAU	0.978495	No	0.4	0.864221	Integral plasma membrane protein; required for axial budding in haploid cells; localizes to the incipient bud site and bud neck; glycosylated by Pmt4p; potential Cdc28p substrate
chrII	680626	680662	416	-	LSR1	U2	ncRNA	3'	NGNN	AGUU	0.998347	Yes	NA	-0.212697	U2 spliceosomal RNA (U2 snRNA), component of the spliceosome; pairs with the branchpoint sequence; functionally equivalent to mammalian U2 snRNA; stress-induced pseudouridylations at positions 56 and 93 may contribute to regulation of splicing
chrXIV	89104	89142	245	+	snR40	snR40	ncRNA	5'	NGNN	AGUU	0.978266	Yes	NA	0.0184513	C/D box small nucleolar RNA (snoRNA); guides 2'-O-methylation of large subunit (LSU) rRNA at position U898 and small subunit (SSU) rRNA at position G1271
chrXIV	229986	230022	234	-	snR19	U1	ncRNA	3'	NGNN	UGGU	0.947187	Yes	NA	0.167156	U1 spliceosomal RNA (U1 snRNA); snRNA U1 homolog
chrVIII	411137	411172	221	+	snR71	snR71	ncRNA	5'	NGNN	GGUU	0.95899	Yes	NA	0.50784	C/D box small nucleolar RNA (snoRNA); guides 2'-O-methylation of large subunit (LSU) rRNA at position A2946
chrII	47296	47330	214	-	YBL091C	MAP2	PCG	3'	NGNN	UGUU	0.884356	No	3.55	0.127302	Methionine aminopeptidase; catalyzes the cotranslational removal of N-terminal methionine from nascent polypeptides; function is partially redundant with that of Map1p
chrVI	254043	254078	206	-	YFR053C	HXK1	PCG	ORF	NGNN	AGGA	0.926787	No	3.7	0.511995	Hexokinase isoenzyme 1; a cytosolic protein that catalyzes phosphorylation of glucose during glucose metabolism; expression is highest during growth on non-glucose carbon sources; glucose-induced repression involves hexokinase Hxk2p; HXK1 has a paralog, HXK2, that arose from the whole genome duplication
chrXVI	416601	416638	206	+	YPL074W	YTA6	PCG	ORF	NGNN	AGGC	0.875575	No	0.6	0.891518	Putative ATPase of the CDC48/PAS1/SEC18 (AAA) family; localized to the cortex of mother cells but not to daughter cells; relocalizes from cytoplasm to plasma membrane foci upon DNA replication stress
chrIV	323532	323568	199	-	snR63	snR63	ncRNA	5'	NGNN	AGUU	0.986929	Yes	NA	0.324251	C/D box small nucleolar RNA (snoRNA); guides 2'-O-methylation of large subunit (LSU) rRNA at position A2256
chrXII	795105	795143	166	-	snR57	snR57	ncRNA	5'	NGNN	AGGA	0.949212	Yes	NA	2.6215	C/D box small nucleolar RNA (snoRNA); guides 2'-O-methylation of small subunit (SSU) rRNA at position G1572
chrXIV	198998	199032	154	-	YNL240C	NAR1	PCG	ORF	NGNN	AGAU	0.894866	No	1.38	-0.0305948	Subunit of the cytosolic iron-sulfur (FeS) protein assembly machinery; required for maturation of cytosolic and nuclear FeS proteins and for normal resistance to oxidative stress; homologous to human Narf
chrXIII	626287	626321	151	+	snR83	snR83	ncRNA	5'	NGNN	AGUU	0.834384	No	NA	-0.196724	H/ACA box small nucleolar RNA (snoRNA); guides pseudouridylation of small subunit (SSU) rRNA at positions U1290 and U1415
chrXIII	298051	298093	147	+	snR74	snR74	ncRNA	5'	NGNN	AGUU	0.897719	Yes	NA	3.45045	C/D box small nucleolar RNA (snoRNA); guides 2'-O-methylation of small subunit (SSU) rRNA at position A28
NA indicates non-available data
Blank boxes indicate not applicable
The start and end indicate the genomic position where the enriched read cluster starts and ends
PCG indicates protein coding gene
ncRNA indicates non-coding RNA
Intergenic means clusters found between two genes without known overlapping features
